# Supplementary material for: Optimization of Microchannels and Application of Basic Activation Functions of Deep Neural Network for Accuracy Analysis of Microfluidic Parameter Data
Source: MDPI journal article supplement (doi:10.3390/mi13081352), 2022-08-20

```

import os
import numpy as np
import pandas as pd

import tensorflow as tf
from tensorflow.python.keras.layers import Input, Dense           # for model generation
from tensorflow.python.keras.models import Model                  # for model generation
from sklearn.model_selection import train_test_split              # for test data and train data separation
from sklearn.model_selection import KFold, StratifiedKFold        # For cross validation check
from tensorflow.random import set_seed                             # for setting seed
#set_seed(1234)
import matplotlib.pyplot as plt
from sklearn.model_selection import KFold                          # For k-fold cross validation

import time

def current_milli_time():
    return round(time.time() * 1000)

```

## ➤ Now our aim is to predict the possible inputs for desired output parameters.

Therefore, real\_time\_input will be the output for this ML system and real\_time\_output will be the input.

```

#data = pd.read_csv('ML_in_microfluidics_data.csv') # importing the data. Already in the drive folder. Just add into to files
data = pd.read_csv('400_new_formatted_data.csv') # importing the data. Already in the drive folder. Just add into to files

```

```

data.dtypes                                #Checking data types of the columns

```

```

C1                float64
Cout              float64
v (Inlets)        float64
Pressure at Inlet1 float64
pressure at Inlet2 float64

```

```
v(outlet)          float64
pressure drop      float64
dtype: object
```

```
data.head()
```

|   | C1           | Cout         | v (Inlets) | Pressure at Inlet1 | pressure at Inlet2 | v(outlet) | pressure drop |
|---|--------------|--------------|------------|--------------------|--------------------|-----------|---------------|
| 0 | 1.667000e-08 | 3.167300e-08 | 0.000003   | 2.318000e-13       | 2.737000e-13       | 0.000005  | 2.619000e-13  |
| 1 | 3.334000e-08 | 6.334600e-08 | 0.000006   | 4.637000e-13       | 5.474000e-13       | 0.000009  | 5.238000e-13  |
| 2 | 5.001000e-08 | 9.501900e-08 | 0.000009   | 6.956000e-13       | 8.211000e-13       | 0.000014  | 7.858000e-13  |
| 3 | 6.668000e-08 | 1.300260e-07 | 0.000012   | 9.275000e-13       | 1.094800e-12       | 0.000019  | 1.075300e-12  |
| 4 | 8.335000e-08 | 1.633660e-07 | 0.000016   | 1.159300e-12       | 1.368600e-12       | 0.000024  | 1.351000e-12  |

```
real_time_output = data[['v (Inlets)' , 'Pressure at Inlet1' , 'pressure at Inlet2' , 'v(outlet)', 'pressure drop']].copy()
#real_time_output.head()
real_time_input = data[['C1' , 'Cout' ]].copy()
#real_time_input.head()
```

```
seed_value = 100
threshold_value = 6*10**-5      #threshold value to compute the prediction and actual value
```

```
#my_activation_func = 'LeakyReLU'
my_activation_func = 'ReLU'
my_optimizer = 'adam'
```

```
#Implementing cross validation
```

```
k = 5 #Number of folds
kf = KFold(n_splits=k, shuffle = True, random_state=1)
```

```
my_epoch = 20 # number of epochs in training
my_batch_size = 50 # number of batch in training

input1 = Input(shape=(5,))
l1 = Dense(10, activation = my_activation_func)(input1)
l2 = Dense(25, activation = my_activation_func)(l1)
l3 = Dense(50, activation = my_activation_func)(l2)
l4 = Dense(100, activation = my_activation_func)(l3)
l5 = Dense(100, activation = my_activation_func)(l4)
l6 = Dense(50, activation = my_activation_func)(l5)
l7 = Dense(25, activation = my_activation_func)(l6)
l8 = Dense(10, activation = my_activation_func)(l7)
out = Dense(2)(l8)

def custom_loss_function(y_true, y_pred):
    squared_difference = tf.abs(tf.square(y_true - y_pred))
    return tf.reduce_mean(squared_difference, axis=-1)

#model.compile(optimizer='adam', loss=custom_loss_function)

model = Model(inputs=input1, outputs=[out])

model.compile(optimizer = my_optimizer,
              loss=custom_loss_function)

acc_score = []
epoch_loss =[]
for train_index , test_index in kf.split(real_time_output):
    x_train , x_test = real_time_output.iloc[train_index,:],real_time_output.iloc[test_index,:]
    y_train , y_test = real_time_input.iloc[train_index,:] , real_time_input.iloc[test_index,:]

    test_x_dim = x_test.shape[0]
    print('Test sample size {}'.format(test_x_dim))
    history = model.fit(x_train, y_train, epochs = my_epoch, batch_size = my_batch_size)
```

```

pred = model.predict(x_test)

abs_diff = np.absolute(np.array(y_test) - np.array(pred)) #final accuracy is calculated based on absolute difference betw
comparison_result = abs_diff <= threshold_value
df = pd.DataFrame(comparison_result) #, dtype='float64')

count = 0
for i in range(test_x_dim):
#   if np.sum(df[0][i]) + np.sum(df[0][i]) == 2:
        if np.sum(df[0][i]) + np.sum(df[1][i]) == 2: # both the input parameters deviation must be within threshold value
            #print(df[0][i],df[0][i])
            count = count + 1
accuracy = (count/test_x_dim)*100
acc_score.append(accuracy)
epoch_loss.append(history.history['loss'])

avg_acc_score = sum(acc_score)/k
print('Activation functions: {}'.format(my_activation_func))
print('Optimizer: {}'.format(my_optimizer))
print('Epochs = {}, Batch size = {}'.format(my_epoch, my_batch_size))
print('Threshold value = {}'.format(threshold_value))
print('Number of folds = {}'.format(k))
print('Accuracy of each fold : {}'.format(acc_score))
print('Avg accuracy : {0:7.2f} %'.format(avg_acc_score))
epoch_loss_array = np.array(epoch_loss)
epoch_loss_array.shape
#print(epoch_loss_array)

text_file_name = my_activation_func + '_' + my_optimizer + '_epoch_' + str(my_epoch) + '_batch_' + str(my_batch_size)+'__'+ :
with open(text_file_name, "w") as variable_file:
    variable_file.write('Activation functions: {}\n'.format(my_activation_func))
    variable_file.write('Optimizer: {}\n'.format(my_optimizer))
    variable_file.write('Epochs = {}, Batch size = {}\n'.format(my_epoch, my_batch_size))
    variable_file.write('Threshold value = {}\n'.format(threshold_value))
    variable_file.write('Number of folds = {}\n'.format(k))
    variable_file.write('Accuracy of each fold : {}\n'.format(acc_score))
    variable_file.write('Avg accuracy : {0:7.2f} %\n'.format(avg_acc_score))

```

```
variable_file.write('Epoch loss : \n')  
variable_file.write(str(epoch_loss_array))
```

Test sample size 320

Epoch 1/20

26/26 [=====] - 1s 2ms/step - loss: 2.2394e-07

Epoch 2/20

26/26 [=====] - 0s 2ms/step - loss: 8.2417e-09

Epoch 3/20

26/26 [=====] - 0s 2ms/step - loss: 1.1342e-09

Epoch 4/20

26/26 [=====] - 0s 2ms/step - loss: 5.4757e-10

Epoch 5/20

26/26 [=====] - 0s 2ms/step - loss: 3.4211e-10

Epoch 6/20

26/26 [=====] - 0s 2ms/step - loss: 3.4015e-10

Epoch 7/20

26/26 [=====] - 0s 3ms/step - loss: 9.5877e-10

Epoch 8/20

26/26 [=====] - 0s 3ms/step - loss: 3.9606e-10

Epoch 9/20

26/26 [=====] - 0s 2ms/step - loss: 4.4072e-10

Epoch 10/20

26/26 [=====] - 0s 3ms/step - loss: 2.7964e-10

Epoch 11/20

26/26 [=====] - 0s 2ms/step - loss: 1.0374e-09

Epoch 12/20

26/26 [=====] - 0s 2ms/step - loss: 1.5685e-09

Epoch 13/20

26/26 [=====] - 0s 3ms/step - loss: 7.8917e-10

Epoch 14/20

26/26 [=====] - 0s 2ms/step - loss: 6.8454e-09

Epoch 15/20

26/26 [=====] - 0s 3ms/step - loss: 3.2274e-10

Epoch 16/20

26/26 [=====] - 0s 2ms/step - loss: 3.0709e-10

Epoch 17/20

26/26 [=====] - 0s 2ms/step - loss: 5.7347e-10

Epoch 18/20

26/26 [=====] - 0s 2ms/step - loss: 2.0712e-09

Epoch 19/20

```
26/26 [=====] - 0s 2ms/step - loss: 3.6267e-09
Epoch 20/20
26/26 [=====] - 0s 2ms/step - loss: 1.2191e-09
Test sample size 320
Epoch 1/20
26/26 [=====] - 0s 3ms/step - loss: 4.4411e-09
Epoch 2/20
26/26 [=====] - 0s 2ms/step - loss: 2.5467e-09
Epoch 3/20
26/26 [=====] - 0s 2ms/step - loss: 3.4242e-09
Epoch 4/20
26/26 [=====] - 0s 2ms/step - loss: 2.2612e-09
Epoch 5/20
26/26 [=====] - 0s 2ms/step - loss: 1.0601e-09
Epoch 6/20
26/26 [=====] - 0s 2ms/step - loss: 9.7217e-09
Epoch 7/20
26/26 [=====] - 0s 3ms/step - loss: 1.1915e-09
Epoch 8/20
26/26 [=====] - 0s 2ms/step - loss: 1.2770e-09
```

```
def custom_loss_function(y_true, y_pred):
    squared_difference = tf.abs(tf.square(y_true - y_pred))
    return tf.reduce_mean(squared_difference, axis=-1)
```

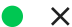

Supplement: s1 [file s1]
