# Supplementary material for: Optimization of Microchannels and Application of Basic Activation Functions of Deep Neural Network for Accuracy Analysis of Microfluidic Parameter Data
Source: MDPI journal article supplement (doi:10.3390/mi13081352), 2022-08-20
Supplement: s1 [file s1]

| C1            | Cout           | v (Inlets)        | Pressure at Inlet1 | pressure at Inlet2 | v(outlet)        | pressure drop |
|---------------|----------------|-------------------|--------------------|--------------------|------------------|---------------|
| 0.0000001667  | 0.00000031673  | 0.000003110074627 | 0                  | 0                  | 0.00000469925816 | 0             |
| 0.0000003334  | 0.00000063346  | 0.000006220149254 | 0                  | 0                  | 0.00000939851632 | 0             |
| 0.0000005001  | 0.00000095019  | 0.000009330223881 | 0                  | 0                  | 0.00001409777448 | 0             |
| 0.0000006668  | 0.000000130026 | 0.00001244029851  | 0                  | 0                  | 0.00001929169139 | 0             |
| 0.0000008335  | 0.000000163366 | 0.00001555037313  | 0                  | 0                  | 0.00002423827893 | 0             |
| 0.00000010002 | 0.0000001667   | 0.00001866044776  | 0                  | 0                  | 0.00002473293769 | 0             |
| 0.00000011669 | 0.00000021671  | 0.00002177052239  | 0                  | 0                  | 0.00003215281899 | 0             |
| 0.00000013336 | 0.00000025005  | 0.00002488059701  | 0                  | 0                  | 0.00003709940653 | 0             |
| 0.00000015003 | 0.00000026672  | 0.00002799067164  | 0                  | 0                  | 0.0000395727003  | 0             |
| 0.0000001667  | 0.00000031673  | 0.00003110074627  | 0                  | 0                  | 0.0000469925816  | 0             |
| 0.00000018337 | 0.00000035007  | 0.0000342108209   | 0                  | 0                  | 0.00005193916914 | 0             |
| 0.00000020004 | 0.00000036674  | 0.00003732089552  | 0                  | 0                  | 0.00005441246291 | 0             |
| 0.00000021671 | 0.00000040008  | 0.00004043097015  | 0                  | 0                  | 0.00005935905045 | 0             |
| 0.00000023338 | 0.00000045009  | 0.00004354104478  | 0                  | 0                  | 0.00006677893175 | 0             |
| 0.00000025005 | 0.00000046676  | 0.0000466511194   | 0                  | 0                  | 0.00006925222552 | 0             |
| 0.00000026672 | 0.00000051677  | 0.00004976119403  | 0                  | 0                  | 0.00007667210682 | 0             |
| 0.00000028339 | 0.00000055011  | 0.00005287126866  | 0                  | 0                  | 0.00008161869436 | 0             |
| 0.00000030006 | 0.00000058345  | 0.00005598134328  | 0                  | 0                  | 0.0000865652819  | 0             |
| 0.00000031673 | 0.00000061679  | 0.00005909141791  | 0                  | 0                  | 0.00009151186944 | 0             |
| 0.0000003334  | 0.00000063346  | 0.00006220149254  | 0                  | 0                  | 0.0000939851632  | 0             |
| 0.00000035007 | 0.0000006668   | 0.00006531156716  | 0                  | 0                  | 0.00009893175074 | 0             |
| 0.00000036674 | 0.00000070014  | 0.00006842164179  | 0                  | 0                  | 0.0001038783383  | 0             |
| 0.00000038341 | 0.00000075015  | 0.00007153171642  | 0                  | 0                  | 0.0001112982196  | 0             |
| 0.00000040008 | 0.00000076682  | 0.00007464179104  | 0                  | 0                  | 0.0001137715134  | 0             |
| 0.00000041675 | 0.00000081683  | 0.00007775186567  | 0                  | 0                  | 0.0001211913947  | 0             |
| 0.00000043342 | 0.00000085017  | 0.0000808619403   | 0                  | 0                  | 0.0001261379822  | 0             |
| 0.00000045009 | 0.00000086684  | 0.00008397201493  | 0                  | 0                  | 0.000128611276   | 0             |
| 0.00000046676 | 0.00000091685  | 0.00008708208955  | 0                  | 0                  | 0.0001360311573  | 0             |
| 0.00000048343 | 0.00000093352  | 0.00009019216418  | 0                  | 0                  | 0.000138504451   | 0             |
| 0.0000005001  | 0.00000095019  | 0.00009330223881  | 0                  | 0                  | 0.0001409777448  | 0             |
| 0.00000051677 | 0.0000010002   | 0.00009641231343  | 0                  | 0                  | 0.0001483976261  | 0             |
| 0.00000053344 | 0.00000105021  | 0.00009952238806  | 0                  | 0                  | 0.0001558175074  | 0             |
| 0.00000055011 | 0.00000106688  | 0.0001026324627   | 0                  | 0                  | 0.0001582908012  | 0             |
| 0.00000056678 | 0.00000110022  | 0.0001057425373   | 0                  | 0                  | 0.0001632373887  | 0             |
| 0.00000058345 | 0.00000111689  | 0.0001088526119   | 0                  | 0                  | 0.0001657106825  | 0             |
| 0.00000060012 | 0.0000011669   | 0.0001119626866   | 0                  | 0                  | 0.0001731305638  | 0             |
| 0.00000061679 | 0.00000118357  | 0.0001150727612   | 0                  | 0                  | 0.0001756038576  | 0             |
| 0.00000063346 | 0.00000125025  | 0.0001181828358   | 0                  | 0                  | 0.0001854970326  | 0             |
| 0.00000065013 | 0.00000128359  | 0.0001212929104   | 0                  | 0                  | 0.0001904436202  | 0             |
| 0.0000006668  | 0.00000130026  | 0.0001244029851   | 0                  | 0                  | 0.0001929169139  | 0             |

|               |               |                 |   |   |                 |   |
|---------------|---------------|-----------------|---|---|-----------------|---|
| 0.00000068347 | 0.0000013336  | 0.0001275130597 | 0 | 0 | 0.0001978635015 | 0 |
| 0.00000070014 | 0.00000138361 | 0.0001306231343 | 0 | 0 | 0.0002052833828 | 0 |
| 0.00000071681 | 0.00000140028 | 0.000133733209  | 0 | 0 | 0.0002077566766 | 0 |
| 0.00000073348 | 0.00000143362 | 0.0001368432836 | 0 | 0 | 0.0002127032641 | 0 |
| 0.00000075015 | 0.00000146696 | 0.0001399533582 | 0 | 0 | 0.0002176498516 | 0 |
| 0.00000076682 | 0.00000151697 | 0.0001430634328 | 0 | 0 | 0.0002250697329 | 0 |
| 0.00000078349 | 0.00000153364 | 0.0001461735075 | 0 | 0 | 0.0002275430267 | 0 |
| 0.00000080016 | 0.00000155031 | 0.0001492835821 | 0 | 0 | 0.0002300163205 | 0 |
| 0.00000081683 | 0.00000160032 | 0.0001523936567 | 0 | 0 | 0.0002374362018 | 0 |
| 0.0000008335  | 0.00000163366 | 0.0001555037313 | 0 | 0 | 0.0002423827893 | 0 |
| 0.00000085017 | 0.00000165033 | 0.000158613806  | 0 | 0 | 0.0002448560831 | 0 |
| 0.00000086684 | 0.00000168367 | 0.0001617238806 | 0 | 0 | 0.0002498026706 | 0 |
| 0.00000088351 | 0.00000173368 | 0.0001648339552 | 0 | 0 | 0.0002572225519 | 0 |
| 0.00000090018 | 0.00000176702 | 0.0001679440299 | 0 | 0 | 0.0002621691395 | 0 |
| 0.00000091685 | 0.000001667   | 0.0001710541045 | 0 | 0 | 0.0002473293769 | 0 |
| 0.00000093352 | 0.00000186704 | 0.0001741641791 | 0 | 0 | 0.0002770089021 | 0 |
| 0.00000095019 | 0.00000188371 | 0.0001772742537 | 0 | 0 | 0.0002794821958 | 0 |
| 0.00000096686 | 0.00000191705 | 0.0001803843284 | 0 | 0 | 0.0002844287834 | 0 |
| 0.00000098353 | 0.00000195039 | 0.000183494403  | 0 | 0 | 0.0002893753709 | 0 |
| 0.0000010002  | 0.00000198373 | 0.0001866044776 | 0 | 0 | 0.0002943219585 | 0 |
| 0.00000101687 | 0.0000020004  | 0.0001897145522 | 0 | 0 | 0.0002967952522 | 0 |
| 0.00000103354 | 0.00000203374 | 0.0001928246269 | 0 | 0 | 0.0003017418398 | 0 |
| 0.00000105021 | 0.00000205041 | 0.0001959347015 | 0 | 0 | 0.0003042151335 | 0 |
| 0.00000106688 | 0.00000208375 | 0.0001990447761 | 0 | 0 | 0.0003091617211 | 0 |
| 0.00000108355 | 0.00000213376 | 0.0002021548507 | 0 | 0 | 0.0003165816024 | 0 |
| 0.00000110022 | 0.0000021671  | 0.0002052649254 | 0 | 0 | 0.0003215281899 | 0 |
| 0.00000111689 | 0.00000220044 | 0.000208375     | 0 | 0 | 0.0003264747774 | 0 |
| 0.00000113356 | 0.00000225045 | 0.0002114850746 | 0 | 0 | 0.0003338946588 | 0 |
| 0.00000115023 | 0.00000226712 | 0.0002145951493 | 0 | 0 | 0.0003363679525 | 0 |
| 0.0000011669  | 0.00000230046 | 0.0002177052239 | 0 | 0 | 0.0003413145401 | 0 |
| 0.00000118357 | 0.0000023338  | 0.0002208152985 | 0 | 0 | 0.0003462611276 | 0 |
| 0.00000120024 | 0.00000236714 | 0.0002239253731 | 0 | 0 | 0.0003512077151 | 0 |
| 0.00000121691 | 0.00000241715 | 0.0002270354478 | 0 | 0 | 0.0003586275964 | 0 |
| 0.00000123358 | 0.00000243382 | 0.0002301455224 | 0 | 0 | 0.0003611008902 | 0 |
| 0.00000125025 | 0.00000248383 | 0.000233255597  | 0 | 0 | 0.0003685207715 | 0 |
| 0.00000126692 | 0.0000025005  | 0.0002363656716 | 0 | 0 | 0.0003709940653 | 0 |
| 0.00000128359 | 0.00000253384 | 0.0002394757463 | 0 | 0 | 0.0003759406528 | 0 |
| 0.00000130026 | 0.00000258385 | 0.0002425858209 | 0 | 0 | 0.0003833605341 | 0 |
| 0.00000131693 | 0.00000261719 | 0.0002456958955 | 0 | 0 | 0.0003883071217 | 0 |
| 0.0000013336  | 0.00000265053 | 0.0002488059701 | 0 | 0 | 0.0003932537092 | 0 |

|               |               |                 |   |   |                 |   |
|---------------|---------------|-----------------|---|---|-----------------|---|
| 0.00000135027 | 0.0000026672  | 0.0002519160448 | 0 | 0 | 0.000395727003  | 0 |
| 0.00000136694 | 0.00000270054 | 0.0002550261194 | 0 | 0 | 0.0004006735905 | 0 |
| 0.00000138361 | 0.00000273388 | 0.000258136194  | 0 | 0 | 0.000405620178  | 0 |
| 0.00000140028 | 0.00000278389 | 0.0002612462687 | 0 | 0 | 0.0004130400593 | 0 |
| 0.00000141695 | 0.00000281723 | 0.0002643563433 | 0 | 0 | 0.0004179866469 | 0 |
| 0.00000143362 | 0.0000028339  | 0.0002674664179 | 0 | 0 | 0.0004204599407 | 0 |
| 0.00000145029 | 0.00000286724 | 0.0002705764925 | 0 | 0 | 0.0004254065282 | 0 |
| 0.00000146696 | 0.00000291725 | 0.0002736865672 | 0 | 0 | 0.0004328264095 | 0 |
| 0.00000148363 | 0.00000295059 | 0.0002767966418 | 0 | 0 | 0.000437772997  | 0 |
| 0.0000015003  | 0.00000298393 | 0.0002799067164 | 0 | 0 | 0.0004427195846 | 0 |
| 0.00000151697 | 0.0000030006  | 0.000283016791  | 0 | 0 | 0.0004451928783 | 0 |
| 0.00000153364 | 0.00000303394 | 0.0002861268657 | 0 | 0 | 0.0004501394659 | 0 |
| 0.00000155031 | 0.00000308395 | 0.0002892369403 | 0 | 0 | 0.0004575593472 | 0 |
| 0.00000156698 | 0.00000311729 | 0.0002923470149 | 0 | 0 | 0.0004625059347 | 0 |
| 0.00000158365 | 0.00000315063 | 0.0002954570896 | 0 | 0 | 0.0004674525223 | 0 |
| 0.00000160032 | 0.0000031673  | 0.0002985671642 | 0 | 0 | 0.000469925816  | 0 |
| 0.00000161699 | 0.00000320064 | 0.0003016772388 | 0 | 0 | 0.0004748724036 | 0 |
| 0.00000163366 | 0.00000323398 | 0.0003047873134 | 0 | 0 | 0.0004798189911 | 0 |
| 0.00000165033 | 0.00000326732 | 0.0003078973881 | 0 | 0 | 0.0004847655786 | 0 |
| 0.000001667   | 0.00000330066 | 0.0003110074627 | 0 | 0 | 0.0004897121662 | 0 |
| 0.00000168367 | 0.000003334   | 0.0003141175373 | 0 | 0 | 0.0004946587537 | 0 |
| 0.00000170034 | 0.00000336734 | 0.0003172276119 | 0 | 0 | 0.0004996053412 | 0 |
| 0.00000171701 | 0.00000338401 | 0.0003203376866 | 0 | 0 | 0.000502078635  | 0 |
| 0.00000173368 | 0.00000343402 | 0.0003234477612 | 0 | 0 | 0.0005094985163 | 0 |
| 0.00000175035 | 0.00000348403 | 0.0003265578358 | 0 | 0 | 0.0005169183976 | 0 |
| 0.00000176702 | 0.0000035007  | 0.0003296679104 | 0 | 0 | 0.0005193916914 | 0 |
| 0.00000178369 | 0.00000355071 | 0.0003327779851 | 0 | 0 | 0.0005268115727 | 0 |
| 0.00000180036 | 0.00000356738 | 0.0003358880597 | 0 | 0 | 0.0005292848665 | 0 |
| 0.00000181703 | 0.00000358405 | 0.0003389981343 | 0 | 0 | 0.0005317581602 | 0 |
| 0.0000018337  | 0.00000361739 | 0.000342108209  | 0 | 0 | 0.0005367047478 | 0 |
| 0.00000185037 | 0.0000036674  | 0.0003452182836 | 0 | 0 | 0.0005441246291 | 0 |
| 0.00000186704 | 0.00000370074 | 0.0003483283582 | 0 | 0 | 0.0005490712166 | 0 |
| 0.00000188371 | 0.00000371741 | 0.0003514384328 | 0 | 0 | 0.0005515445104 | 0 |
| 0.00000190038 | 0.00000375075 | 0.0003545485075 | 0 | 0 | 0.0005564910979 | 0 |
| 0.00000191705 | 0.00000378409 | 0.0003576585821 | 0 | 0 | 0.0005614376855 | 0 |
| 0.00000193372 | 0.00000381743 | 0.0003607686567 | 0 | 0 | 0.000566384273  | 0 |
| 0.00000195039 | 0.0000038341  | 0.0003638787313 | 0 | 0 | 0.0005688575668 | 0 |
| 0.00000196706 | 0.00000386744 | 0.000366988806  | 0 | 0 | 0.0005738041543 | 0 |
| 0.00000198373 | 0.00000390078 | 0.0003700988806 | 0 | 0 | 0.0005787507418 | 0 |
| 0.0000020004  | 0.00000395079 | 0.0003732089552 | 0 | 0 | 0.0005861706231 | 0 |

|               |               |                 |   |   |                 |   |
|---------------|---------------|-----------------|---|---|-----------------|---|
| 0.00000201707 | 0.00000398413 | 0.0003763190299 | 0 | 0 | 0.0005911172107 | 0 |
| 0.00000203374 | 0.0000040008  | 0.0003794291045 | 0 | 0 | 0.0005935905045 | 0 |
| 0.00000205041 | 0.00000403414 | 0.0003825391791 | 0 | 0 | 0.000598537092  | 0 |
| 0.00000206708 | 0.00000406748 | 0.0003856492537 | 0 | 0 | 0.0006034836795 | 0 |
| 0.00000208375 | 0.00000411749 | 0.0003887593284 | 0 | 0 | 0.0006109035608 | 0 |
| 0.00000210042 | 0.00000413416 | 0.000391869403  | 0 | 0 | 0.0006133768546 | 0 |
| 0.00000211709 | 0.0000041675  | 0.0003949794776 | 0 | 0 | 0.0006183234421 | 0 |
| 0.00000213376 | 0.00000420084 | 0.0003980895522 | 0 | 0 | 0.0006232700297 | 0 |
| 0.00000215043 | 0.00000421751 | 0.0004011996269 | 0 | 0 | 0.0006257433234 | 0 |
| 0.0000021671  | 0.00000425085 | 0.0004043097015 | 0 | 0 | 0.000630689911  | 0 |
| 0.00000218377 | 0.00000428419 | 0.0004074197761 | 0 | 0 | 0.0006356364985 | 0 |
| 0.00000220044 | 0.00000431753 | 0.0004105298507 | 0 | 0 | 0.0006405830861 | 0 |
| 0.00000221711 | 0.00000435087 | 0.0004136399254 | 0 | 0 | 0.0006455296736 | 0 |
| 0.00000223378 | 0.00000440088 | 0.00041675      | 0 | 0 | 0.0006529495549 | 0 |
| 0.00000225045 | 0.00000443422 | 0.0004198600746 | 0 | 0 | 0.0006578961424 | 0 |
| 0.00000226712 | 0.00000446756 | 0.0004229701493 | 0 | 0 | 0.00066284273   | 0 |
| 0.00000228379 | 0.0000045009  | 0.0004260802239 | 0 | 0 | 0.0006677893175 | 0 |
| 0.00000230046 | 0.00000453424 | 0.0004291902985 | 0 | 0 | 0.000672735905  | 0 |
| 0.00000231713 | 0.00000456758 | 0.0004323003731 | 0 | 0 | 0.0006776824926 | 0 |
| 0.0000023338  | 0.00000461759 | 0.0004354104478 | 0 | 0 | 0.0006851023739 | 0 |
| 0.00000235047 | 0.00000465093 | 0.0004385205224 | 0 | 0 | 0.0006900489614 | 0 |
| 0.00000236714 | 0.00000468427 | 0.000441630597  | 0 | 0 | 0.000694995549  | 0 |
| 0.00000238381 | 0.00000471761 | 0.0004447406716 | 0 | 0 | 0.0006999421365 | 0 |
| 0.00000240048 | 0.00000475095 | 0.0004478507463 | 0 | 0 | 0.000704888724  | 0 |
| 0.00000241715 | 0.00000480096 | 0.0004509608209 | 0 | 0 | 0.0007123086053 | 0 |
| 0.00000243382 | 0.0000048343  | 0.0004540708955 | 0 | 0 | 0.0007172551929 | 0 |
| 0.00000245049 | 0.00000485097 | 0.0004571809701 | 0 | 0 | 0.0007197284866 | 0 |
| 0.00000246716 | 0.00000488431 | 0.0004602910448 | 0 | 0 | 0.0007246750742 | 0 |
| 0.00000248383 | 0.00000493432 | 0.0004634011194 | 0 | 0 | 0.0007320949555 | 0 |
| 0.0000025005  | 0.00000495099 | 0.000466511194  | 0 | 0 | 0.0007345682493 | 0 |
| 0.00000251717 | 0.00000496766 | 0.0004696212687 | 0 | 0 | 0.000737041543  | 0 |
| 0.00000253384 | 0.000005001   | 0.0004727313433 | 0 | 0 | 0.0007419881306 | 0 |
| 0.00000255051 | 0.00000505101 | 0.0004758414179 | 0 | 0 | 0.0007494080119 | 0 |
| 0.00000256718 | 0.00000508435 | 0.0004789514925 | 0 | 0 | 0.0007543545994 | 0 |
| 0.00000258385 | 0.00000513436 | 0.0004820615672 | 0 | 0 | 0.0007617744807 | 0 |
| 0.00000260052 | 0.00000515103 | 0.0004851716418 | 0 | 0 | 0.0007642477745 | 0 |
| 0.00000261719 | 0.0000051677  | 0.0004882817164 | 0 | 0 | 0.0007667210682 | 0 |
| 0.00000263386 | 0.00000523438 | 0.000491391791  | 0 | 0 | 0.0007766142433 | 0 |
| 0.00000265053 | 0.00000525105 | 0.0004945018657 | 0 | 0 | 0.0007790875371 | 0 |
| 0.0000026672  | 0.00000530106 | 0.0004976119403 | 0 | 0 | 0.0007865074184 | 0 |

|               |               |                 |   |   |                 |   |
|---------------|---------------|-----------------|---|---|-----------------|---|
| 0.00000268387 | 0.00000531773 | 0.0005007220149 | 0 | 0 | 0.0007889807122 | 0 |
| 0.00000270054 | 0.00000535107 | 0.0005038320896 | 0 | 0 | 0.0007939272997 | 0 |
| 0.00000271721 | 0.00000536774 | 0.0005069421642 | 0 | 0 | 0.0007964005935 | 0 |
| 0.00000273388 | 0.00000540108 | 0.0005100522388 | 0 | 0 | 0.000801347181  | 0 |
| 0.00000275055 | 0.00000545109 | 0.0005131623134 | 0 | 0 | 0.0008087670623 | 0 |
| 0.00000276722 | 0.00000546776 | 0.0005162723881 | 0 | 0 | 0.0008112403561 | 0 |
| 0.00000278389 | 0.00000548443 | 0.0005193824627 | 0 | 0 | 0.0008137136499 | 0 |
| 0.00000280056 | 0.00000551777 | 0.0005224925373 | 0 | 0 | 0.0008186602374 | 0 |
| 0.00000281723 | 0.00000555111 | 0.0005256026119 | 0 | 0 | 0.0008236068249 | 0 |
| 0.0000028339  | 0.00000560112 | 0.0005287126866 | 0 | 0 | 0.0008310267062 | 0 |
| 0.00000285057 | 0.00000561779 | 0.0005318227612 | 0 | 0 | 0.0008335       | 0 |
| 0.00000286724 | 0.00000565113 | 0.0005349328358 | 0 | 0 | 0.0008384465875 | 0 |
| 0.00000288391 | 0.00000568447 | 0.0005380429104 | 0 | 0 | 0.0008433931751 | 0 |
| 0.00000290058 | 0.00000571781 | 0.0005411529851 | 0 | 0 | 0.0008483397626 | 0 |
| 0.00000291725 | 0.00000575115 | 0.0005442630597 | 0 | 0 | 0.0008532863501 | 0 |
| 0.00000293392 | 0.00000578449 | 0.0005473731343 | 0 | 0 | 0.0008582329377 | 0 |
| 0.00000295059 | 0.00000581783 | 0.000550483209  | 0 | 0 | 0.0008631795252 | 0 |
| 0.00000296726 | 0.00000585117 | 0.0005535932836 | 0 | 0 | 0.0008681261128 | 0 |
| 0.00000298393 | 0.00000590118 | 0.0005567033582 | 0 | 0 | 0.0008755459941 | 0 |
| 0.0000030006  | 0.00000593452 | 0.0005598134328 | 0 | 0 | 0.0008804925816 | 0 |
| 0.00000301727 | 0.00000596786 | 0.0005629235075 | 0 | 0 | 0.0008854391691 | 0 |
| 0.00000303394 | 0.00000598453 | 0.0005660335821 | 0 | 0 | 0.0008879124629 | 0 |
| 0.00000305061 | 0.0000060012  | 0.0005691436567 | 0 | 0 | 0.0008903857567 | 0 |
| 0.00000306728 | 0.00000605121 | 0.0005722537313 | 0 | 0 | 0.000897805638  | 0 |
| 0.00000308395 | 0.00000610122 | 0.000575363806  | 0 | 0 | 0.0009052255193 | 0 |
| 0.00000310062 | 0.00000613456 | 0.0005784738806 | 0 | 0 | 0.0009101721068 | 0 |
| 0.00000311729 | 0.0000061679  | 0.0005815839552 | 0 | 0 | 0.0009151186944 | 0 |
| 0.00000313396 | 0.00000620124 | 0.0005846940299 | 0 | 0 | 0.0009200652819 | 0 |
| 0.00000315063 | 0.00000623458 | 0.0005878041045 | 0 | 0 | 0.0009250118694 | 0 |
| 0.0000031673  | 0.00000628459 | 0.0005909141791 | 0 | 0 | 0.0009324317507 | 0 |
| 0.00000318397 | 0.00000630126 | 0.0005940242537 | 0 | 0 | 0.0009349050445 | 0 |
| 0.00000320064 | 0.0000063346  | 0.0005971343284 | 0 | 0 | 0.000939851632  | 0 |
| 0.00000321731 | 0.00000635127 | 0.000600244403  | 0 | 0 | 0.0009423249258 | 0 |
| 0.00000323398 | 0.00000640128 | 0.0006033544776 | 0 | 0 | 0.0009497448071 | 0 |
| 0.00000325065 | 0.00000641795 | 0.0006064645522 | 0 | 0 | 0.0009522181009 | 0 |
| 0.00000326732 | 0.00000646796 | 0.0006095746269 | 0 | 0 | 0.0009596379822 | 0 |
| 0.00000328399 | 0.0000065013  | 0.0006126847015 | 0 | 0 | 0.0009645845697 | 0 |
| 0.00000330066 | 0.00000653464 | 0.0006157947761 | 0 | 0 | 0.0009695311573 | 0 |
| 0.00000331733 | 0.00000658465 | 0.0006189048507 | 0 | 0 | 0.0009769510386 | 0 |
| 0.000003334   | 0.00000661799 | 0.0006220149254 | 0 | 0 | 0.0009818976261 | 0 |

|               |               |                 |   |   |                 |   |
|---------------|---------------|-----------------|---|---|-----------------|---|
| 0.00000335067 | 0.00000663466 | 0.000625125     | 0 | 0 | 0.0009843709199 | 0 |
| 0.00000336734 | 0.00000668467 | 0.0006282350746 | 0 | 0 | 0.0009917908012 | 0 |
| 0.00000338401 | 0.00000671801 | 0.0006313451493 | 0 | 0 | 0.0009967373887 | 0 |
| 0.00000340068 | 0.00000675135 | 0.0006344552239 | 0 | 0 | 0.001001683976  | 0 |
| 0.00000341735 | 0.00000678469 | 0.0006375652985 | 0 | 0 | 0.001006630564  | 0 |
| 0.00000343402 | 0.00000681803 | 0.0006406753731 | 0 | 0 | 0.001011577151  | 0 |
| 0.00000345069 | 0.00000685137 | 0.0006437854478 | 0 | 0 | 0.001016523739  | 0 |
| 0.00000346736 | 0.00000686804 | 0.0006468955224 | 0 | 0 | 0.001018997033  | 0 |
| 0.00000348403 | 0.00000690138 | 0.000650005597  | 0 | 0 | 0.00102394362   | 0 |
| 0.0000035007  | 0.00000693472 | 0.0006531156716 | 0 | 0 | 0.001028890208  | 0 |
| 0.00000351737 | 0.00000696806 | 0.0006562257463 | 0 | 0 | 0.001033836795  | 0 |
| 0.00000353404 | 0.00000698473 | 0.0006593358209 | 0 | 0 | 0.001036310089  | 0 |
| 0.00000355071 | 0.0000070014  | 0.0006624458955 | 0 | 0 | 0.001038783383  | 0 |
| 0.00000356738 | 0.00000703474 | 0.0006655559701 | 0 | 0 | 0.00104372997   | 0 |
| 0.00000358405 | 0.00000708475 | 0.0006686660448 | 0 | 0 | 0.001051149852  | 0 |
| 0.00000360072 | 0.00000713476 | 0.0006717761194 | 0 | 0 | 0.001058569733  | 0 |
| 0.00000361739 | 0.0000071681  | 0.000674886194  | 0 | 0 | 0.00106351632   | 0 |
| 0.00000363406 | 0.00000720144 | 0.0006779962687 | 0 | 0 | 0.001068462908  | 0 |
| 0.00000365073 | 0.00000723478 | 0.0006811063433 | 0 | 0 | 0.001073409496  | 0 |
| 0.0000036674  | 0.00000728479 | 0.0006842164179 | 0 | 0 | 0.001080829377  | 0 |
| 0.00000368407 | 0.00000730146 | 0.0006873264925 | 0 | 0 | 0.001083302671  | 0 |
| 0.00000370074 | 0.0000073348  | 0.0006904365672 | 0 | 0 | 0.001088249258  | 0 |
| 0.00000371741 | 0.00000738481 | 0.0006935466418 | 0 | 0 | 0.001095669139  | 0 |
| 0.00000373408 | 0.00000741815 | 0.0006966567164 | 0 | 0 | 0.001100615727  | 0 |
| 0.00000375075 | 0.00000745149 | 0.000699766791  | 0 | 0 | 0.001105562315  | 0 |
| 0.00000376742 | 0.00000748483 | 0.0007028768657 | 0 | 0 | 0.001110508902  | 0 |
| 0.00000378409 | 0.00000751817 | 0.0007059869403 | 0 | 0 | 0.00111545549   | 0 |
| 0.00000380076 | 0.00000755151 | 0.0007090970149 | 0 | 0 | 0.001120402077  | 0 |
| 0.00000381743 | 0.00000760152 | 0.0007122070896 | 0 | 0 | 0.001127821958  | 0 |
| 0.0000038341  | 0.00000763486 | 0.0007153171642 | 0 | 0 | 0.001132768546  | 0 |
| 0.00000385077 | 0.0000076682  | 0.0007184272388 | 0 | 0 | 0.001137715134  | 0 |
| 0.00000386744 | 0.00000770154 | 0.0007215373134 | 0 | 0 | 0.001142661721  | 0 |
| 0.00000388411 | 0.00000771821 | 0.0007246473881 | 0 | 0 | 0.001145135015  | 0 |
| 0.00000390078 | 0.00000776822 | 0.0007277574627 | 0 | 0 | 0.001152554896  | 0 |
| 0.00000391745 | 0.00000780156 | 0.0007308675373 | 0 | 0 | 0.001157501484  | 0 |
| 0.00000393412 | 0.00000785157 | 0.0007339776119 | 0 | 0 | 0.001164921365  | 0 |
| 0.00000395079 | 0.00000788491 | 0.0007370876866 | 0 | 0 | 0.001169867953  | 0 |
| 0.00000396746 | 0.00000791825 | 0.0007401977612 | 0 | 0 | 0.00117481454   | 0 |
| 0.00000398413 | 0.00000793492 | 0.0007433078358 | 0 | 0 | 0.001177287834  | 0 |
| 0.0000040008  | 0.00000796826 | 0.0007464179104 | 0 | 0 | 0.001182234421  | 0 |

|               |               |                 |   |   |                |   |
|---------------|---------------|-----------------|---|---|----------------|---|
| 0.00000401747 | 0.0000080016  | 0.0007495279851 | 0 | 0 | 0.001187181009 | 0 |
| 0.00000403414 | 0.00000805161 | 0.0007526380597 | 0 | 0 | 0.00119460089  | 0 |
| 0.00000405081 | 0.00000806828 | 0.0007557481343 | 0 | 0 | 0.001197074184 | 0 |
| 0.00000406748 | 0.00000808495 | 0.000758858209  | 0 | 0 | 0.001199547478 | 0 |
| 0.00000408415 | 0.00000811829 | 0.0007619682836 | 0 | 0 | 0.001204494065 | 0 |
| 0.00000410082 | 0.00000815163 | 0.0007650783582 | 0 | 0 | 0.001209440653 | 0 |
| 0.00000411749 | 0.00000820164 | 0.0007681884328 | 0 | 0 | 0.001216860534 | 0 |
| 0.00000413416 | 0.00000823498 | 0.0007712985075 | 0 | 0 | 0.001221807122 | 0 |
| 0.00000415083 | 0.00000825165 | 0.0007744085821 | 0 | 0 | 0.001224280415 | 0 |
| 0.0000041675  | 0.00000828499 | 0.0007775186567 | 0 | 0 | 0.001229227003 | 0 |
| 0.00000418417 | 0.00000831833 | 0.0007806287313 | 0 | 0 | 0.001234173591 | 0 |
| 0.00000420084 | 0.00000835167 | 0.000783738806  | 0 | 0 | 0.001239120178 | 0 |
| 0.00000421751 | 0.00000838501 | 0.0007868488806 | 0 | 0 | 0.001244066766 | 0 |
| 0.00000423418 | 0.00000841835 | 0.0007899589552 | 0 | 0 | 0.001249013353 | 0 |
| 0.00000425085 | 0.00000846836 | 0.0007930690299 | 0 | 0 | 0.001256433234 | 0 |
| 0.00000426752 | 0.000008335   | 0.0007961791045 | 0 | 0 | 0.001236646884 | 0 |
| 0.00000428419 | 0.00000853504 | 0.0007992891791 | 0 | 0 | 0.001266326409 | 0 |
| 0.00000430086 | 0.00000856838 | 0.0008023992537 | 0 | 0 | 0.001271272997 | 0 |
| 0.00000431753 | 0.00000861839 | 0.0008055093284 | 0 | 0 | 0.001278692878 | 0 |
| 0.0000043342  | 0.00000865173 | 0.000808619403  | 0 | 0 | 0.001283639466 | 0 |
| 0.00000435087 | 0.0000086684  | 0.0008117294776 | 0 | 0 | 0.00128611276  | 0 |
| 0.00000436754 | 0.00000870174 | 0.0008148395522 | 0 | 0 | 0.001291059347 | 0 |
| 0.00000438421 | 0.00000871841 | 0.0008179496269 | 0 | 0 | 0.001293532641 | 0 |
| 0.00000440088 | 0.00000875175 | 0.0008210597015 | 0 | 0 | 0.001298479228 | 0 |
| 0.00000441755 | 0.00000878509 | 0.0008241697761 | 0 | 0 | 0.001303425816 | 0 |
| 0.00000443422 | 0.00000881843 | 0.0008272798507 | 0 | 0 | 0.001308372404 | 0 |
| 0.00000445089 | 0.00000885177 | 0.0008303899254 | 0 | 0 | 0.001313318991 | 0 |
| 0.00000446756 | 0.00000890178 | 0.0008335       | 0 | 0 | 0.001320738872 | 0 |
| 0.00000448423 | 0.00000893512 | 0.0008366100746 | 0 | 0 | 0.00132568546  | 0 |
| 0.0000045009  | 0.00000896846 | 0.0008397201493 | 0 | 0 | 0.001330632047 | 0 |
| 0.00000451757 | 0.0000090018  | 0.0008428302239 | 0 | 0 | 0.001335578635 | 0 |
| 0.00000453424 | 0.00000905181 | 0.0008459402985 | 0 | 0 | 0.001342998516 | 0 |
| 0.00000455091 | 0.00000906848 | 0.0008490503731 | 0 | 0 | 0.00134547181  | 0 |
| 0.00000456758 | 0.00000910182 | 0.0008521604478 | 0 | 0 | 0.001350418398 | 0 |
| 0.00000458425 | 0.00000913516 | 0.0008552705224 | 0 | 0 | 0.001355364985 | 0 |
| 0.00000460092 | 0.0000091685  | 0.000858380597  | 0 | 0 | 0.001360311573 | 0 |
| 0.00000461759 | 0.00000920184 | 0.0008614906716 | 0 | 0 | 0.00136525816  | 0 |
| 0.00000463426 | 0.00000923518 | 0.0008646007463 | 0 | 0 | 0.001370204748 | 0 |
| 0.00000465093 | 0.00000926852 | 0.0008677108209 | 0 | 0 | 0.001375151335 | 0 |
| 0.0000046676  | 0.00000930186 | 0.0008708208955 | 0 | 0 | 0.001380097923 | 0 |

|               |               |                 |   |   |                |   |
|---------------|---------------|-----------------|---|---|----------------|---|
| 0.00000468427 | 0.0000093352  | 0.0008739309701 | 0 | 0 | 0.00138504451  | 0 |
| 0.00000470094 | 0.00000936854 | 0.0008770410448 | 0 | 0 | 0.001389991098 | 0 |
| 0.00000471761 | 0.00000938521 | 0.0008801511194 | 0 | 0 | 0.001392464392 | 0 |
| 0.00000473428 | 0.00000941855 | 0.000883261194  | 0 | 0 | 0.001397410979 | 0 |
| 0.00000475095 | 0.00000945189 | 0.0008863712687 | 0 | 0 | 0.001402357567 | 0 |
| 0.00000476762 | 0.00000948523 | 0.0008894813433 | 0 | 0 | 0.001407304154 | 0 |
| 0.00000478429 | 0.00000951857 | 0.0008925914179 | 0 | 0 | 0.001412250742 | 0 |
| 0.00000480096 | 0.00000955191 | 0.0008957014925 | 0 | 0 | 0.001417197329 | 0 |
| 0.00000481763 | 0.00000958525 | 0.0008988115672 | 0 | 0 | 0.001422143917 | 0 |
| 0.0000048343  | 0.00000961859 | 0.0009019216418 | 0 | 0 | 0.001427090504 | 0 |
| 0.00000485097 | 0.00000965193 | 0.0009050317164 | 0 | 0 | 0.001432037092 | 0 |
| 0.00000486764 | 0.00000968527 | 0.000908141791  | 0 | 0 | 0.00143698368  | 0 |
| 0.00000488431 | 0.00000971861 | 0.0009112518657 | 0 | 0 | 0.001441930267 | 0 |
| 0.00000490098 | 0.00000975195 | 0.0009143619403 | 0 | 0 | 0.001446876855 | 0 |
| 0.00000491765 | 0.00000978529 | 0.0009174720149 | 0 | 0 | 0.001451823442 | 0 |
| 0.00000493432 | 0.00000981863 | 0.0009205820896 | 0 | 0 | 0.00145677003  | 0 |
| 0.00000495099 | 0.00000985197 | 0.0009236921642 | 0 | 0 | 0.001461716617 | 0 |
| 0.00000496766 | 0.00000990198 | 0.0009268022388 | 0 | 0 | 0.001469136499 | 0 |
| 0.00000498433 | 0.00000993532 | 0.0009299123134 | 0 | 0 | 0.001474083086 | 0 |
| 0.000005001   | 0.00000996866 | 0.0009330223881 | 0 | 0 | 0.001479029674 | 0 |
| 0.00000501767 | 0.000010002   | 0.0009361324627 | 0 | 0 | 0.001483976261 | 0 |
| 0.00000503434 | 0.00001003534 | 0.0009392425373 | 0 | 0 | 0.001488922849 | 0 |
| 0.00000505101 | 0.00001006868 | 0.0009423526119 | 0 | 0 | 0.001493869436 | 0 |
| 0.00000506768 | 0.00001010202 | 0.0009454626866 | 0 | 0 | 0.001498816024 | 0 |
| 0.00000508435 | 0.00001013536 | 0.0009485727612 | 0 | 0 | 0.001503762611 | 0 |
| 0.00000510102 | 0.00001015203 | 0.0009516828358 | 0 | 0 | 0.001506235905 | 0 |
| 0.00000511769 | 0.00001020204 | 0.0009547929104 | 0 | 0 | 0.001513655786 | 0 |
| 0.00000513436 | 0.00001025205 | 0.0009579029851 | 0 | 0 | 0.001521075668 | 0 |
| 0.00000515103 | 0.00001028539 | 0.0009610130597 | 0 | 0 | 0.001526022255 | 0 |
| 0.0000051677  | 0.00001031873 | 0.0009641231343 | 0 | 0 | 0.001530968843 | 0 |
| 0.00000518437 | 0.0000103354  | 0.000967233209  | 0 | 0 | 0.001533442136 | 0 |
| 0.00000520104 | 0.00001036874 | 0.0009703432836 | 0 | 0 | 0.001538388724 | 0 |
| 0.00000521771 | 0.00001040208 | 0.0009734533582 | 0 | 0 | 0.001543335312 | 0 |
| 0.00000523438 | 0.00001043542 | 0.0009765634328 | 0 | 0 | 0.001548281899 | 0 |
| 0.00000525105 | 0.00001046876 | 0.0009796735075 | 0 | 0 | 0.001553228487 | 0 |
| 0.00000526772 | 0.0000105021  | 0.0009827835821 | 0 | 0 | 0.001558175074 | 0 |
| 0.00000528439 | 0.00001053544 | 0.0009858936567 | 0 | 0 | 0.001563121662 | 0 |
| 0.00000530106 | 0.00001056878 | 0.0009890037313 | 0 | 0 | 0.001568068249 | 0 |
| 0.00000531773 | 0.00001060212 | 0.000992113806  | 0 | 0 | 0.001573014837 | 0 |
| 0.0000053344  | 0.00001063546 | 0.0009952238806 | 0 | 0 | 0.001577961424 | 0 |



|               |               |                 |   |   |                |   |
|---------------|---------------|-----------------|---|---|----------------|---|
| 0.00000535107 | 0.0000106688  | 0.0009983339552 | 0 | 0 | 0.001582908012 | 0 |
| 0.00000536774 | 0.00001071881 | 0.00100144403   | 0 | 0 | 0.001590327893 | 0 |
| 0.00000538441 | 0.00001073548 | 0.001004554104  | 0 | 0 | 0.001592801187 | 0 |
| 0.00000540108 | 0.00001076882 | 0.001007664179  | 0 | 0 | 0.001597747774 | 0 |
| 0.00000541775 | 0.00001078549 | 0.001010774254  | 0 | 0 | 0.001600221068 | 0 |
| 0.00000543442 | 0.00001081883 | 0.001013884328  | 0 | 0 | 0.001605167656 | 0 |
| 0.00000545109 | 0.00001085217 | 0.001016994403  | 0 | 0 | 0.001610114243 | 0 |
| 0.00000546776 | 0.00001088551 | 0.001020104478  | 0 | 0 | 0.001615060831 | 0 |
| 0.00000548443 | 0.00001091885 | 0.001023214552  | 0 | 0 | 0.001620007418 | 0 |
| 0.0000055011  | 0.00001095219 | 0.001026324627  | 0 | 0 | 0.001624954006 | 0 |
| 0.00000551777 | 0.00001098553 | 0.001029434701  | 0 | 0 | 0.001629900593 | 0 |
| 0.00000553444 | 0.00001101887 | 0.001032544776  | 0 | 0 | 0.001634847181 | 0 |
| 0.00000555111 | 0.00001105221 | 0.001035654851  | 0 | 0 | 0.001639793769 | 0 |
| 0.00000556778 | 0.00001108555 | 0.001038764925  | 0 | 0 | 0.001644740356 | 0 |
| 0.00000558445 | 0.00001113556 | 0.001041875     | 0 | 0 | 0.001652160237 | 0 |
| 0.00000560112 | 0.0000111689  | 0.001044985075  | 0 | 0 | 0.001657106825 | 0 |
| 0.00000561779 | 0.00001118557 | 0.001048095149  | 0 | 0 | 0.001659580119 | 0 |
| 0.00000563446 | 0.00001121891 | 0.001051205224  | 0 | 0 | 0.001664526706 | 0 |
| 0.00000565113 | 0.00001126892 | 0.001054315299  | 0 | 0 | 0.001671946588 | 0 |
| 0.0000056678  | 0.00001131893 | 0.001057425373  | 0 | 0 | 0.001679366469 | 0 |
| 0.00000568447 | 0.0000113356  | 0.001060535448  | 0 | 0 | 0.001681839763 | 0 |
| 0.00000570114 | 0.00001136894 | 0.001063645522  | 0 | 0 | 0.00168678635  | 0 |
| 0.00000571781 | 0.00001141895 | 0.001066755597  | 0 | 0 | 0.001694206231 | 0 |
| 0.00000573448 | 0.00001145229 | 0.001069865672  | 0 | 0 | 0.001699152819 | 0 |
| 0.00000575115 | 0.00001148563 | 0.001072975746  | 0 | 0 | 0.001704099407 | 0 |
| 0.00000576782 | 0.0000115023  | 0.001076085821  | 0 | 0 | 0.0017065727   | 0 |
| 0.00000578449 | 0.00001151897 | 0.001079195896  | 0 | 0 | 0.001709045994 | 0 |
| 0.00000580116 | 0.00001155231 | 0.00108230597   | 0 | 0 | 0.001713992582 | 0 |
| 0.00000581783 | 0.00001161899 | 0.001085416045  | 0 | 0 | 0.001723885757 | 0 |
| 0.0000058345  | 0.00001165233 | 0.001088526119  | 0 | 0 | 0.001728832344 | 0 |
| 0.00000585117 | 0.00001168567 | 0.001091636194  | 0 | 0 | 0.001733778932 | 0 |
| 0.00000586784 | 0.00001171901 | 0.001094746269  | 0 | 0 | 0.001738725519 | 0 |
| 0.00000588451 | 0.00001173568 | 0.001097856343  | 0 | 0 | 0.001741198813 | 0 |
| 0.00000590118 | 0.00001176902 | 0.001100966418  | 0 | 0 | 0.001746145401 | 0 |
| 0.00000591785 | 0.00001180236 | 0.001104076493  | 0 | 0 | 0.001751091988 | 0 |
| 0.00000593452 | 0.0000118357  | 0.001107186567  | 0 | 0 | 0.001756038576 | 0 |
| 0.00000595119 | 0.00001186904 | 0.001110296642  | 0 | 0 | 0.001760985163 | 0 |
| 0.00000596786 | 0.00001190238 | 0.001113406716  | 0 | 0 | 0.001765931751 | 0 |
| 0.00000598453 | 0.00001193572 | 0.001116516791  | 0 | 0 | 0.001770878338 | 0 |
| 0.0000060012  | 0.00001196906 | 0.001119626866  | 0 | 0 | 0.001775824926 | 0 |

|               |               |                |   |                       |                |                       |
|---------------|---------------|----------------|---|-----------------------|----------------|-----------------------|
| 0.00000601787 | 0.0000120024  | 0.00112273694  | 0 | 0                     | 0.001780771513 | 0                     |
| 0.00000603454 | 0.00001201907 | 0.001125847015 | 0 | 0                     | 0.001783244807 | 0                     |
| 0.00000605121 | 0.00001205241 | 0.00112895709  | 0 | 0                     | 0.001788191395 | 0                     |
| 0.00000606788 | 0.00001208575 | 0.001132067164 | 0 | 0                     | 0.001793137982 | 0                     |
| 0.00000608455 | 0.00001211909 | 0.001135177239 | 0 | 0                     | 0.00179808457  | 0.0000000001002248743 |
| 0.00000610122 | 0.00001215243 | 0.001138287313 | 0 | 0.0000000001001820324 | 0.001803031157 | 0.0000000001005005961 |
| 0.00000611789 | 0.00001218577 | 0.001141397388 | 0 | 0.0000000001004557538 | 0.001807977745 | 0.0000000001007763179 |
| 0.00000613456 | 0.00001223578 | 0.001144507463 | 0 | 0.0000000001007294752 | 0.001815397626 | 0.0000000001011899006 |
| 0.00000615123 | 0.00001226912 | 0.001147617537 | 0 | 0.0000000001010031966 | 0.001820344214 | 0.0000000001014656224 |
| 0.0000061679  | 0.00001231913 | 0.001150727612 | 0 | 0.000000000101276918  | 0.001827764095 | 0.0000000001018792051 |
| 0.00000618457 | 0.0000123358  | 0.001153837687 | 0 | 0.0000000001015506394 | 0.001830237389 | 0.000000000102017066  |
| 0.00000620124 | 0.00001236914 | 0.001156947761 | 0 | 0.0000000001018243608 | 0.001835183976 | 0.0000000001022927878 |
| 0.00000621791 | 0.00001240248 | 0.001160057836 | 0 | 0.0000000001020980822 | 0.001840130564 | 0.0000000001025685096 |
| 0.00000623458 | 0.00001243582 | 0.00116316791  | 0 | 0.0000000001023718036 | 0.001845077151 | 0.0000000001028442314 |
| 0.00000625125 | 0.00001246916 | 0.001166277985 | 0 | 0.000000000102645525  | 0.001850023739 | 0.0000000001031199532 |
| 0.00000626792 | 0.0000125025  | 0.00116938806  | 0 | 0.0000000001029192464 | 0.001854970326 | 0.000000000103395675  |
| 0.00000628459 | 0.00001253584 | 0.001172498134 | 0 | 0.0000000001031929678 | 0.001859916914 | 0.0000000001036713968 |
| 0.00000630126 | 0.00001255251 | 0.001175608209 | 0 | 0.0000000001034666892 | 0.001862390208 | 0.0000000001038092577 |
| 0.00000631793 | 0.00001258585 | 0.001178718284 | 0 | 0.0000000001037404106 | 0.001867336795 | 0.0000000001040849795 |
| 0.0000063346  | 0.00001261919 | 0.001181828358 | 0 | 0.000000000104014132  | 0.001872283383 | 0.0000000001043607013 |
| 0.00000635127 | 0.00001265253 | 0.001184938433 | 0 | 0.0000000001042878534 | 0.00187722997  | 0.0000000001046364231 |
| 0.00000636794 | 0.00001268587 | 0.001188048507 | 0 | 0.0000000001045615748 | 0.001882176558 | 0.0000000001049121449 |
| 0.00000638461 | 0.00001271921 | 0.001191158582 | 0 | 0.0000000001048352962 | 0.001887123145 | 0.0000000001051878667 |
| 0.00000640128 | 0.00001275255 | 0.001194268657 | 0 | 0.0000000001051090176 | 0.001892069733 | 0.0000000001054635885 |
| 0.00000641795 | 0.00001280256 | 0.001197378731 | 0 | 0.000000000105382739  | 0.001899489614 | 0.0000000001058771712 |
| 0.00000643462 | 0.0000128359  | 0.001200488806 | 0 | 0.0000000001056564604 | 0.001904436202 | 0.000000000106152893  |
| 0.00000645129 | 0.00001288591 | 0.001203598881 | 0 | 0.0000000001059301818 | 0.001911856083 | 0.0000000001065664757 |
| 0.00000646796 | 0.00001290258 | 0.001206708955 | 0 | 0.0000000001062039032 | 0.001914329377 | 0.0000000001067043366 |
| 0.00000648463 | 0.00001293592 | 0.00120981903  | 0 | 0.0000000001064776246 | 0.001919275964 | 0.0000000001069800584 |
| 0.0000065013  | 0.00001296926 | 0.001212929104 | 0 | 0.000000000106751346  | 0.001924222552 | 0.0000000001072557802 |
| 0.00000651797 | 0.00001301927 | 0.001216039179 | 0 | 0.0000000001070250674 | 0.001931642433 | 0.0000000001076693629 |
| 0.00000653464 | 0.00001303594 | 0.001219149254 | 0 | 0.0000000001072987888 | 0.001934115727 | 0.0000000001078072238 |
| 0.00000655131 | 0.00001306928 | 0.001222259328 | 0 | 0.0000000001075725102 | 0.001939062315 | 0.0000000001080829456 |
| 0.00000656798 | 0.00001311929 | 0.001225369403 | 0 | 0.0000000001078462316 | 0.001946482196 | 0.0000000001084965283 |
| 0.00000658465 | 0.00001315263 | 0.001228479478 | 0 | 0.000000000108119953  | 0.001951428783 | 0.0000000001087722501 |
| 0.00000660132 | 0.00001318597 | 0.001231589552 | 0 | 0.0000000001083936744 | 0.001956375371 | 0.0000000001090479719 |
| 0.00000661799 | 0.00001321931 | 0.001234699627 | 0 | 0.0000000001086673958 | 0.001961321958 | 0.0000000001093236937 |
| 0.00000663466 | 0.00001323598 | 0.001237809701 | 0 | 0.0000000001089411172 | 0.001963795252 | 0.0000000001094615546 |
| 0.00000665133 | 0.00001328599 | 0.001240919776 | 0 | 0.0000000001092148386 | 0.001971215134 | 0.0000000001098751373 |
| 0.000006668   | 0.00001331933 | 0.001244029851 | 0 | 0.00000000010948856   | 0.001976161721 | 0.0000000001101508591 |

|               |               |                |                       |                       |                |                       |
|---------------|---------------|----------------|-----------------------|-----------------------|----------------|-----------------------|
| 0.00000668467 | 0.000013336   | 0.001247139925 | 0                     | 0.0000000001097622814 | 0.001978635015 | 0.00000000011028872   |
| 0.00000670134 | 0.00001336934 | 0.00125025     | 0                     | 0.0000000001100360028 | 0.001983581602 | 0.0000000001105644418 |
| 0.00000671801 | 0.00001340268 | 0.001253360075 | 0                     | 0.0000000001103097242 | 0.00198852819  | 0.0000000001108401636 |
| 0.00000673468 | 0.00001343602 | 0.001256470149 | 0                     | 0.0000000001105834456 | 0.001993474777 | 0.0000000001111158854 |
| 0.00000675135 | 0.00001346936 | 0.001259580224 | 0                     | 0.000000000110857167  | 0.001998421365 | 0.0000000001113916072 |
| 0.00000676802 | 0.00001348603 | 0.001262690299 | 0                     | 0.0000000001111308884 | 0.002000894659 | 0.0000000001115294681 |
| 0.00000678469 | 0.00001351937 | 0.001265800373 | 0                     | 0.0000000001114046098 | 0.002005841246 | 0.0000000001118051899 |
| 0.00000680136 | 0.00001356938 | 0.001268910448 | 0                     | 0.0000000001116783312 | 0.002013261128 | 0.0000000001122187726 |
| 0.00000681803 | 0.00001361939 | 0.001272020522 | 0                     | 0.0000000001119520526 | 0.002020681009 | 0.0000000001126323553 |
| 0.0000068347  | 0.00001365273 | 0.001275130597 | 0                     | 0.000000000112225774  | 0.002025627596 | 0.0000000001129080771 |
| 0.00000685137 | 0.00001368607 | 0.001278240672 | 0                     | 0.0000000001124994954 | 0.002030574184 | 0.0000000001131837989 |
| 0.00000686804 | 0.00001370274 | 0.001281350746 | 0                     | 0.0000000001127732168 | 0.002033047478 | 0.0000000001133216598 |
| 0.00000688471 | 0.00001373608 | 0.001284460821 | 0                     | 0.0000000001130469382 | 0.002037994065 | 0.0000000001135973816 |
| 0.00000690138 | 0.00001378609 | 0.001287570896 | 0                     | 0.0000000001133206596 | 0.002045413947 | 0.0000000001140109643 |
| 0.00000691805 | 0.00001380276 | 0.00129068097  | 0                     | 0.000000000113594381  | 0.00204788724  | 0.0000000001141488252 |
| 0.00000693472 | 0.0000138361  | 0.001293791045 | 0                     | 0.0000000001138681024 | 0.002052833828 | 0.000000000114424547  |
| 0.00000695139 | 0.00001388611 | 0.001296901119 | 0                     | 0.0000000001141418238 | 0.002060253709 | 0.0000000001148381297 |
| 0.00000696806 | 0.00001391945 | 0.001300011194 | 0                     | 0.0000000001144155452 | 0.002065200297 | 0.0000000001151138515 |
| 0.00000698473 | 0.00001395279 | 0.001303121269 | 0                     | 0.0000000001146892666 | 0.002070146884 | 0.0000000001153895733 |
| 0.0000070014  | 0.00001396946 | 0.001306231343 | 0                     | 0.000000000114962988  | 0.002072620178 | 0.0000000001155274342 |
| 0.00000701807 | 0.0000140028  | 0.001309341418 | 0                     | 0.0000000001152367094 | 0.002077566766 | 0.000000000115803156  |
| 0.00000703474 | 0.00001405281 | 0.001312451493 | 0                     | 0.0000000001155104308 | 0.002084986647 | 0.0000000001162167387 |
| 0.00000705141 | 0.00001408615 | 0.001315561567 | 0                     | 0.0000000001157841522 | 0.002089933234 | 0.0000000001164924605 |
| 0.00000706808 | 0.00001411949 | 0.001318671642 | 0                     | 0.0000000001160578736 | 0.002094879822 | 0.0000000001167681823 |
| 0.00000708475 | 0.00001415283 | 0.001321781716 | 0                     | 0.000000000116331595  | 0.002099826409 | 0.0000000001170439041 |
| 0.00000710142 | 0.0000141695  | 0.001324891791 | 0                     | 0.0000000001166053164 | 0.002102299703 | 0.000000000117181765  |
| 0.00000711809 | 0.00001420284 | 0.001328001866 | 0                     | 0.0000000001168790378 | 0.002107246291 | 0.0000000001174574868 |
| 0.00000713476 | 0.00001423618 | 0.00133111194  | 0                     | 0.0000000001171527592 | 0.002112192878 | 0.0000000001177332086 |
| 0.00000715143 | 0.00001426952 | 0.001334222015 | 0                     | 0.0000000001174264806 | 0.002117139466 | 0.0000000001180089304 |
| 0.0000071681  | 0.00001431953 | 0.00133733209  | 0                     | 0.000000000117700202  | 0.002124559347 | 0.0000000001184225131 |
| 0.00000718477 | 0.0000143362  | 0.001340442164 | 0                     | 0.0000000001179739234 | 0.002127032641 | 0.000000000118560374  |
| 0.00000720144 | 0.00001436954 | 0.001343552239 | 0.0000000001001720304 | 0.0000000001182476448 | 0.002131979228 | 0.0000000001188360958 |
| 0.00000721811 | 0.00001440288 | 0.001346662313 | 0.0000000001004039101 | 0.0000000001185213662 | 0.002136925816 | 0.0000000001191118176 |
| 0.00000723478 | 0.00001443622 | 0.001349772388 | 0.0000000001006357898 | 0.0000000001187950876 | 0.002141872404 | 0.0000000001193875394 |
| 0.00000725145 | 0.00001446956 | 0.001352882463 | 0.0000000001008676695 | 0.000000000119068809  | 0.002146818991 | 0.0000000001196632612 |
| 0.00000726812 | 0.00001451957 | 0.001355992537 | 0.0000000001010995492 | 0.0000000001193425304 | 0.002154238872 | 0.0000000001200768439 |
| 0.00000728479 | 0.00001455291 | 0.001359102612 | 0.0000000001013314289 | 0.0000000001196162518 | 0.00215918546  | 0.0000000001203525657 |
| 0.00000730146 | 0.00001458625 | 0.001362212687 | 0.0000000001015633086 | 0.0000000001198899732 | 0.002164132047 | 0.0000000001206282875 |
| 0.00000731813 | 0.00001461959 | 0.001365322761 | 0.0000000001017951883 | 0.0000000001201636946 | 0.002169078635 | 0.0000000001209040093 |
| 0.0000073348  | 0.00001465293 | 0.001368432836 | 0.000000000102027068  | 0.000000000120437416  | 0.002174025223 | 0.0000000001211797311 |

|               |               |                |                       |                       |                |                       |
|---------------|---------------|----------------|-----------------------|-----------------------|----------------|-----------------------|
| 0.00000735147 | 0.00001468627 | 0.00137154291  | 0.0000000001022589477 | 0.0000000001207111374 | 0.00217897181  | 0.0000000001214554529 |
| 0.00000736814 | 0.00001470294 | 0.001374652985 | 0.0000000001024908274 | 0.0000000001209848588 | 0.002181445104 | 0.0000000001215933138 |
| 0.00000738481 | 0.00001475295 | 0.00137776306  | 0.0000000001027227071 | 0.0000000001212585802 | 0.002188864985 | 0.0000000001220068965 |
| 0.00000740148 | 0.00001478629 | 0.001380873134 | 0.0000000001029545868 | 0.0000000001215323016 | 0.002193811573 | 0.0000000001222826183 |
| 0.00000741815 | 0.00001481963 | 0.001383983209 | 0.0000000001031864665 | 0.000000000121806023  | 0.00219875816  | 0.0000000001225583401 |
| 0.00000743482 | 0.00001486964 | 0.001387093284 | 0.0000000001034183462 | 0.0000000001220797444 | 0.002206178042 | 0.0000000001229719228 |
| 0.00000745149 | 0.00001488631 | 0.001390203358 | 0.0000000001036502259 | 0.0000000001223534658 | 0.002208651335 | 0.0000000001231097837 |
| 0.00000746816 | 0.00001491965 | 0.001393313433 | 0.0000000001038821056 | 0.0000000001226271872 | 0.002213597923 | 0.0000000001233855055 |
| 0.00000748483 | 0.00001495299 | 0.001396423507 | 0.0000000001041139853 | 0.0000000001229009086 | 0.00221854451  | 0.0000000001236612273 |
| 0.0000075015  | 0.00001498633 | 0.001399533582 | 0.000000000104345865  | 0.00000000012317463   | 0.002223491098 | 0.0000000001239369491 |
| 0.00000751817 | 0.000015003   | 0.001402643657 | 0.0000000001045777447 | 0.0000000001234483514 | 0.002225964392 | 0.00000000012407481   |
| 0.00000753484 | 0.00001503634 | 0.001405753731 | 0.0000000001048096244 | 0.0000000001237220728 | 0.002230910979 | 0.0000000001243505318 |
| 0.00000755151 | 0.00001506968 | 0.001408863806 | 0.0000000001050415041 | 0.0000000001239957942 | 0.002235857567 | 0.0000000001246262536 |
| 0.00000756818 | 0.00001510302 | 0.001411973881 | 0.0000000001052733838 | 0.0000000001242695156 | 0.002240804154 | 0.0000000001249019754 |
| 0.00000758485 | 0.00001513636 | 0.001415083955 | 0.0000000001055052635 | 0.000000000124543237  | 0.002245750742 | 0.0000000001251776972 |
| 0.00000760152 | 0.0000151697  | 0.00141819403  | 0.0000000001057371432 | 0.0000000001248169584 | 0.002250697329 | 0.000000000125453419  |
| 0.00000761819 | 0.00001520304 | 0.001421304104 | 0.0000000001059690229 | 0.0000000001250906798 | 0.002255643917 | 0.0000000001257291408 |
| 0.00000763486 | 0.00001525305 | 0.001424414179 | 0.0000000001062009026 | 0.0000000001253644012 | 0.002263063798 | 0.0000000001261427235 |
| 0.00000765153 | 0.00001528639 | 0.001427524254 | 0.0000000001064327823 | 0.0000000001256381226 | 0.002268010386 | 0.0000000001264184453 |
| 0.0000076682  | 0.00001531973 | 0.001430634328 | 0.000000000106664662  | 0.000000000125911844  | 0.002272956973 | 0.0000000001266941671 |
| 0.00000768487 | 0.0000153364  | 0.001433744403 | 0.0000000001068965417 | 0.0000000001261855654 | 0.002275430267 | 0.000000000126832028  |
| 0.00000770154 | 0.00001536974 | 0.001436854478 | 0.0000000001071284214 | 0.0000000001264592868 | 0.002280376855 | 0.0000000001271077498 |
| 0.00000771821 | 0.00001540308 | 0.001439964552 | 0.0000000001073603011 | 0.0000000001267330082 | 0.002285323442 | 0.0000000001273834716 |
| 0.00000773488 | 0.00001543642 | 0.001443074627 | 0.0000000001075921808 | 0.0000000001270067296 | 0.00229027003  | 0.0000000001276591934 |
| 0.00000775155 | 0.00001545309 | 0.001446184701 | 0.0000000001078240605 | 0.000000000127280451  | 0.002292743323 | 0.0000000001277970543 |
| 0.00000776822 | 0.00001548643 | 0.001449294776 | 0.0000000001080559402 | 0.0000000001275541724 | 0.002297689911 | 0.0000000001280727761 |
| 0.00000778489 | 0.00001551977 | 0.001452404851 | 0.0000000001082878199 | 0.0000000001278278938 | 0.002302636499 | 0.0000000001283484979 |
| 0.00000780156 | 0.00001553644 | 0.001455514925 | 0.0000000001085196996 | 0.0000000001281016152 | 0.002305109792 | 0.0000000001284863588 |
| 0.00000781823 | 0.00001556978 | 0.001458625    | 0.0000000001087515793 | 0.0000000001283753366 | 0.00231005638  | 0.0000000001287620806 |
| 0.0000078349  | 0.00001561979 | 0.001461735075 | 0.000000000108983459  | 0.000000000128649058  | 0.002317476261 | 0.0000000001291756633 |
| 0.00000785157 | 0.00001565313 | 0.001464845149 | 0.0000000001092153387 | 0.0000000001289227794 | 0.002322422849 | 0.0000000001294513851 |
| 0.00000786824 | 0.00001570314 | 0.001467955224 | 0.0000000001094472184 | 0.0000000001291965008 | 0.00232984273  | 0.0000000001298649678 |
| 0.00000788491 | 0.00001575315 | 0.001471065299 | 0.0000000001096790981 | 0.0000000001294702222 | 0.002337262611 | 0.0000000001302785505 |
| 0.00000790158 | 0.00001578649 | 0.001474175373 | 0.0000000001099109778 | 0.0000000001297439436 | 0.002342209199 | 0.0000000001305542723 |
| 0.00000791825 | 0.00001580316 | 0.001477285448 | 0.0000000001101428575 | 0.000000000130017665  | 0.002344682493 | 0.0000000001306921332 |
| 0.00000793492 | 0.0000158365  | 0.001480395522 | 0.0000000001103747372 | 0.0000000001302913864 | 0.00234962908  | 0.000000000130967855  |
| 0.00000795159 | 0.00001588651 | 0.001483505597 | 0.0000000001106066169 | 0.0000000001305651078 | 0.002357048961 | 0.0000000001313814377 |
| 0.00000796826 | 0.00001591985 | 0.001486615672 | 0.0000000001108384966 | 0.0000000001308388292 | 0.002361995549 | 0.0000000001316571595 |
| 0.00000798493 | 0.00001595319 | 0.001489725746 | 0.0000000001110703763 | 0.0000000001311125506 | 0.002366942136 | 0.0000000001319328813 |
| 0.0000080016  | 0.00001596986 | 0.001492835821 | 0.000000000111302256  | 0.000000000131386272  | 0.00236941543  | 0.0000000001320707422 |

|               |               |                |                       |                       |                |                       |
|---------------|---------------|----------------|-----------------------|-----------------------|----------------|-----------------------|
| 0.00000801827 | 0.00001601987 | 0.001495945896 | 0.0000000001115341357 | 0.0000000001316599934 | 0.002376835312 | 0.0000000001324843249 |
| 0.00000803494 | 0.00001603654 | 0.00149905597  | 0.0000000001117660154 | 0.0000000001319337148 | 0.002379308605 | 0.0000000001326221858 |
| 0.00000805161 | 0.00001608655 | 0.001502166045 | 0.0000000001119978951 | 0.0000000001322074362 | 0.002386728487 | 0.0000000001330357685 |
| 0.00000806828 | 0.00001610322 | 0.001505276119 | 0.0000000001122297748 | 0.0000000001324811576 | 0.00238920178  | 0.0000000001331736294 |
| 0.00000808495 | 0.00001611989 | 0.001508386194 | 0.0000000001124616545 | 0.000000000132754879  | 0.002391675074 | 0.0000000001333114903 |
| 0.00000810162 | 0.00001615323 | 0.001511496269 | 0.0000000001126935342 | 0.0000000001330286004 | 0.002396621662 | 0.0000000001335872121 |
| 0.00000811829 | 0.00001621991 | 0.001514606343 | 0.0000000001129254139 | 0.0000000001333023218 | 0.002406514837 | 0.0000000001341386557 |
| 0.00000813496 | 0.00001626992 | 0.001517716418 | 0.0000000001131572936 | 0.0000000001335760432 | 0.002413934718 | 0.0000000001345522384 |
| 0.00000815163 | 0.00001628659 | 0.001520826493 | 0.0000000001133891733 | 0.0000000001338497646 | 0.002416408012 | 0.0000000001346900993 |
| 0.0000081683  | 0.00001631993 | 0.001523936567 | 0.000000000113621053  | 0.000000000134123486  | 0.002421354599 | 0.0000000001349658211 |
| 0.00000818497 | 0.00001635327 | 0.001527046642 | 0.0000000001138529327 | 0.0000000001343972074 | 0.002426301187 | 0.0000000001352415429 |
| 0.00000820164 | 0.00001638661 | 0.001530156716 | 0.0000000001140848124 | 0.0000000001346709288 | 0.002431247774 | 0.0000000001355172647 |
| 0.00000821831 | 0.00001640328 | 0.001533266791 | 0.0000000001143166921 | 0.0000000001349446502 | 0.002433721068 | 0.0000000001356551256 |
| 0.00000823498 | 0.00001643662 | 0.001536376866 | 0.0000000001145485718 | 0.0000000001352183716 | 0.002438667656 | 0.0000000001359308474 |
| 0.00000825165 | 0.00001646996 | 0.00153948694  | 0.0000000001147804515 | 0.000000000135492093  | 0.002443614243 | 0.0000000001362065692 |
| 0.00000826832 | 0.00001648663 | 0.001542597015 | 0.0000000001150123312 | 0.0000000001357658144 | 0.002446087537 | 0.0000000001363444301 |
| 0.00000828499 | 0.00001653664 | 0.00154570709  | 0.0000000001152442109 | 0.0000000001360395358 | 0.002453507418 | 0.0000000001367580128 |
| 0.00000830166 | 0.00001658665 | 0.001548817164 | 0.0000000001154760906 | 0.0000000001363132572 | 0.0024609273   | 0.0000000001371715955 |
| 0.00000831833 | 0.00001661999 | 0.001551927239 | 0.0000000001157079703 | 0.0000000001365869786 | 0.002465873887 | 0.0000000001374473173 |
| 0.000008335   | 0.00001665333 | 0.001555037313 | 0.00000000011593985   | 0.0000000001368607    | 0.002470820475 | 0.0000000001377230391 |
| 0.00000835167 | 0.00001668667 | 0.001558147388 | 0.0000000001161717297 | 0.0000000001371344214 | 0.002475767062 | 0.0000000001379987609 |
| 0.00000836834 | 0.00001672001 | 0.001561257463 | 0.0000000001164036094 | 0.0000000001374081428 | 0.00248071365  | 0.0000000001382744827 |
| 0.00000838501 | 0.00001675335 | 0.001564367537 | 0.0000000001166354891 | 0.0000000001376818642 | 0.002485660237 | 0.0000000001385502045 |
| 0.00000840168 | 0.00001677002 | 0.001567477612 | 0.0000000001168673688 | 0.0000000001379555856 | 0.002488133531 | 0.0000000001386880654 |
| 0.00000841835 | 0.00001680336 | 0.001570587687 | 0.0000000001170992485 | 0.000000000138229307  | 0.002493080119 | 0.0000000001389637872 |
| 0.00000843502 | 0.00001685337 | 0.001573697761 | 0.0000000001173311282 | 0.0000000001385030284 | 0.0025005      | 0.0000000001393773699 |
| 0.00000845169 | 0.00001688671 | 0.001576807836 | 0.0000000001175630079 | 0.0000000001387767498 | 0.002505446588 | 0.0000000001396530917 |
| 0.00000846836 | 0.00001692005 | 0.00157991791  | 0.0000000001177948876 | 0.0000000001390504712 | 0.002510393175 | 0.0000000001399288135 |
| 0.00000848503 | 0.00001695339 | 0.001583027985 | 0.0000000001180267673 | 0.0000000001393241926 | 0.002515339763 | 0.0000000001402045353 |
| 0.0000085017  | 0.00001698673 | 0.00158613806  | 0.000000000118258647  | 0.000000000139597914  | 0.00252028635  | 0.0000000001404802571 |
| 0.00000851837 | 0.0000170034  | 0.001589248134 | 0.0000000001184905267 | 0.0000000001398716354 | 0.002522759644 | 0.000000000140618118  |
| 0.00000853504 | 0.00001703674 | 0.001592358209 | 0.0000000001187224064 | 0.0000000001401453568 | 0.002527706231 | 0.0000000001408938398 |
| 0.00000855171 | 0.00001707008 | 0.001595468284 | 0.0000000001189542861 | 0.0000000001404190782 | 0.002532652819 | 0.0000000001411695616 |
| 0.00000856838 | 0.00001712009 | 0.001598578358 | 0.0000000001191861658 | 0.0000000001406927996 | 0.0025400727   | 0.0000000001415831443 |
| 0.00000858505 | 0.00001715343 | 0.001601688433 | 0.0000000001194180455 | 0.000000000140966521  | 0.002545019288 | 0.0000000001418588661 |
| 0.00000860172 | 0.00001718677 | 0.001604798507 | 0.0000000001196499252 | 0.0000000001412402424 | 0.002549965875 | 0.0000000001421345879 |
| 0.00000861839 | 0.00001722011 | 0.001607908582 | 0.0000000001198818049 | 0.0000000001415139638 | 0.002554912463 | 0.0000000001424103097 |
| 0.00000863506 | 0.00001725345 | 0.001611018657 | 0.0000000001201136846 | 0.0000000001417876852 | 0.00255985905  | 0.0000000001426860315 |
| 0.00000865173 | 0.00001728679 | 0.001614128731 | 0.0000000001203455643 | 0.0000000001420614066 | 0.002564805638 | 0.0000000001429617533 |
| 0.0000086684  | 0.00001730346 | 0.001617238806 | 0.000000000120577444  | 0.000000000142335128  | 0.002567278932 | 0.0000000001430996142 |

|               |               |                |                       |                       |                |                       |
|---------------|---------------|----------------|-----------------------|-----------------------|----------------|-----------------------|
| 0.00000868507 | 0.0000173368  | 0.001620348881 | 0.0000000001208093237 | 0.0000000001426088494 | 0.002572225519 | 0.000000000143375336  |
| 0.00000870174 | 0.00001737014 | 0.001623458955 | 0.0000000001210412034 | 0.0000000001428825708 | 0.002577172107 | 0.0000000001436510578 |
| 0.00000871841 | 0.00001742015 | 0.00162656903  | 0.0000000001212730831 | 0.0000000001431562922 | 0.002584591988 | 0.0000000001440646405 |
| 0.00000873508 | 0.00001745349 | 0.001629679104 | 0.0000000001215049628 | 0.0000000001434300136 | 0.002589538576 | 0.0000000001443403623 |
| 0.00000875175 | 0.00001747016 | 0.001632789179 | 0.0000000001217368425 | 0.000000000143703735  | 0.002592011869 | 0.0000000001444782232 |
| 0.00000876842 | 0.0000175035  | 0.001635899254 | 0.0000000001219687222 | 0.0000000001439774564 | 0.002596958457 | 0.000000000144753945  |
| 0.00000878509 | 0.00001753684 | 0.001639009328 | 0.0000000001222006019 | 0.0000000001442511778 | 0.002601905045 | 0.0000000001450296668 |
| 0.00000880176 | 0.00001757018 | 0.001642119403 | 0.0000000001224324816 | 0.0000000001445248992 | 0.002606851632 | 0.0000000001453053886 |
| 0.00000881843 | 0.00001762019 | 0.001645229478 | 0.0000000001226643613 | 0.0000000001447986206 | 0.002614271513 | 0.0000000001457189713 |
| 0.0000088351  | 0.00001765353 | 0.001648339552 | 0.000000000122896241  | 0.000000000145072342  | 0.002619218101 | 0.0000000001459946931 |
| 0.00000885177 | 0.00001768687 | 0.001651449627 | 0.0000000001231281207 | 0.0000000001453460634 | 0.002624164688 | 0.0000000001462704149 |
| 0.00000886844 | 0.00001772021 | 0.001654559701 | 0.0000000001233600004 | 0.0000000001456197848 | 0.002629111276 | 0.0000000001465461367 |
| 0.00000888511 | 0.00001773688 | 0.001657669776 | 0.0000000001235918801 | 0.0000000001458935062 | 0.00263158457  | 0.0000000001466839976 |
| 0.00000890178 | 0.00001777022 | 0.001660779851 | 0.0000000001238237598 | 0.0000000001461672276 | 0.002636531157 | 0.0000000001469597194 |
| 0.00000891845 | 0.00001782023 | 0.001663889925 | 0.0000000001240556395 | 0.000000000146440949  | 0.002643951039 | 0.0000000001473733021 |
| 0.00000893512 | 0.0000178369  | 0.001667       | 0.0000000001242875192 | 0.0000000001467146704 | 0.002646424332 | 0.000000000147511163  |
| 0.00000895179 | 0.00001788691 | 0.001670110075 | 0.0000000001245193989 | 0.0000000001469883918 | 0.002653844214 | 0.0000000001479247457 |
| 0.00000896846 | 0.00001790358 | 0.001673220149 | 0.0000000001247512786 | 0.0000000001472621132 | 0.002656317507 | 0.0000000001480626066 |
| 0.00000898513 | 0.00001795359 | 0.001676330224 | 0.0000000001249831583 | 0.0000000001475358346 | 0.002663737389 | 0.0000000001484761893 |
| 0.0000090018  | 0.00001797026 | 0.001679440299 | 0.000000000125215038  | 0.000000000147809556  | 0.002666210682 | 0.0000000001486140502 |
| 0.00000901847 | 0.0000180036  | 0.001682550373 | 0.0000000001254469177 | 0.0000000001480832774 | 0.00267115727  | 0.000000000148889772  |
| 0.00000903514 | 0.00001805361 | 0.001685660448 | 0.0000000001256787974 | 0.0000000001483569988 | 0.002678577151 | 0.0000000001493033547 |
| 0.00000905181 | 0.00001808695 | 0.001688770522 | 0.0000000001259106771 | 0.0000000001486307202 | 0.002683523739 | 0.0000000001495790765 |
| 0.00000906848 | 0.00001810362 | 0.001691880597 | 0.0000000001261425568 | 0.0000000001489044416 | 0.002685997033 | 0.0000000001497169374 |
| 0.00000908515 | 0.00001815363 | 0.001694990672 | 0.0000000001263744365 | 0.000000000149178163  | 0.002693416914 | 0.0000000001501305201 |
| 0.00000910182 | 0.0000181703  | 0.001698100746 | 0.0000000001266063162 | 0.0000000001494518844 | 0.002695890208 | 0.000000000150268381  |
| 0.00000911849 | 0.00001820364 | 0.001701210821 | 0.0000000001268381959 | 0.0000000001497256058 | 0.002700836795 | 0.0000000001505441028 |
| 0.00000913516 | 0.00001823698 | 0.001704320896 | 0.0000000001270700756 | 0.0000000001499993272 | 0.002705783383 | 0.0000000001508198246 |
| 0.00000915183 | 0.00001828699 | 0.00170743097  | 0.0000000001273019553 | 0.0000000001502730486 | 0.002713203264 | 0.0000000001512334073 |
| 0.0000091685  | 0.00001832033 | 0.001710541045 | 0.000000000127533835  | 0.00000000015054677   | 0.002718149852 | 0.0000000001515091291 |
| 0.00000918517 | 0.000018337   | 0.001713651119 | 0.0000000001277657147 | 0.0000000001508204914 | 0.002720623145 | 0.00000000015164699   |
| 0.00000920184 | 0.00001837034 | 0.001716761194 | 0.0000000001279975944 | 0.0000000001510942128 | 0.002725569733 | 0.0000000001519227118 |
| 0.00000921851 | 0.00001842035 | 0.001719871269 | 0.0000000001282294741 | 0.0000000001513679342 | 0.002732989614 | 0.0000000001523362945 |
| 0.00000923518 | 0.00001845369 | 0.001722981343 | 0.0000000001284613538 | 0.0000000001516416556 | 0.002737936202 | 0.0000000001526120163 |
| 0.00000925185 | 0.00001847036 | 0.001726091418 | 0.0000000001286932335 | 0.000000000151915377  | 0.002740409496 | 0.0000000001527498772 |
| 0.00000926852 | 0.0000185037  | 0.001729201493 | 0.0000000001289251132 | 0.0000000001521890984 | 0.002745356083 | 0.000000000153025599  |
| 0.00000928519 | 0.00001853704 | 0.001732311567 | 0.0000000001291569929 | 0.0000000001524628198 | 0.002750302671 | 0.0000000001533013208 |
| 0.00000930186 | 0.00001857038 | 0.001735421642 | 0.0000000001293888726 | 0.0000000001527365412 | 0.002755249258 | 0.0000000001535770426 |
| 0.00000931853 | 0.00001862039 | 0.001738531716 | 0.0000000001296207523 | 0.0000000001530102626 | 0.002762669139 | 0.0000000001539906253 |
| 0.0000093352  | 0.00001865373 | 0.001741641791 | 0.000000000129852632  | 0.000000000153283984  | 0.002767615727 | 0.0000000001542663471 |

|               |               |                |                       |                       |                |                       |
|---------------|---------------|----------------|-----------------------|-----------------------|----------------|-----------------------|
| 0.00000935187 | 0.0000186704  | 0.001744751866 | 0.0000000001300845117 | 0.0000000001535577054 | 0.002770089021 | 0.000000000154404208  |
| 0.00000936854 | 0.00001872041 | 0.00174786194  | 0.0000000001303163914 | 0.0000000001538314268 | 0.002777508902 | 0.0000000001548177907 |
| 0.00000938521 | 0.00001875375 | 0.001750972015 | 0.0000000001305482711 | 0.0000000001541051482 | 0.00278245549  | 0.0000000001550935125 |
| 0.00000940188 | 0.00001878709 | 0.00175408209  | 0.0000000001307801508 | 0.0000000001543788696 | 0.002787402077 | 0.0000000001553692343 |
| 0.00000941855 | 0.00001882043 | 0.001757192164 | 0.0000000001310120305 | 0.000000000154652591  | 0.002792348665 | 0.0000000001556449561 |
| 0.00000943522 | 0.00001885377 | 0.001760302239 | 0.0000000001312439102 | 0.0000000001549263124 | 0.002797295252 | 0.0000000001559206779 |
| 0.00000945189 | 0.00001888711 | 0.001763412313 | 0.0000000001314757899 | 0.0000000001552000338 | 0.00280224184  | 0.0000000001561963997 |
| 0.00000946856 | 0.00001892045 | 0.001766522388 | 0.0000000001317076696 | 0.0000000001554737552 | 0.002807188427 | 0.0000000001564721215 |
| 0.00000948523 | 0.00001893712 | 0.001769632463 | 0.0000000001319395493 | 0.0000000001557474766 | 0.002809661721 | 0.0000000001566099824 |
| 0.0000095019  | 0.00001897046 | 0.001772742537 | 0.000000000132171429  | 0.000000000156021198  | 0.002814608309 | 0.0000000001568857042 |
| 0.00000951857 | 0.0000190038  | 0.001775852612 | 0.0000000001324033087 | 0.0000000001562949194 | 0.002819554896 | 0.000000000157161426  |
| 0.00000953524 | 0.00001902047 | 0.001778962687 | 0.0000000001326351884 | 0.0000000001565686408 | 0.00282202819  | 0.0000000001572992869 |
| 0.00000955191 | 0.00001907048 | 0.001782072761 | 0.0000000001328670681 | 0.0000000001568423622 | 0.002829448071 | 0.0000000001577128696 |
| 0.00000956858 | 0.00001908715 | 0.001785182836 | 0.0000000001330989478 | 0.0000000001571160836 | 0.002831921365 | 0.0000000001578507305 |
| 0.00000958525 | 0.00001913716 | 0.00178829291  | 0.0000000001333308275 | 0.000000000157389805  | 0.002839341246 | 0.0000000001582643132 |
| 0.00000960192 | 0.0000191705  | 0.001791402985 | 0.0000000001335627072 | 0.0000000001576635264 | 0.002844287834 | 0.000000000158540035  |
| 0.00000961859 | 0.00001920384 | 0.00179451306  | 0.0000000001337945869 | 0.0000000001579372478 | 0.002849234421 | 0.0000000001588157568 |
| 0.00000963526 | 0.00001925385 | 0.001797623134 | 0.0000000001340264666 | 0.0000000001582109692 | 0.002856654303 | 0.0000000001592293395 |
| 0.00000965193 | 0.00001927052 | 0.001800733209 | 0.0000000001342583463 | 0.0000000001584846906 | 0.002859127596 | 0.0000000001593672004 |
| 0.0000096686  | 0.00001932053 | 0.001803843284 | 0.000000000134490226  | 0.000000000158758412  | 0.002866547478 | 0.0000000001597807831 |
| 0.00000968527 | 0.0000193372  | 0.001806953358 | 0.0000000001347221057 | 0.0000000001590321334 | 0.002869020772 | 0.000000000159918644  |
| 0.00000970194 | 0.00001938721 | 0.001810063433 | 0.0000000001349539854 | 0.0000000001593058548 | 0.002876440653 | 0.0000000001603322267 |
| 0.00000971861 | 0.00001942055 | 0.001813173507 | 0.0000000001351858651 | 0.0000000001595795762 | 0.00288138724  | 0.0000000001606079485 |
| 0.00000973528 | 0.00001943722 | 0.001816283582 | 0.0000000001354177448 | 0.0000000001598532976 | 0.002883860534 | 0.0000000001607458094 |
| 0.00000975195 | 0.00001948723 | 0.001819393657 | 0.0000000001356496245 | 0.000000000160127019  | 0.002891280415 | 0.0000000001611593921 |
| 0.00000976862 | 0.0000195039  | 0.001822503731 | 0.0000000001358815042 | 0.0000000001604007404 | 0.002893753709 | 0.000000000161297253  |
| 0.00000978529 | 0.00001953724 | 0.001825613806 | 0.0000000001361133839 | 0.0000000001606744618 | 0.002898700297 | 0.0000000001615729748 |
| 0.00000980196 | 0.00001958725 | 0.001828723881 | 0.0000000001363452636 | 0.0000000001609481832 | 0.002906120178 | 0.0000000001619865575 |
| 0.00000981863 | 0.00001960392 | 0.001831833955 | 0.0000000001365771433 | 0.0000000001612219046 | 0.002908593472 | 0.0000000001621244184 |
| 0.0000098353  | 0.00001965393 | 0.00183494403  | 0.000000000136809023  | 0.000000000161495626  | 0.002916013353 | 0.0000000001625380011 |
| 0.00000985197 | 0.0000196706  | 0.001838054104 | 0.0000000001370409027 | 0.0000000001617693474 | 0.002918486647 | 0.000000000162675862  |
| 0.00000986864 | 0.00001970394 | 0.001841164179 | 0.0000000001372727824 | 0.0000000001620430688 | 0.002923433234 | 0.0000000001629515838 |
| 0.00000988531 | 0.00001975395 | 0.001844274254 | 0.0000000001375046621 | 0.0000000001623167902 | 0.002930853116 | 0.0000000001633651665 |
| 0.00000990198 | 0.00001977062 | 0.001847384328 | 0.0000000001377365418 | 0.0000000001625905116 | 0.002933326409 | 0.0000000001635030274 |
| 0.00000991865 | 0.00001978729 | 0.001850494403 | 0.0000000001379684215 | 0.000000000162864233  | 0.002935799703 | 0.0000000001636408883 |
| 0.00000993532 | 0.00001982063 | 0.001853604478 | 0.0000000001382003012 | 0.0000000001631379544 | 0.002940746291 | 0.0000000001639166101 |
| 0.00000995199 | 0.00001987064 | 0.001856714552 | 0.0000000001384321809 | 0.0000000001634116758 | 0.002948166172 | 0.0000000001643301928 |
| 0.00000996866 | 0.00001992065 | 0.001859824627 | 0.0000000001386640606 | 0.0000000001636853972 | 0.002955586053 | 0.0000000001647437755 |
| 0.00000998533 | 0.00001995399 | 0.001862934701 | 0.0000000001388959403 | 0.0000000001639591186 | 0.002960532641 | 0.0000000001650194973 |
| 0.000010002   | 0.00001998733 | 0.001866044776 | 0.00000000013912782   | 0.00000000016423284   | 0.002965479228 | 0.0000000001652952191 |

|               |               |                |                       |                       |                |                       |
|---------------|---------------|----------------|-----------------------|-----------------------|----------------|-----------------------|
| 0.00001001867 | 0.00002002067 | 0.001869154851 | 0.0000000001393596997 | 0.0000000001645065614 | 0.002970425816 | 0.0000000001655709409 |
| 0.00001003534 | 0.00002005401 | 0.001872264925 | 0.0000000001395915794 | 0.0000000001647802828 | 0.002975372404 | 0.0000000001658466627 |
| 0.00001005201 | 0.00002007068 | 0.001875375    | 0.0000000001398234591 | 0.0000000001650540042 | 0.002977845697 | 0.0000000001659845236 |
| 0.00001006868 | 0.00002010402 | 0.001878485075 | 0.0000000001400553388 | 0.0000000001653277256 | 0.002982792285 | 0.0000000001662602454 |
| 0.00001008535 | 0.00002015403 | 0.001881595149 | 0.0000000001402872185 | 0.000000000165601447  | 0.002990212166 | 0.0000000001666738281 |
| 0.00001010202 | 0.0000201707  | 0.001884705224 | 0.0000000001405190982 | 0.0000000001658751684 | 0.00299268546  | 0.000000000166811689  |
| 0.00001011869 | 0.00002020404 | 0.001887815299 | 0.0000000001407509779 | 0.0000000001661488898 | 0.002997632047 | 0.0000000001670874108 |
| 0.00001013536 | 0.00002023738 | 0.001890925373 | 0.0000000001409828576 | 0.0000000001664226112 | 0.003002578635 | 0.0000000001673631326 |
| 0.00001015203 | 0.00002028739 | 0.001894035448 | 0.0000000001412147373 | 0.0000000001666963326 | 0.003009998516 | 0.0000000001677767153 |
| 0.0000101687  | 0.00002030406 | 0.001897145522 | 0.000000000141446617  | 0.000000000166970054  | 0.00301247181  | 0.0000000001679145762 |
| 0.00001018537 | 0.0000203374  | 0.001900255597 | 0.0000000001416784967 | 0.0000000001672437754 | 0.003017418398 | 0.000000000168190298  |
| 0.00001020204 | 0.00002038741 | 0.001903365672 | 0.0000000001419103764 | 0.0000000001675174968 | 0.003024838279 | 0.0000000001686038807 |
| 0.00001021871 | 0.00002040408 | 0.001906475746 | 0.0000000001421422561 | 0.0000000001677912182 | 0.003027311573 | 0.0000000001687417416 |
| 0.00001023538 | 0.00002043742 | 0.001909585821 | 0.0000000001423741358 | 0.0000000001680649396 | 0.00303225816  | 0.0000000001690174634 |
| 0.00001025205 | 0.00002048743 | 0.001912695896 | 0.0000000001426060155 | 0.000000000168338661  | 0.003039678042 | 0.0000000001694310461 |
| 0.00001026872 | 0.0000205041  | 0.00191580597  | 0.0000000001428378952 | 0.0000000001686123824 | 0.003042151335 | 0.000000000169568907  |
| 0.00001028539 | 0.00002053744 | 0.001918916045 | 0.0000000001430697749 | 0.0000000001688861038 | 0.003047097923 | 0.0000000001698446288 |
| 0.00001030206 | 0.00002058745 | 0.001922026119 | 0.0000000001433016546 | 0.0000000001691598252 | 0.003054517804 | 0.0000000001702582115 |
| 0.00001031873 | 0.00002062079 | 0.001925136194 | 0.0000000001435335343 | 0.0000000001694335466 | 0.003059464392 | 0.0000000001705339333 |
| 0.0000103354  | 0.00002065413 | 0.001928246269 | 0.000000000143765414  | 0.000000000169707268  | 0.003064410979 | 0.0000000001708096551 |
| 0.00001035207 | 0.00002068747 | 0.001931356343 | 0.0000000001439972937 | 0.0000000001699809894 | 0.003069357567 | 0.0000000001710853769 |
| 0.00001036874 | 0.00002070414 | 0.001934466418 | 0.0000000001442291734 | 0.0000000001702547108 | 0.003071830861 | 0.0000000001712232378 |
| 0.00001038541 | 0.00002073748 | 0.001937576493 | 0.0000000001444610531 | 0.0000000001705284322 | 0.003076777448 | 0.0000000001714989596 |
| 0.00001040208 | 0.00002078749 | 0.001940686567 | 0.0000000001446929328 | 0.0000000001708021536 | 0.003084197329 | 0.0000000001719125423 |
| 0.00001041875 | 0.00002080416 | 0.001943796642 | 0.0000000001449248125 | 0.000000000171075875  | 0.003086670623 | 0.0000000001720504032 |
| 0.00001043542 | 0.00002085417 | 0.001946906716 | 0.0000000001451566922 | 0.0000000001713495964 | 0.003094090504 | 0.0000000001724639859 |
| 0.00001045209 | 0.00002088751 | 0.001950016791 | 0.0000000001453885719 | 0.0000000001716233178 | 0.003099037092 | 0.0000000001727397077 |
| 0.00001046876 | 0.00002090418 | 0.001953126866 | 0.0000000001456204516 | 0.0000000001718970392 | 0.003101510386 | 0.0000000001728775686 |
| 0.00001048543 | 0.00002093752 | 0.00195623694  | 0.0000000001458523313 | 0.0000000001721707606 | 0.003106456973 | 0.0000000001731532904 |
| 0.0000105021  | 0.00002098753 | 0.001959347015 | 0.000000000146084211  | 0.000000000172444482  | 0.003113876855 | 0.0000000001735668731 |
| 0.00001051877 | 0.00002102087 | 0.00196245709  | 0.0000000001463160907 | 0.0000000001727182034 | 0.003118823442 | 0.0000000001738425949 |
| 0.00001053544 | 0.00002103754 | 0.001965567164 | 0.0000000001465479704 | 0.0000000001729919248 | 0.003121296736 | 0.0000000001739804558 |
| 0.00001055211 | 0.00002108755 | 0.001968677239 | 0.0000000001467798501 | 0.0000000001732656462 | 0.003128716617 | 0.0000000001743940385 |
| 0.00001056878 | 0.00002110422 | 0.001971787313 | 0.0000000001470117298 | 0.0000000001735393676 | 0.003131189911 | 0.0000000001745318994 |
| 0.00001058545 | 0.00002115423 | 0.001974897388 | 0.0000000001472436095 | 0.000000000173813089  | 0.003138609792 | 0.0000000001749454821 |
| 0.00001060212 | 0.0000211709  | 0.001978007463 | 0.0000000001474754892 | 0.0000000001740868104 | 0.003141083086 | 0.000000000175083343  |
| 0.00001061879 | 0.00002122091 | 0.001981117537 | 0.0000000001477073689 | 0.0000000001743605318 | 0.003148502967 | 0.0000000001754969257 |
| 0.00001063546 | 0.00002123758 | 0.001984227612 | 0.0000000001479392486 | 0.0000000001746342532 | 0.003150976261 | 0.0000000001756347866 |
| 0.00001065213 | 0.00002128759 | 0.001987337687 | 0.0000000001481711283 | 0.0000000001749079746 | 0.003158396142 | 0.0000000001760483693 |
| 0.0000106688  | 0.00002132093 | 0.001990447761 | 0.000000000148403008  | 0.000000000175181696  | 0.00316334273  | 0.0000000001763240911 |



|               |               |                |                       |                       |                |                       |
|---------------|---------------|----------------|-----------------------|-----------------------|----------------|-----------------------|
| 0.00001068547 | 0.00002135427 | 0.001993557836 | 0.0000000001486348877 | 0.0000000001754554174 | 0.003168289318 | 0.0000000001765998129 |
| 0.00001070214 | 0.00002138761 | 0.00199666791  | 0.0000000001488667674 | 0.0000000001757291388 | 0.003173235905 | 0.0000000001768755347 |
| 0.00001071881 | 0.00002140428 | 0.001999777985 | 0.0000000001490986471 | 0.0000000001760028602 | 0.003175709199 | 0.0000000001770133956 |
| 0.00001073548 | 0.00002145429 | 0.00200288806  | 0.0000000001493305268 | 0.0000000001762765816 | 0.00318312908  | 0.0000000001774269783 |
| 0.00001075215 | 0.00002147096 | 0.002005998134 | 0.0000000001495624065 | 0.000000000176550303  | 0.003185602374 | 0.0000000001775648392 |
| 0.00001076882 | 0.00002152097 | 0.002009108209 | 0.0000000001497942862 | 0.0000000001768240244 | 0.003193022255 | 0.0000000001779784219 |
| 0.00001078549 | 0.00002153764 | 0.002012218284 | 0.0000000001500261659 | 0.0000000001770977458 | 0.003195495549 | 0.0000000001781162828 |
| 0.00001080216 | 0.00002157098 | 0.002015328358 | 0.0000000001502580456 | 0.0000000001773714672 | 0.003200442136 | 0.0000000001783920046 |
| 0.00001081883 | 0.00002162099 | 0.002018438433 | 0.0000000001504899253 | 0.0000000001776451886 | 0.003207862018 | 0.0000000001788055873 |
| 0.0000108355  | 0.00002163766 | 0.002021548507 | 0.000000000150721805  | 0.00000000017791891   | 0.003210335312 | 0.0000000001789434482 |
| 0.00001085217 | 0.00002168767 | 0.002024658582 | 0.0000000001509536847 | 0.0000000001781926314 | 0.003217755193 | 0.0000000001793570309 |
| 0.00001086884 | 0.00002170434 | 0.002027768657 | 0.0000000001511855644 | 0.0000000001784663528 | 0.003220228487 | 0.0000000001794948918 |
| 0.00001088551 | 0.00002172101 | 0.002030878731 | 0.0000000001514174441 | 0.0000000001787400742 | 0.00322270178  | 0.0000000001796327527 |
| 0.00001090218 | 0.00002175435 | 0.002033988806 | 0.0000000001516493238 | 0.0000000001790137956 | 0.003227648368 | 0.0000000001799084745 |
| 0.00001091885 | 0.00002180436 | 0.002037098881 | 0.0000000001518812035 | 0.000000000179287517  | 0.003235068249 | 0.0000000001803220572 |
| 0.00001093552 | 0.0000218377  | 0.002040208955 | 0.0000000001521130832 | 0.0000000001795612384 | 0.003240014837 | 0.000000000180597779  |
| 0.00001095219 | 0.00002187104 | 0.00204331903  | 0.0000000001523449629 | 0.0000000001798349598 | 0.003244961424 | 0.0000000001808735008 |
| 0.00001096886 | 0.00002190438 | 0.002046429104 | 0.0000000001525768426 | 0.0000000001801086812 | 0.003249908012 | 0.0000000001811492226 |
| 0.00001098553 | 0.00002195439 | 0.002049539179 | 0.0000000001528087223 | 0.0000000001803824026 | 0.003257327893 | 0.0000000001815628053 |
| 0.0000110022  | 0.00002197106 | 0.002052649254 | 0.000000000153040602  | 0.000000000180656124  | 0.003259801187 | 0.0000000001817006662 |
| 0.00001101887 | 0.00002202107 | 0.002055759328 | 0.0000000001532724817 | 0.0000000001809298454 | 0.003267221068 | 0.0000000001821142489 |
| 0.00001103554 | 0.00002205441 | 0.002058869403 | 0.0000000001535043614 | 0.0000000001812035668 | 0.003272167656 | 0.0000000001823899707 |
| 0.00001105221 | 0.00002208775 | 0.002061979478 | 0.0000000001537362411 | 0.0000000001814772882 | 0.003277114243 | 0.0000000001826656925 |
| 0.00001106888 | 0.00002210442 | 0.002065089552 | 0.0000000001539681208 | 0.0000000001817510096 | 0.003279587537 | 0.0000000001828035534 |
| 0.00001108555 | 0.00002213776 | 0.002068199627 | 0.0000000001542000005 | 0.000000000182024731  | 0.003284534125 | 0.0000000001830792752 |
| 0.00001110222 | 0.00002215443 | 0.002071309701 | 0.0000000001544318802 | 0.0000000001822984524 | 0.003287007418 | 0.0000000001832171361 |
| 0.00001111889 | 0.00002220444 | 0.002074419776 | 0.0000000001546637599 | 0.0000000001825721738 | 0.0032944273   | 0.0000000001836307188 |
| 0.00001113556 | 0.00002222111 | 0.002077529851 | 0.0000000001548956396 | 0.0000000001828458952 | 0.003296900593 | 0.0000000001837685797 |
| 0.00001115223 | 0.00002227112 | 0.002080639925 | 0.0000000001551275193 | 0.0000000001831196166 | 0.003304320475 | 0.0000000001841821624 |
| 0.0000111689  | 0.00002228779 | 0.00208375     | 0.000000000155359399  | 0.000000000183393338  | 0.003306793769 | 0.0000000001843200233 |
| 0.00001118557 | 0.00002230446 | 0.002086860075 | 0.0000000001555912787 | 0.0000000001836670594 | 0.003309267062 | 0.0000000001844578842 |
| 0.00001120224 | 0.0000223378  | 0.002089970149 | 0.0000000001558231584 | 0.0000000001839407808 | 0.00331421365  | 0.000000000184733606  |
| 0.00001121891 | 0.00002235447 | 0.002093080224 | 0.0000000001560550381 | 0.0000000001842145022 | 0.003316686944 | 0.0000000001848714669 |
| 0.00001123558 | 0.00002240448 | 0.002096190299 | 0.0000000001562869178 | 0.0000000001844882236 | 0.003324106825 | 0.0000000001852850496 |
| 0.00001125225 | 0.00002245449 | 0.002099300373 | 0.0000000001565187975 | 0.000000000184761945  | 0.003331526706 | 0.0000000001856986323 |
| 0.00001126892 | 0.00002248783 | 0.002102410448 | 0.0000000001567506772 | 0.0000000001850356664 | 0.003336473294 | 0.0000000001859743541 |
| 0.00001128559 | 0.0000225045  | 0.002105520522 | 0.0000000001569825569 | 0.0000000001853093878 | 0.003338946588 | 0.000000000186112215  |
| 0.00001130226 | 0.00002257118 | 0.002108630597 | 0.0000000001572144366 | 0.0000000001855831092 | 0.003348839763 | 0.0000000001866636586 |
| 0.00001131893 | 0.00002258785 | 0.002111740672 | 0.0000000001574463163 | 0.0000000001858568306 | 0.003351313056 | 0.0000000001868015195 |
| 0.0000113356  | 0.00002263786 | 0.002114850746 | 0.000000000157678196  | 0.000000000186130552  | 0.003358732938 | 0.0000000001872151022 |

|               |               |                |                       |                       |                |                       |
|---------------|---------------|----------------|-----------------------|-----------------------|----------------|-----------------------|
| 0.00001135227 | 0.00002268787 | 0.002117960821 | 0.0000000001579100757 | 0.0000000001864042734 | 0.003366152819 | 0.0000000001876286849 |
| 0.00001136894 | 0.00002272121 | 0.002121070896 | 0.0000000001581419554 | 0.0000000001866779948 | 0.003371099407 | 0.0000000001879044067 |
| 0.00001138561 | 0.00002275455 | 0.00212418097  | 0.0000000001583738351 | 0.0000000001869517162 | 0.003376045994 | 0.0000000001881801285 |
| 0.00001140228 | 0.00002277122 | 0.002127291045 | 0.0000000001586057148 | 0.0000000001872254376 | 0.003378519288 | 0.0000000001883179894 |
| 0.00001141895 | 0.00002282123 | 0.002130401119 | 0.0000000001588375945 | 0.000000000187499159  | 0.003385939169 | 0.0000000001887315721 |
| 0.00001143562 | 0.0000228379  | 0.002133511194 | 0.0000000001590694742 | 0.0000000001877728804 | 0.003388412463 | 0.000000000188869433  |
| 0.00001145229 | 0.00002285457 | 0.002136621269 | 0.0000000001593013539 | 0.0000000001880466018 | 0.003390885757 | 0.0000000001890072939 |
| 0.00001146896 | 0.00002288791 | 0.002139731343 | 0.0000000001595332336 | 0.0000000001883203232 | 0.003395832344 | 0.0000000001892830157 |
| 0.00001148563 | 0.00002292125 | 0.002142841418 | 0.0000000001597651133 | 0.0000000001885940446 | 0.003400778932 | 0.0000000001895587375 |
| 0.0000115023  | 0.00002297126 | 0.002145951493 | 0.000000000159996993  | 0.000000000188867766  | 0.003408198813 | 0.0000000001899723202 |
| 0.00001151897 | 0.00002298793 | 0.002149061567 | 0.0000000001602288727 | 0.0000000001891414874 | 0.003410672107 | 0.0000000001901101811 |
| 0.00001153564 | 0.00002302127 | 0.002152171642 | 0.0000000001604607524 | 0.0000000001894152088 | 0.003415618694 | 0.0000000001903859029 |
| 0.00001155231 | 0.00002305461 | 0.002155281716 | 0.0000000001606926321 | 0.0000000001896889302 | 0.003420565282 | 0.0000000001906616247 |
| 0.00001156898 | 0.00002310462 | 0.002158391791 | 0.0000000001609245118 | 0.0000000001899626516 | 0.003427985163 | 0.0000000001910752074 |
| 0.00001158565 | 0.00002313796 | 0.002161501866 | 0.0000000001611563915 | 0.000000000190236373  | 0.003432931751 | 0.0000000001913509292 |
| 0.00001160232 | 0.00002315463 | 0.00216461194  | 0.0000000001613882712 | 0.0000000001905100944 | 0.003435405045 | 0.0000000001914887901 |
| 0.00001161899 | 0.00002320464 | 0.002167722015 | 0.0000000001616201509 | 0.0000000001907838158 | 0.003442824926 | 0.0000000001919023728 |
| 0.00001163566 | 0.00002325465 | 0.00217083209  | 0.0000000001618520306 | 0.0000000001910575372 | 0.003450244807 | 0.0000000001923159555 |
| 0.00001165233 | 0.00002328799 | 0.002173942164 | 0.0000000001620839103 | 0.0000000001913312586 | 0.003455191395 | 0.0000000001925916773 |
| 0.000011669   | 0.00002332133 | 0.002177052239 | 0.00000000016231579   | 0.00000000019160498   | 0.003460137982 | 0.0000000001928673991 |
| 0.00001168567 | 0.000023338   | 0.002180162313 | 0.0000000001625476697 | 0.0000000001918787014 | 0.003462611276 | 0.00000000019300526   |
| 0.00001170234 | 0.00002335467 | 0.002183272388 | 0.0000000001627795494 | 0.0000000001921524228 | 0.00346508457  | 0.0000000001931431209 |
| 0.00001171901 | 0.00002338801 | 0.002186382463 | 0.0000000001630114291 | 0.0000000001924261442 | 0.003470031157 | 0.0000000001934188427 |
| 0.00001173568 | 0.00002342135 | 0.002189492537 | 0.0000000001632433088 | 0.0000000001926998656 | 0.003474977745 | 0.0000000001936945645 |
| 0.00001175235 | 0.00002343802 | 0.002192602612 | 0.0000000001634751885 | 0.000000000192973587  | 0.003477451039 | 0.0000000001938324254 |
| 0.00001176902 | 0.00002347136 | 0.002195712687 | 0.0000000001637070682 | 0.0000000001932473084 | 0.003482397626 | 0.0000000001941081472 |
| 0.00001178569 | 0.0000235047  | 0.002198822761 | 0.0000000001639389479 | 0.0000000001935210298 | 0.003487344214 | 0.000000000194383869  |
| 0.00001180236 | 0.00002353804 | 0.002201932836 | 0.0000000001641708276 | 0.0000000001937947512 | 0.003492290801 | 0.0000000001946595908 |
| 0.00001181903 | 0.00002357138 | 0.00220504291  | 0.0000000001644027073 | 0.0000000001940684726 | 0.003497237389 | 0.0000000001949353126 |
| 0.0000118357  | 0.00002362139 | 0.002208152985 | 0.000000000164634587  | 0.000000000194342194  | 0.00350465727  | 0.0000000001953488953 |
| 0.00001185237 | 0.00002365473 | 0.00221126306  | 0.0000000001648664667 | 0.0000000001946159154 | 0.003509603858 | 0.0000000001956246171 |
| 0.00001186904 | 0.00002368807 | 0.002214373134 | 0.0000000001650983464 | 0.0000000001948896368 | 0.003514550445 | 0.0000000001959003389 |
| 0.00001188571 | 0.00002372141 | 0.002217483209 | 0.0000000001653302261 | 0.0000000001951633582 | 0.003519497033 | 0.0000000001961760607 |
| 0.00001190238 | 0.00002375475 | 0.002220593284 | 0.0000000001655621058 | 0.0000000001954370796 | 0.00352444362  | 0.0000000001964517825 |
| 0.00001191905 | 0.00002378809 | 0.002223703358 | 0.0000000001657939855 | 0.000000000195710801  | 0.003529390208 | 0.0000000001967275043 |
| 0.00001193572 | 0.00002380476 | 0.002226813433 | 0.0000000001660258652 | 0.0000000001959845224 | 0.003531863501 | 0.0000000001968653652 |
| 0.00001195239 | 0.0000238381  | 0.002229923507 | 0.0000000001662577449 | 0.0000000001962582438 | 0.003536810089 | 0.000000000197141087  |
| 0.00001196906 | 0.00002387144 | 0.002233033582 | 0.0000000001664896246 | 0.0000000001965319652 | 0.003541756677 | 0.0000000001974168088 |
| 0.00001198573 | 0.00002390478 | 0.002236143657 | 0.0000000001667215043 | 0.0000000001968056866 | 0.003546703264 | 0.0000000001976925306 |
| 0.0000120024  | 0.00002395479 | 0.002239253731 | 0.000000000166953384  | 0.000000000197079408  | 0.003554123145 | 0.0000000001981061133 |

|               |               |                |                       |                       |                |                       |
|---------------|---------------|----------------|-----------------------|-----------------------|----------------|-----------------------|
| 0.00001201907 | 0.00002397146 | 0.002242363806 | 0.0000000001671852637 | 0.0000000001973531294 | 0.003556596439 | 0.0000000001982439742 |
| 0.00001203574 | 0.0000240048  | 0.002245473881 | 0.0000000001674171434 | 0.0000000001976268508 | 0.003561543027 | 0.000000000198519696  |
| 0.00001205241 | 0.00002405481 | 0.002248583955 | 0.0000000001676490231 | 0.0000000001979005722 | 0.003568962908 | 0.0000000001989332787 |
| 0.00001206908 | 0.00002408815 | 0.00225169403  | 0.0000000001678809028 | 0.0000000001981742936 | 0.003573909496 | 0.0000000001992090005 |
| 0.00001208575 | 0.00002413816 | 0.002254804104 | 0.0000000001681127825 | 0.000000000198448015  | 0.003581329377 | 0.0000000001996225832 |
| 0.00001210242 | 0.00002415483 | 0.002257914179 | 0.0000000001683446622 | 0.0000000001987217364 | 0.003583802671 | 0.0000000001997604441 |
| 0.00001211909 | 0.0000241715  | 0.002261024254 | 0.0000000001685765419 | 0.0000000001989954578 | 0.003586275964 | 0.000000000199898305  |
| 0.00001213576 | 0.00002420484 | 0.002264134328 | 0.0000000001688084216 | 0.0000000001992691792 | 0.003591222552 | 0.0000000002001740268 |
| 0.00001215243 | 0.00002423818 | 0.002267244403 | 0.0000000001690403013 | 0.0000000001995429006 | 0.003596169139 | 0.0000000002004497486 |
| 0.0000121691  | 0.00002427152 | 0.002270354478 | 0.000000000169272181  | 0.000000000199816622  | 0.003601115727 | 0.0000000002007254704 |
| 0.00001218577 | 0.00002430486 | 0.002273464552 | 0.0000000001695040607 | 0.0000000002000903434 | 0.003606062315 | 0.0000000002010011922 |
| 0.00001220244 | 0.00002435487 | 0.002276574627 | 0.0000000001697359404 | 0.0000000002003640648 | 0.003613482196 | 0.0000000002014147749 |
| 0.00001221911 | 0.00002438821 | 0.002279684701 | 0.0000000001699678201 | 0.0000000002006377862 | 0.003618428783 | 0.0000000002016904967 |
| 0.00001223578 | 0.00002443822 | 0.002282794776 | 0.0000000001701996998 | 0.0000000002009115076 | 0.003625848665 | 0.0000000002021040794 |
| 0.00001225245 | 0.00002445489 | 0.002285904851 | 0.0000000001704315795 | 0.000000000201185229  | 0.003628321958 | 0.0000000002022419403 |
| 0.00001226912 | 0.00002448823 | 0.002289014925 | 0.0000000001706634592 | 0.0000000002014589504 | 0.003633268546 | 0.0000000002025176621 |
| 0.00001228579 | 0.0000245049  | 0.002292125    | 0.0000000001708953389 | 0.0000000002017326718 | 0.00363574184  | 0.000000000202655523  |
| 0.00001230246 | 0.00002455491 | 0.002295235075 | 0.0000000001711272186 | 0.0000000002020063932 | 0.003643161721 | 0.0000000002030691057 |
| 0.00001231913 | 0.00002458825 | 0.002298345149 | 0.0000000001713590983 | 0.0000000002022801146 | 0.003648108309 | 0.0000000002033448275 |
| 0.0000123358  | 0.00002463826 | 0.002301455224 | 0.000000000171590978  | 0.000000000202553836  | 0.00365552819  | 0.0000000002037584102 |
| 0.00001235247 | 0.0000246716  | 0.002304565299 | 0.0000000001718228577 | 0.0000000002028275574 | 0.003660474777 | 0.000000000204034132  |
| 0.00001236914 | 0.00002470494 | 0.002307675373 | 0.0000000001720547374 | 0.0000000002031012788 | 0.003665421365 | 0.0000000002043098538 |
| 0.00001238581 | 0.00002472161 | 0.002310785448 | 0.0000000001722866171 | 0.0000000002033750002 | 0.003667894659 | 0.0000000002044477147 |
| 0.00001240248 | 0.00002475495 | 0.002313895522 | 0.0000000001725184968 | 0.0000000002036487216 | 0.003672841246 | 0.0000000002047234365 |
| 0.00001241915 | 0.00002480496 | 0.002317005597 | 0.0000000001727503765 | 0.000000000203922443  | 0.003680261128 | 0.0000000002051370192 |
| 0.00001243582 | 0.0000248383  | 0.002320115672 | 0.0000000001729822562 | 0.0000000002041961644 | 0.003685207715 | 0.000000000205412741  |
| 0.00001245249 | 0.00002487164 | 0.002323225746 | 0.0000000001732141359 | 0.0000000002044698858 | 0.003690154303 | 0.0000000002056884628 |
| 0.00001246916 | 0.00002488831 | 0.002326335821 | 0.0000000001734460156 | 0.0000000002047436072 | 0.003692627596 | 0.0000000002058263237 |
| 0.00001248583 | 0.00002492165 | 0.002329445896 | 0.0000000001736778953 | 0.0000000002050173286 | 0.003697574184 | 0.0000000002061020455 |
| 0.0000125025  | 0.00002498833 | 0.00233255597  | 0.000000000173909775  | 0.00000000020529105   | 0.003707467359 | 0.0000000002066534891 |
| 0.00001251917 | 0.000025005   | 0.002335666045 | 0.0000000001741416547 | 0.0000000002055647714 | 0.003709940653 | 0.00000000020679135   |
| 0.00001253584 | 0.00002502167 | 0.002338776119 | 0.0000000001743735344 | 0.0000000002058384928 | 0.003712413947 | 0.0000000002069292109 |
| 0.00001255251 | 0.00002507168 | 0.002341886194 | 0.0000000001746054141 | 0.0000000002061122142 | 0.003719833828 | 0.0000000002073427936 |
| 0.00001256918 | 0.00002512169 | 0.002344996269 | 0.0000000001748372938 | 0.0000000002063859356 | 0.003727253709 | 0.0000000002077563763 |
| 0.00001258585 | 0.00002513836 | 0.002348106343 | 0.0000000001750691735 | 0.000000000206659657  | 0.003729727003 | 0.0000000002078942372 |
| 0.00001260252 | 0.0000251717  | 0.002351216418 | 0.0000000001753010532 | 0.0000000002069333784 | 0.003734673591 | 0.000000000208169959  |
| 0.00001261919 | 0.00002520504 | 0.002354326493 | 0.0000000001755329329 | 0.0000000002072070998 | 0.003739620178 | 0.0000000002084456808 |
| 0.00001263586 | 0.00002523838 | 0.002357436567 | 0.0000000001757648126 | 0.0000000002074808212 | 0.003744566766 | 0.0000000002087214026 |
| 0.00001265253 | 0.00002528839 | 0.002360546642 | 0.0000000001759966923 | 0.0000000002077545426 | 0.003751986647 | 0.0000000002091349853 |
| 0.0000126692  | 0.00002532173 | 0.002363656716 | 0.000000000176228572  | 0.000000000208028264  | 0.003756933234 | 0.0000000002094107071 |

|               |               |                |                       |                       |                |                       |
|---------------|---------------|----------------|-----------------------|-----------------------|----------------|-----------------------|
| 0.00001268587 | 0.00002535507 | 0.002366766791 | 0.0000000001764604517 | 0.0000000002083019854 | 0.003761879822 | 0.0000000002096864289 |
| 0.00001270254 | 0.00002538841 | 0.002369876866 | 0.0000000001766923314 | 0.0000000002085757068 | 0.003766826409 | 0.0000000002099621507 |
| 0.00001271921 | 0.00002542175 | 0.00237298694  | 0.0000000001769242111 | 0.0000000002088494282 | 0.003771772997 | 0.0000000002102378725 |
| 0.00001273588 | 0.00002543842 | 0.002376097015 | 0.0000000001771560908 | 0.0000000002091231496 | 0.003774246291 | 0.0000000002103757334 |
| 0.00001275255 | 0.00002548843 | 0.00237920709  | 0.0000000001773879705 | 0.000000000209396871  | 0.003781666172 | 0.0000000002107893161 |
| 0.00001276922 | 0.0000255051  | 0.002382317164 | 0.0000000001776198502 | 0.0000000002096705924 | 0.003784139466 | 0.000000000210927177  |
| 0.00001278589 | 0.00002552177 | 0.002385427239 | 0.0000000001778517299 | 0.0000000002099443138 | 0.00378661276  | 0.0000000002110650379 |
| 0.00001280256 | 0.00002553844 | 0.002388537313 | 0.0000000001780836096 | 0.0000000002102180352 | 0.003789086053 | 0.0000000002112028988 |
| 0.00001281923 | 0.00002558845 | 0.002391647388 | 0.0000000001783154893 | 0.0000000002104917566 | 0.003796505935 | 0.0000000002116164815 |
| 0.0000128359  | 0.00002563846 | 0.002394757463 | 0.000000000178547369  | 0.000000000210765478  | 0.003803925816 | 0.0000000002120300642 |
| 0.00001285257 | 0.00002565513 | 0.002397867537 | 0.0000000001787792487 | 0.0000000002110391994 | 0.00380639911  | 0.0000000002121679251 |
| 0.00001286924 | 0.00002568847 | 0.002400977612 | 0.0000000001790111284 | 0.0000000002113129208 | 0.003811345697 | 0.0000000002124436469 |
| 0.00001288591 | 0.00002573848 | 0.002404087687 | 0.0000000001792430081 | 0.0000000002115866422 | 0.003818765579 | 0.0000000002128572296 |
| 0.00001290258 | 0.00002578849 | 0.002407197761 | 0.0000000001794748878 | 0.0000000002118603636 | 0.00382618546  | 0.0000000002132708123 |
| 0.00001291925 | 0.00002580516 | 0.002410307836 | 0.0000000001797067675 | 0.000000000212134085  | 0.003828658754 | 0.0000000002134086732 |
| 0.00001293592 | 0.00002585517 | 0.00241341791  | 0.0000000001799386472 | 0.0000000002124078064 | 0.003836078635 | 0.0000000002138222559 |
| 0.00001295259 | 0.00002588851 | 0.002416527985 | 0.0000000001801705269 | 0.0000000002126815278 | 0.003841025223 | 0.0000000002140979777 |
| 0.00001296926 | 0.00002590518 | 0.00241963806  | 0.0000000001804024066 | 0.0000000002129552492 | 0.003843498516 | 0.0000000002142358386 |
| 0.00001298593 | 0.00002592185 | 0.002422748134 | 0.0000000001806342863 | 0.0000000002132289706 | 0.00384597181  | 0.0000000002143736995 |
| 0.0000130026  | 0.00002595519 | 0.002425858209 | 0.000000000180866166  | 0.000000000213502692  | 0.003850918398 | 0.0000000002146494213 |
| 0.00001301927 | 0.00002598853 | 0.002428968284 | 0.0000000001810980457 | 0.0000000002137764134 | 0.003855864985 | 0.0000000002149251431 |
| 0.00001303594 | 0.00002602187 | 0.002432078358 | 0.0000000001813299254 | 0.0000000002140501348 | 0.003860811573 | 0.0000000002152008649 |
| 0.00001305261 | 0.00002603854 | 0.002435188433 | 0.0000000001815618051 | 0.0000000002143238562 | 0.003863284866 | 0.0000000002153387258 |
| 0.00001306928 | 0.00002610522 | 0.002438298507 | 0.0000000001817936848 | 0.0000000002145975776 | 0.003873178042 | 0.0000000002158901694 |
| 0.00001308595 | 0.00002613856 | 0.002441408582 | 0.0000000001820255645 | 0.000000000214871299  | 0.003878124629 | 0.0000000002161658912 |
| 0.00001310262 | 0.00002615523 | 0.002444518657 | 0.0000000001822574442 | 0.0000000002151450204 | 0.003880597923 | 0.0000000002163037521 |
| 0.00001311929 | 0.00002620524 | 0.002447628731 | 0.0000000001824893239 | 0.0000000002154187418 | 0.003888017804 | 0.0000000002167173348 |
| 0.00001313596 | 0.00002622191 | 0.002450738806 | 0.0000000001827212036 | 0.0000000002156924632 | 0.003890491098 | 0.0000000002168551957 |
| 0.00001315263 | 0.00002625525 | 0.002453848881 | 0.0000000001829530833 | 0.0000000002159661846 | 0.003895437685 | 0.0000000002171309175 |
| 0.0000131693  | 0.00002628859 | 0.002456958955 | 0.000000000183184963  | 0.000000000216239906  | 0.003900384273 | 0.0000000002174066393 |
| 0.00001318597 | 0.00002630526 | 0.00246006903  | 0.0000000001834168427 | 0.0000000002165136274 | 0.003902857567 | 0.0000000002175445002 |
| 0.00001320264 | 0.0000263386  | 0.002463179104 | 0.0000000001836487224 | 0.0000000002167873488 | 0.003907804154 | 0.000000000217820222  |
| 0.00001321931 | 0.00002638861 | 0.002466289179 | 0.0000000001838806021 | 0.0000000002170610702 | 0.003915224036 | 0.0000000002182338047 |
| 0.00001323598 | 0.00002645529 | 0.002469399254 | 0.0000000001841124818 | 0.0000000002173347916 | 0.003925117211 | 0.0000000002187852483 |
| 0.00001325265 | 0.00002648863 | 0.002472509328 | 0.0000000001843443615 | 0.000000000217608513  | 0.003930063798 | 0.0000000002190609701 |
| 0.00001326932 | 0.00002652197 | 0.002475619403 | 0.0000000001845762412 | 0.0000000002178822344 | 0.003935010386 | 0.0000000002193366919 |
| 0.00001328599 | 0.00002653864 | 0.002478729478 | 0.0000000001848081209 | 0.0000000002181559558 | 0.00393748368  | 0.0000000002194745528 |
| 0.00001330266 | 0.00002657198 | 0.002481839552 | 0.0000000001850400006 | 0.0000000002184296772 | 0.003942430267 | 0.0000000002197502746 |
| 0.00001331933 | 0.00002660532 | 0.002484949627 | 0.0000000001852718803 | 0.0000000002187033986 | 0.003947376855 | 0.0000000002200259964 |
| 0.000013336   | 0.00002663866 | 0.002488059701 | 0.00000000018550376   | 0.00000000021897712   | 0.003952323442 | 0.0000000002203017182 |

|               |               |                |                       |                       |                |                       |
|---------------|---------------|----------------|-----------------------|-----------------------|----------------|-----------------------|
| 0.00001335267 | 0.00002665533 | 0.002491169776 | 0.0000000001857356397 | 0.0000000002192508414 | 0.003954796736 | 0.0000000002204395791 |
| 0.00001336934 | 0.000026672   | 0.002494279851 | 0.0000000001859675194 | 0.0000000002195245628 | 0.00395727003  | 0.00000000022057744   |
| 0.00001338601 | 0.00002670534 | 0.002497389925 | 0.0000000001861993991 | 0.0000000002197982842 | 0.003962216617 | 0.0000000002208531618 |
| 0.00001340268 | 0.00002675535 | 0.0025005      | 0.0000000001864312788 | 0.0000000002200720056 | 0.003969636499 | 0.0000000002212667445 |
| 0.00001341935 | 0.00002678869 | 0.002503610075 | 0.0000000001866631585 | 0.000000000220345727  | 0.003974583086 | 0.0000000002215424663 |
| 0.00001343602 | 0.00002682203 | 0.002506720149 | 0.0000000001868950382 | 0.0000000002206194484 | 0.003979529674 | 0.0000000002218181881 |
| 0.00001345269 | 0.00002688871 | 0.002509830224 | 0.0000000001871269179 | 0.0000000002208931698 | 0.003989422849 | 0.0000000002223696317 |
| 0.00001346936 | 0.00002690538 | 0.002512940299 | 0.0000000001873587976 | 0.0000000002211668912 | 0.003991896142 | 0.0000000002225074926 |
| 0.00001348603 | 0.00002692205 | 0.002516050373 | 0.0000000001875906773 | 0.0000000002214406126 | 0.003994369436 | 0.0000000002226453535 |
| 0.0000135027  | 0.00002697206 | 0.002519160448 | 0.000000000187822557  | 0.000000000221714334  | 0.004001789318 | 0.0000000002230589362 |
| 0.00001351937 | 0.0000270054  | 0.002522270522 | 0.0000000001880544367 | 0.0000000002219880554 | 0.004006735905 | 0.000000000223334658  |
| 0.00001353604 | 0.00002705541 | 0.002525380597 | 0.0000000001882863164 | 0.0000000002222617768 | 0.004014155786 | 0.0000000002237482407 |
| 0.00001355271 | 0.00002723878 | 0.002528490672 | 0.0000000001885181961 | 0.0000000002225354982 | 0.004041362018 | 0.0000000002252647106 |
| 0.00001356938 | 0.00002710542 | 0.002531600746 | 0.0000000001887500758 | 0.0000000002228092196 | 0.004021575668 | 0.0000000002241618234 |
| 0.00001358605 | 0.00002713876 | 0.002534710821 | 0.0000000001889819555 | 0.000000000223082941  | 0.004026522255 | 0.0000000002244375452 |
| 0.00001360272 | 0.0000271721  | 0.002537820896 | 0.0000000001892138352 | 0.0000000002233566624 | 0.004031468843 | 0.000000000224713267  |
| 0.00001361939 | 0.00002718877 | 0.00254093097  | 0.0000000001894457149 | 0.0000000002236303838 | 0.004033942136 | 0.0000000002248511279 |
| 0.00001363606 | 0.00002723878 | 0.002544041045 | 0.0000000001896775946 | 0.0000000002239041052 | 0.004041362018 | 0.0000000002252647106 |
| 0.00001365273 | 0.00002727212 | 0.002547151119 | 0.0000000001899094743 | 0.0000000002241778266 | 0.004046308605 | 0.0000000002255404324 |
| 0.0000136694  | 0.00002730546 | 0.002550261194 | 0.000000000190141354  | 0.000000000224451548  | 0.004051255193 | 0.0000000002258161542 |
| 0.00001368607 | 0.0000273388  | 0.002553371269 | 0.0000000001903732337 | 0.0000000002247252694 | 0.00405620178  | 0.000000000226091876  |
| 0.00001370274 | 0.00002737214 | 0.002556481343 | 0.0000000001906051134 | 0.0000000002249989908 | 0.004061148368 | 0.0000000002263675978 |
| 0.00001371941 | 0.00002740548 | 0.002559591418 | 0.0000000001908369931 | 0.0000000002252727122 | 0.004066094955 | 0.0000000002266433196 |
| 0.00001373608 | 0.00002743882 | 0.002562701493 | 0.0000000001910688728 | 0.0000000002255464336 | 0.004071041543 | 0.0000000002269190414 |
| 0.00001375275 | 0.00002747216 | 0.002565811567 | 0.0000000001913007525 | 0.000000000225820155  | 0.004075988131 | 0.0000000002271947632 |
| 0.00001376942 | 0.00002752217 | 0.002568921642 | 0.0000000001915326322 | 0.0000000002260938764 | 0.004083408012 | 0.0000000002276083459 |
| 0.00001378609 | 0.00002755551 | 0.002572031716 | 0.0000000001917645119 | 0.0000000002263675978 | 0.004088354599 | 0.0000000002278840677 |
| 0.00001380276 | 0.00002758885 | 0.002575141791 | 0.0000000001919963916 | 0.0000000002266413192 | 0.004093301187 | 0.0000000002281597895 |
| 0.00001381943 | 0.00002762219 | 0.002578251866 | 0.0000000001922282713 | 0.0000000002269150406 | 0.004098247774 | 0.0000000002284355113 |
| 0.0000138361  | 0.00002765553 | 0.00258136194  | 0.000000000192460151  | 0.000000000227188762  | 0.004103194362 | 0.0000000002287112331 |
| 0.00001385277 | 0.00002768887 | 0.002584472015 | 0.0000000001926920307 | 0.0000000002274624834 | 0.00410814095  | 0.0000000002289869549 |
| 0.00001386944 | 0.00002772221 | 0.00258758209  | 0.0000000001929239104 | 0.0000000002277362048 | 0.004113087537 | 0.0000000002292626767 |
| 0.00001388611 | 0.00002775555 | 0.002590692164 | 0.0000000001931557901 | 0.0000000002280099262 | 0.004118034125 | 0.0000000002295383985 |
| 0.00001390278 | 0.00002777222 | 0.002593802239 | 0.0000000001933876698 | 0.0000000002282836476 | 0.004120507418 | 0.0000000002296762594 |
| 0.00001391945 | 0.00002782223 | 0.002596912313 | 0.0000000001936195495 | 0.000000000228557369  | 0.0041279273   | 0.0000000002300898421 |
| 0.00001393612 | 0.00002785557 | 0.002600022388 | 0.0000000001938514292 | 0.0000000002288310904 | 0.004132873887 | 0.0000000002303655639 |
| 0.00001395279 | 0.00002787224 | 0.002603132463 | 0.0000000001940833089 | 0.0000000002291048118 | 0.004135347181 | 0.0000000002305034248 |
| 0.00001396946 | 0.00002790558 | 0.002606242537 | 0.0000000001943151886 | 0.0000000002293785332 | 0.004140293769 | 0.0000000002307791466 |
| 0.00001398613 | 0.00002795559 | 0.002609352612 | 0.0000000001945470683 | 0.0000000002296522546 | 0.00414771365  | 0.0000000002311927293 |
| 0.0000140028  | 0.00002797226 | 0.002612462687 | 0.000000000194778948  | 0.000000000229925976  | 0.004150186944 | 0.0000000002313305902 |

|               |               |                |                       |                       |                |                       |
|---------------|---------------|----------------|-----------------------|-----------------------|----------------|-----------------------|
| 0.00001401947 | 0.0000280056  | 0.002615572761 | 0.0000000001950108277 | 0.0000000002301996974 | 0.004155133531 | 0.000000000231606312  |
| 0.00001403614 | 0.00002803894 | 0.002618682836 | 0.0000000001952427074 | 0.0000000002304734188 | 0.004160080119 | 0.0000000002318820338 |
| 0.00001405281 | 0.00002808895 | 0.00262179291  | 0.0000000001954745871 | 0.0000000002307471402 | 0.0041675      | 0.0000000002322956165 |
| 0.00001406948 | 0.00002812229 | 0.002624902985 | 0.0000000001957064668 | 0.0000000002310208616 | 0.004172446588 | 0.0000000002325713383 |
| 0.00001408615 | 0.00002813896 | 0.00262801306  | 0.0000000001959383465 | 0.000000000231294583  | 0.004174919881 | 0.0000000002327091992 |
| 0.00001410282 | 0.00002818897 | 0.002631123134 | 0.0000000001961702262 | 0.0000000002315683044 | 0.004182339763 | 0.0000000002331227819 |
| 0.00001411949 | 0.00002820564 | 0.002634233209 | 0.0000000001964021059 | 0.0000000002318420258 | 0.004184813056 | 0.0000000002332606428 |
| 0.00001413616 | 0.00002825565 | 0.002637343284 | 0.0000000001966339856 | 0.0000000002321157472 | 0.004192232938 | 0.0000000002336742255 |
| 0.00001415283 | 0.00002827232 | 0.002640453358 | 0.0000000001968658653 | 0.0000000002323894686 | 0.004194706231 | 0.0000000002338120864 |
| 0.0000141695  | 0.00002832233 | 0.002643563433 | 0.000000000197097745  | 0.00000000023266319   | 0.004202126113 | 0.0000000002342256691 |
| 0.00001418617 | 0.00002835567 | 0.002646673507 | 0.0000000001973296247 | 0.0000000002329369114 | 0.0042070727   | 0.0000000002345013909 |
| 0.00001420284 | 0.00002837234 | 0.002649783582 | 0.0000000001975615044 | 0.0000000002332106328 | 0.004209545994 | 0.0000000002346392518 |
| 0.00001421951 | 0.00002842235 | 0.002652893657 | 0.0000000001977933841 | 0.0000000002334843542 | 0.004216965875 | 0.0000000002350528345 |
| 0.00001423618 | 0.00002845569 | 0.002656003731 | 0.0000000001980252638 | 0.0000000002337580756 | 0.004221912463 | 0.0000000002353285563 |
| 0.00001425285 | 0.00002847236 | 0.002659113806 | 0.0000000001982571435 | 0.000000000234031797  | 0.004224385757 | 0.0000000002354664172 |
| 0.00001426952 | 0.00002852237 | 0.002662223881 | 0.0000000001984890232 | 0.0000000002343055184 | 0.004231805638 | 0.0000000002358799999 |
| 0.00001428619 | 0.00002855571 | 0.002665333955 | 0.0000000001987209029 | 0.0000000002345792398 | 0.004236752226 | 0.0000000002361557217 |
| 0.00001430286 | 0.00002858905 | 0.00266844403  | 0.0000000001989527826 | 0.0000000002348529612 | 0.004241698813 | 0.0000000002364314435 |
| 0.00001431953 | 0.00002860572 | 0.002671554104 | 0.0000000001991846623 | 0.0000000002351266826 | 0.004244172107 | 0.0000000002365693044 |
| 0.0000143362  | 0.00002863906 | 0.002674664179 | 0.000000000199416542  | 0.000000000235400404  | 0.004249118694 | 0.0000000002368450262 |
| 0.00001435287 | 0.0000286724  | 0.002677774254 | 0.0000000001996484217 | 0.0000000002356741254 | 0.004254065282 | 0.000000000237120748  |
| 0.00001436954 | 0.00002872241 | 0.002680884328 | 0.0000000001998803014 | 0.0000000002359478468 | 0.004261485163 | 0.0000000002375343307 |
| 0.00001438621 | 0.00002873908 | 0.002683994403 | 0.0000000002001121811 | 0.0000000002362215682 | 0.004263958457 | 0.0000000002376721916 |
| 0.00001440288 | 0.00002878909 | 0.002687104478 | 0.0000000002003440608 | 0.0000000002364952896 | 0.004271378338 | 0.0000000002380857743 |
| 0.00001441955 | 0.00002882243 | 0.002690214552 | 0.0000000002005759405 | 0.000000000236769011  | 0.004276324926 | 0.0000000002383614961 |
| 0.00001443622 | 0.0000288391  | 0.002693324627 | 0.0000000002008078202 | 0.0000000002370427324 | 0.00427879822  | 0.000000000238499357  |
| 0.00001445289 | 0.00002888911 | 0.002696434701 | 0.0000000002010396999 | 0.0000000002373164538 | 0.004286218101 | 0.0000000002389129397 |
| 0.00001446956 | 0.00002890578 | 0.002699544776 | 0.0000000002012715796 | 0.0000000002375901752 | 0.004288691395 | 0.0000000002390508006 |
| 0.00001448623 | 0.00002893912 | 0.002702654851 | 0.0000000002015034593 | 0.0000000002378638966 | 0.004293637982 | 0.0000000002393265224 |
| 0.0000145029  | 0.00002897246 | 0.002705764925 | 0.000000000201735339  | 0.000000000238137618  | 0.00429858457  | 0.0000000002396022442 |
| 0.00001451957 | 0.00002898913 | 0.002708875    | 0.0000000002019672187 | 0.0000000002384113394 | 0.004301057864 | 0.0000000002397401051 |
| 0.00001453624 | 0.00002903914 | 0.002711985075 | 0.0000000002021990984 | 0.0000000002386850608 | 0.004308477745 | 0.0000000002401536878 |
| 0.00001455291 | 0.00002905581 | 0.002715095149 | 0.0000000002024309781 | 0.0000000002389587822 | 0.004310951039 | 0.0000000002402915487 |
| 0.00001456958 | 0.00002910582 | 0.002718205224 | 0.0000000002026628578 | 0.0000000002392325036 | 0.00431837092  | 0.0000000002407051314 |
| 0.00001458625 | 0.00002913916 | 0.002721315299 | 0.0000000002028947375 | 0.000000000239506225  | 0.004323317507 | 0.0000000002409808532 |
| 0.00001460292 | 0.0000291725  | 0.002724425373 | 0.0000000002031266172 | 0.0000000002397799464 | 0.004328264095 | 0.000000000241256575  |
| 0.00001461959 | 0.00002920584 | 0.002727535448 | 0.0000000002033584969 | 0.0000000002400536678 | 0.004333210682 | 0.0000000002415322968 |
| 0.00001463626 | 0.00002925585 | 0.002730645522 | 0.0000000002035903766 | 0.0000000002403273892 | 0.004340630564 | 0.0000000002419458795 |
| 0.00001465293 | 0.00002927252 | 0.002733755597 | 0.0000000002038222563 | 0.0000000002406011106 | 0.004343103858 | 0.0000000002420837404 |
| 0.0000146696  | 0.00002932253 | 0.002736865672 | 0.000000000204054136  | 0.000000000240874832  | 0.004350523739 | 0.0000000002424973231 |

|               |               |                |                       |                       |                |                       |
|---------------|---------------|----------------|-----------------------|-----------------------|----------------|-----------------------|
| 0.00001468627 | 0.00002935587 | 0.002739975746 | 0.0000000002042860157 | 0.0000000002411485534 | 0.004355470326 | 0.0000000002427730449 |
| 0.00001470294 | 0.00002938921 | 0.002743085821 | 0.0000000002045178954 | 0.0000000002414222748 | 0.004360416914 | 0.0000000002430487667 |
| 0.00001471961 | 0.00002940588 | 0.002746195896 | 0.0000000002047497751 | 0.0000000002416959962 | 0.004362890208 | 0.0000000002431866276 |
| 0.00001473628 | 0.00002945589 | 0.00274930597  | 0.0000000002049816548 | 0.0000000002419697176 | 0.004370310089 | 0.0000000002436002103 |
| 0.00001475295 | 0.00002947256 | 0.002752416045 | 0.0000000002052135345 | 0.000000000242243439  | 0.004372783383 | 0.0000000002437380712 |
| 0.00001476962 | 0.00002952257 | 0.002755526119 | 0.0000000002054454142 | 0.0000000002425171604 | 0.004380203264 | 0.0000000002441516539 |
| 0.00001478629 | 0.00002953924 | 0.002758636194 | 0.0000000002056772939 | 0.0000000002427908818 | 0.004382676558 | 0.0000000002442895148 |
| 0.00001480296 | 0.00002958925 | 0.002761746269 | 0.0000000002059091736 | 0.0000000002430646032 | 0.004390096439 | 0.0000000002447030975 |
| 0.00001481963 | 0.00002962259 | 0.002764856343 | 0.0000000002061410533 | 0.0000000002433383246 | 0.004395043027 | 0.0000000002449788193 |
| 0.0000148363  | 0.00002965593 | 0.002767966418 | 0.000000000206372933  | 0.000000000243612046  | 0.004399989614 | 0.0000000002452545411 |
| 0.00001485297 | 0.00002968927 | 0.002771076493 | 0.0000000002066048127 | 0.0000000002438857674 | 0.004404936202 | 0.0000000002455302629 |
| 0.00001486964 | 0.00002972261 | 0.002774186567 | 0.0000000002068366924 | 0.0000000002441594888 | 0.004409882789 | 0.0000000002458059847 |
| 0.00001488631 | 0.00002975595 | 0.002777296642 | 0.0000000002070685721 | 0.0000000002444332102 | 0.004414829377 | 0.0000000002460817065 |
| 0.00001490298 | 0.00002977262 | 0.002780406716 | 0.0000000002073004518 | 0.0000000002447069316 | 0.004417302671 | 0.0000000002462195674 |
| 0.00001491965 | 0.00002980596 | 0.002783516791 | 0.0000000002075323315 | 0.000000000244980653  | 0.004422249258 | 0.0000000002464952892 |
| 0.00001493632 | 0.0000298393  | 0.002786626866 | 0.0000000002077642112 | 0.0000000002452543744 | 0.004427195846 | 0.000000000246771011  |
| 0.00001495299 | 0.00002985597 | 0.00278973694  | 0.0000000002079960909 | 0.0000000002455280958 | 0.004429669139 | 0.0000000002469088719 |
| 0.00001496966 | 0.00002988931 | 0.002792847015 | 0.0000000002082279706 | 0.0000000002458018172 | 0.004434615727 | 0.0000000002471845937 |
| 0.00001498633 | 0.00002993932 | 0.00279595709  | 0.0000000002084598503 | 0.0000000002460755386 | 0.004442035608 | 0.0000000002475981764 |
| 0.000015003   | 0.00002997266 | 0.002799067164 | 0.00000000020869173   | 0.00000000024634926   | 0.004446982196 | 0.0000000002478738982 |
| 0.00001501967 | 0.00003002267 | 0.002802177239 | 0.0000000002089236097 | 0.0000000002466229814 | 0.004454402077 | 0.0000000002482874809 |
| 0.00001503634 | 0.00003005601 | 0.002805287313 | 0.0000000002091554894 | 0.0000000002468967028 | 0.004459348665 | 0.0000000002485632027 |
| 0.00001505301 | 0.00003007268 | 0.002808397388 | 0.0000000002093873691 | 0.0000000002471704242 | 0.004461821958 | 0.0000000002487010636 |
| 0.00001506968 | 0.00003010602 | 0.002811507463 | 0.0000000002096192488 | 0.0000000002474441456 | 0.004466768546 | 0.0000000002489767854 |
| 0.00001508635 | 0.00003015603 | 0.002814617537 | 0.0000000002098511285 | 0.000000000247717867  | 0.004474188427 | 0.0000000002493903681 |
| 0.00001510302 | 0.0000301727  | 0.002817727612 | 0.0000000002100830082 | 0.0000000002479915884 | 0.004476661721 | 0.0000000002495282229 |
| 0.00001511969 | 0.00003018937 | 0.002820837687 | 0.0000000002103148879 | 0.0000000002482653098 | 0.004479135015 | 0.0000000002496660899 |
| 0.00001513636 | 0.00003020604 | 0.002823947761 | 0.0000000002105467676 | 0.0000000002485390312 | 0.004481608309 | 0.0000000002498039508 |
| 0.00001515303 | 0.00003025605 | 0.002827057836 | 0.0000000002107786473 | 0.0000000002488127526 | 0.00448902819  | 0.0000000002502175335 |
| 0.0000151697  | 0.00003030606 | 0.00283016791  | 0.000000000211010527  | 0.000000000249086474  | 0.004496448071 | 0.0000000002506311162 |
| 0.00001518637 | 0.00003032273 | 0.002833277985 | 0.0000000002112424067 | 0.0000000002493601954 | 0.004498921365 | 0.0000000002507689771 |
| 0.00001520304 | 0.00003037274 | 0.00283638806  | 0.0000000002114742864 | 0.0000000002496339168 | 0.004506341246 | 0.0000000002511825598 |
| 0.00001521971 | 0.00003042275 | 0.002839498134 | 0.0000000002117061661 | 0.0000000002499076382 | 0.004513761128 | 0.0000000002515961425 |
| 0.00001523638 | 0.00003045609 | 0.002842608209 | 0.0000000002119380458 | 0.0000000002501813596 | 0.004518707715 | 0.0000000002518718643 |
| 0.00001525305 | 0.00003048943 | 0.002845718284 | 0.0000000002121699255 | 0.000000000250455081  | 0.004523654303 | 0.0000000002521475861 |
| 0.00001526972 | 0.00003052277 | 0.002848828358 | 0.0000000002124018052 | 0.0000000002507288024 | 0.00452860089  | 0.0000000002524233079 |
| 0.00001528639 | 0.00003055611 | 0.002851938433 | 0.0000000002126336849 | 0.0000000002510025238 | 0.004533547478 | 0.0000000002526990297 |
| 0.00001530306 | 0.00003058945 | 0.002855048507 | 0.0000000002128655646 | 0.0000000002512762452 | 0.004538494065 | 0.0000000002529747515 |
| 0.00001531973 | 0.00003062279 | 0.002858158582 | 0.0000000002130974443 | 0.0000000002515499666 | 0.004543440653 | 0.0000000002532504733 |
| 0.0000153364  | 0.00003065613 | 0.002861268657 | 0.000000000213329324  | 0.000000000251823688  | 0.00454838724  | 0.0000000002535261951 |

|               |               |                |                       |                       |                |                       |
|---------------|---------------|----------------|-----------------------|-----------------------|----------------|-----------------------|
| 0.00001535307 | 0.00003068947 | 0.002864378731 | 0.0000000002135612037 | 0.0000000002520974094 | 0.00455333828  | 0.0000000002538019169 |
| 0.00001536974 | 0.00003070614 | 0.002867488806 | 0.0000000002137930834 | 0.0000000002523711308 | 0.004555807122 | 0.0000000002539397778 |
| 0.00001538641 | 0.00003073948 | 0.002870598881 | 0.0000000002140249631 | 0.0000000002526448522 | 0.004560753709 | 0.0000000002542154996 |
| 0.00001540308 | 0.00003077282 | 0.002873708955 | 0.0000000002142568428 | 0.0000000002529185736 | 0.004565700297 | 0.0000000002544912214 |
| 0.00001541975 | 0.00003082283 | 0.00287681903  | 0.0000000002144887225 | 0.000000000253192295  | 0.004573120178 | 0.0000000002549048041 |
| 0.00001543642 | 0.0000308395  | 0.002879929104 | 0.0000000002147206022 | 0.0000000002534660164 | 0.004575593472 | 0.000000000255042665  |
| 0.00001545309 | 0.00003085617 | 0.002883039179 | 0.0000000002149524819 | 0.0000000002537397378 | 0.004578066766 | 0.0000000002551805259 |
| 0.00001546976 | 0.00003090618 | 0.002886149254 | 0.0000000002151843616 | 0.0000000002540134592 | 0.004585486647 | 0.0000000002555941086 |
| 0.00001548643 | 0.00003095619 | 0.002889259328 | 0.0000000002154162413 | 0.0000000002542871806 | 0.004592906528 | 0.0000000002560076913 |
| 0.0000155031  | 0.00003098953 | 0.002892369403 | 0.000000000215648121  | 0.000000000254560902  | 0.004597853116 | 0.0000000002562834131 |
| 0.00001551977 | 0.00003102287 | 0.002895479478 | 0.0000000002158800007 | 0.0000000002548346234 | 0.004602799703 | 0.0000000002565591349 |
| 0.00001553644 | 0.00003103954 | 0.002898589552 | 0.0000000002161118804 | 0.0000000002551083448 | 0.004605272997 | 0.0000000002566969958 |
| 0.00001555311 | 0.00003107288 | 0.002901699627 | 0.0000000002163437601 | 0.0000000002553820662 | 0.004610219585 | 0.0000000002569727176 |
| 0.00001556978 | 0.00003108955 | 0.002904809701 | 0.0000000002165756398 | 0.0000000002556557876 | 0.004612692878 | 0.0000000002571105785 |
| 0.00001558645 | 0.00003113956 | 0.002907919776 | 0.0000000002168075195 | 0.000000000255929509  | 0.00462011276  | 0.0000000002575241612 |
| 0.00001560312 | 0.00003115623 | 0.002911029851 | 0.0000000002170393992 | 0.0000000002562032304 | 0.004622586053 | 0.0000000002576620221 |
| 0.00001561979 | 0.00003120624 | 0.002914139925 | 0.0000000002172712789 | 0.0000000002564769518 | 0.004630005935 | 0.0000000002580756048 |
| 0.00001563646 | 0.00003123958 | 0.00291725     | 0.0000000002175031586 | 0.0000000002567506732 | 0.004634952522 | 0.0000000002583513266 |
| 0.00001565313 | 0.00003127292 | 0.002920360075 | 0.0000000002177350383 | 0.0000000002570243946 | 0.00463989911  | 0.0000000002586270484 |
| 0.0000156698  | 0.00003132293 | 0.002923470149 | 0.000000000217966918  | 0.000000000257298116  | 0.004647318991 | 0.0000000002590406311 |
| 0.00001568647 | 0.0000313396  | 0.002926580224 | 0.0000000002181987977 | 0.0000000002575718374 | 0.004649792285 | 0.000000000259178492  |
| 0.00001570314 | 0.00003135627 | 0.002929690299 | 0.0000000002184306774 | 0.0000000002578455588 | 0.004652265579 | 0.0000000002593163529 |
| 0.00001571981 | 0.00003138961 | 0.002932800373 | 0.0000000002186625571 | 0.0000000002581192802 | 0.004657212166 | 0.0000000002595920747 |
| 0.00001573648 | 0.00003143962 | 0.002935910448 | 0.0000000002188944368 | 0.0000000002583930016 | 0.004664632047 | 0.0000000002600056574 |
| 0.00001575315 | 0.00003147296 | 0.002939020522 | 0.0000000002191263165 | 0.000000000258666723  | 0.004669578635 | 0.0000000002602813792 |
| 0.00001576982 | 0.0000315063  | 0.002942130597 | 0.0000000002193581962 | 0.0000000002589404444 | 0.004674525223 | 0.000000000260557101  |
| 0.00001578649 | 0.00003153964 | 0.002945240672 | 0.0000000002195900759 | 0.0000000002592141658 | 0.00467947181  | 0.0000000002608328228 |
| 0.00001580316 | 0.00003158965 | 0.002948350746 | 0.0000000002198219556 | 0.0000000002594878872 | 0.004686891691 | 0.0000000002612464055 |
| 0.00001581983 | 0.00003160632 | 0.002951460821 | 0.0000000002200538353 | 0.0000000002597616086 | 0.004689364985 | 0.0000000002613842664 |
| 0.0000158365  | 0.00003165633 | 0.002954570896 | 0.000000000220285715  | 0.00000000026003533   | 0.004696784866 | 0.0000000002617978491 |
| 0.00001585317 | 0.000031673   | 0.00295768097  | 0.0000000002205175947 | 0.0000000002603090514 | 0.00469925816  | 0.00000000026193571   |
| 0.00001586984 | 0.00003170634 | 0.002960791045 | 0.0000000002207494744 | 0.0000000002605827728 | 0.004704204748 | 0.0000000002622114318 |
| 0.00001588651 | 0.00003173968 | 0.002963901119 | 0.0000000002209813541 | 0.0000000002608564942 | 0.004709151335 | 0.0000000002624871536 |
| 0.00001590318 | 0.00003178969 | 0.002967011194 | 0.0000000002212132338 | 0.0000000002611302156 | 0.004716571217 | 0.0000000002629007363 |
| 0.00001591985 | 0.00003180636 | 0.002970121269 | 0.0000000002214451135 | 0.000000000261403937  | 0.00471904451  | 0.0000000002630385972 |
| 0.00001593652 | 0.00003185637 | 0.002973231343 | 0.0000000002216769932 | 0.0000000002616776584 | 0.004726464392 | 0.0000000002634521799 |
| 0.00001595319 | 0.00003187304 | 0.002976341418 | 0.0000000002219088729 | 0.0000000002619513798 | 0.004728937685 | 0.0000000002635900408 |
| 0.00001596986 | 0.00003192305 | 0.002979451493 | 0.0000000002221407526 | 0.0000000002622251012 | 0.004736357567 | 0.0000000002640036235 |
| 0.00001598653 | 0.00003193972 | 0.002982561567 | 0.0000000002223726323 | 0.0000000002624988226 | 0.004738830861 | 0.0000000002641414844 |
| 0.0000160032  | 0.00003197306 | 0.002985671642 | 0.000000000222604512  | 0.000000000262772544  | 0.004743777448 | 0.0000000002644172062 |



|               |               |                |                       |                       |                |                       |
|---------------|---------------|----------------|-----------------------|-----------------------|----------------|-----------------------|
| 0.00001601987 | 0.0000320064  | 0.002988781716 | 0.000000000228363917  | 0.0000000002630462654 | 0.004748724036 | 0.000000000264692928  |
| 0.00001603654 | 0.00003203974 | 0.002991891791 | 0.0000000002230682714 | 0.0000000002633199868 | 0.004753670623 | 0.0000000002649686498 |
| 0.00001605321 | 0.00003207308 | 0.002995001866 | 0.0000000002233001511 | 0.0000000002635937082 | 0.004758617211 | 0.0000000002652443716 |
| 0.00001606988 | 0.00003210642 | 0.00299811194  | 0.0000000002235320308 | 0.0000000002638674296 | 0.004763563798 | 0.0000000002655200934 |
| 0.00001608655 | 0.00003212309 | 0.003001222015 | 0.0000000002237639105 | 0.000000000264141151  | 0.004766037092 | 0.0000000002656579543 |
| 0.00001610322 | 0.00003215643 | 0.00300433209  | 0.0000000002239957902 | 0.0000000002644148724 | 0.00477098368  | 0.0000000002659336761 |
| 0.00001611989 | 0.00003220644 | 0.003007442164 | 0.0000000002242276699 | 0.0000000002646885938 | 0.004778403561 | 0.0000000002663472588 |
| 0.00001613656 | 0.00003225645 | 0.003010552239 | 0.0000000002244595496 | 0.0000000002649623152 | 0.004785823442 | 0.0000000002667608415 |
| 0.00001615323 | 0.00003227312 | 0.003013662313 | 0.0000000002246914293 | 0.0000000002652360366 | 0.004788296736 | 0.0000000002668987024 |
| 0.0000161699  | 0.00003230646 | 0.003016772388 | 0.000000000224923309  | 0.000000000265509758  | 0.004793243323 | 0.0000000002671744242 |
| 0.00001618657 | 0.0000323398  | 0.003019882463 | 0.0000000002251551887 | 0.0000000002657834794 | 0.004798189911 | 0.000000000267450146  |
| 0.00001620324 | 0.00003235647 | 0.003022992537 | 0.0000000002253870684 | 0.0000000002660572008 | 0.004800663205 | 0.0000000002675880069 |
| 0.00001621991 | 0.00003238981 | 0.003026102612 | 0.0000000002256189481 | 0.0000000002663309222 | 0.004805609792 | 0.0000000002678637287 |
| 0.00001623658 | 0.00003243982 | 0.003029212687 | 0.0000000002258508278 | 0.0000000002666046436 | 0.004813029674 | 0.0000000002682773114 |
| 0.00001625325 | 0.00003248983 | 0.003032322761 | 0.0000000002260827075 | 0.000000000266878365  | 0.004820449555 | 0.0000000002686908941 |
| 0.00001626992 | 0.00003252317 | 0.003035432836 | 0.0000000002263145872 | 0.0000000002671520864 | 0.004825396142 | 0.0000000002689666159 |
| 0.00001628659 | 0.00003255651 | 0.00303854291  | 0.0000000002265464669 | 0.0000000002674258078 | 0.00483034273  | 0.0000000002692423377 |
| 0.00001630326 | 0.00003258985 | 0.003041652985 | 0.0000000002267783466 | 0.0000000002676995292 | 0.004835289318 | 0.0000000002695180595 |
| 0.00001631993 | 0.00003260652 | 0.00304476306  | 0.0000000002270102263 | 0.0000000002679732506 | 0.004837762611 | 0.0000000002696559204 |
| 0.0000163366  | 0.00003265653 | 0.003047873134 | 0.000000000227242106  | 0.000000000268246972  | 0.004845182493 | 0.0000000002700695031 |
| 0.00001635327 | 0.0000326732  | 0.003050983209 | 0.0000000002274739857 | 0.0000000002685206934 | 0.004847655786 | 0.000000000270207364  |
| 0.00001636994 | 0.00003270654 | 0.003054093284 | 0.0000000002277058654 | 0.0000000002687944148 | 0.004852602374 | 0.0000000002704830858 |
| 0.00001638661 | 0.00003273988 | 0.003057203358 | 0.0000000002279377451 | 0.0000000002690681362 | 0.004857548961 | 0.0000000002707588076 |
| 0.00001640328 | 0.00003278989 | 0.003060313433 | 0.0000000002281696248 | 0.0000000002693418576 | 0.004864968843 | 0.0000000002711723903 |
| 0.00001641995 | 0.00003282323 | 0.003063423507 | 0.0000000002284015045 | 0.000000000269615579  | 0.00486991543  | 0.0000000002714481121 |
| 0.00001643662 | 0.0000328399  | 0.003066533582 | 0.0000000002286333842 | 0.0000000002698893004 | 0.004872388724 | 0.000000000271585973  |
| 0.00001645329 | 0.00003288991 | 0.003069643657 | 0.0000000002288652639 | 0.0000000002701630218 | 0.004879808605 | 0.0000000002719995557 |
| 0.00001646996 | 0.00003292325 | 0.003072753731 | 0.0000000002290971436 | 0.0000000002704367432 | 0.004884755193 | 0.0000000002722752775 |
| 0.00001648663 | 0.00003293992 | 0.003075863806 | 0.0000000002293290233 | 0.0000000002707104646 | 0.004887228487 | 0.0000000002724131384 |
| 0.0000165033  | 0.00003297326 | 0.003078973881 | 0.000000000229560903  | 0.000000000270984186  | 0.004892175074 | 0.0000000002726888602 |
| 0.00001651997 | 0.00003302327 | 0.003082083955 | 0.0000000002297927827 | 0.0000000002712579074 | 0.004899594955 | 0.0000000002731024429 |
| 0.00001653664 | 0.00003305661 | 0.00308519403  | 0.0000000002300246624 | 0.0000000002715316288 | 0.004904541543 | 0.0000000002733781647 |
| 0.00001655331 | 0.00003307328 | 0.003088304104 | 0.0000000002302565421 | 0.0000000002718053502 | 0.004907014837 | 0.0000000002735160256 |
| 0.00001656998 | 0.00003312329 | 0.003091414179 | 0.0000000002304884218 | 0.0000000002720790716 | 0.004914434718 | 0.0000000002739296083 |
| 0.00001658665 | 0.00003315663 | 0.003094524254 | 0.0000000002307203015 | 0.000000000272352793  | 0.004919381306 | 0.0000000002742053301 |
| 0.00001660332 | 0.0000331733  | 0.003097634328 | 0.0000000002309521812 | 0.0000000002726265144 | 0.004921854599 | 0.000000000274343191  |
| 0.00001661999 | 0.00003322331 | 0.003100744403 | 0.0000000002311840609 | 0.0000000002729002358 | 0.004929274481 | 0.0000000002747567737 |
| 0.00001663666 | 0.00003325665 | 0.003103854478 | 0.0000000002314159406 | 0.0000000002731739572 | 0.004934221068 | 0.0000000002750324955 |
| 0.00001665333 | 0.00003328999 | 0.003106964552 | 0.0000000002316478203 | 0.0000000002734476786 | 0.004939167656 | 0.0000000002753082173 |
| 0.00001667    | 0.00003332333 | 0.003110074627 | 0.0000000002318797    | 0.0000000002737214    | 0.004944114243 | 0.0000000002755839391 |

|               |               |                |                       |                       |                |                       |
|---------------|---------------|----------------|-----------------------|-----------------------|----------------|-----------------------|
| 0.00001668667 | 0.00003335667 | 0.003113184701 | 0.0000000002321115797 | 0.0000000002739951214 | 0.004949060831 | 0.0000000002758596609 |
| 0.00001670334 | 0.00003339001 | 0.003116294776 | 0.0000000002323434594 | 0.0000000002742688428 | 0.004954007418 | 0.0000000002761353827 |
| 0.00001672001 | 0.00003340668 | 0.003119404851 | 0.0000000002325753391 | 0.0000000002745425642 | 0.004956480712 | 0.0000000002762732436 |
| 0.00001673668 | 0.00003344002 | 0.003122514925 | 0.0000000002328072188 | 0.0000000002748162856 | 0.0049614273   | 0.0000000002765489654 |
| 0.00001675335 | 0.00003349003 | 0.003125625    | 0.0000000002330390985 | 0.000000000275090007  | 0.004968847181 | 0.0000000002769625481 |
| 0.00001677002 | 0.00003352337 | 0.003128735075 | 0.0000000002332709782 | 0.0000000002753637284 | 0.004973793769 | 0.0000000002772382699 |
| 0.00001678669 | 0.00003354004 | 0.003131845149 | 0.0000000002335028579 | 0.0000000002756374498 | 0.004976267062 | 0.0000000002773761308 |
| 0.00001680336 | 0.00003355671 | 0.003134955224 | 0.0000000002337347376 | 0.0000000002759111712 | 0.004978740356 | 0.0000000002775139917 |
| 0.00001682003 | 0.00003357338 | 0.003138065299 | 0.0000000002339666173 | 0.0000000002761848926 | 0.00498121365  | 0.0000000002776518526 |
| 0.0000168367  | 0.00003360672 | 0.003141175373 | 0.000000000234198497  | 0.000000000276458614  | 0.004986160237 | 0.0000000002779275744 |
| 0.00001685337 | 0.00003364006 | 0.003144285448 | 0.0000000002344303767 | 0.0000000002767323354 | 0.004991106825 | 0.0000000002782032962 |
| 0.00001687004 | 0.00003365673 | 0.003147395522 | 0.0000000002346622564 | 0.0000000002770060568 | 0.004993580119 | 0.0000000002783411571 |
| 0.00001688671 | 0.0000336734  | 0.003150505597 | 0.0000000002348941361 | 0.0000000002772797782 | 0.004996053412 | 0.000000000278479018  |
| 0.00001690338 | 0.00003370674 | 0.003153615672 | 0.0000000002351260158 | 0.0000000002775534996 | 0.005001       | 0.0000000002787547398 |
| 0.00001692005 | 0.00003372341 | 0.003156725746 | 0.0000000002353578955 | 0.000000000277827221  | 0.005003473294 | 0.0000000002788926007 |
| 0.00001693672 | 0.00003375675 | 0.003159835821 | 0.0000000002355897752 | 0.0000000002781009424 | 0.005008419881 | 0.0000000002791683225 |
| 0.00001695339 | 0.00003377342 | 0.003162945896 | 0.0000000002358216549 | 0.0000000002783746638 | 0.005010893175 | 0.0000000002793061834 |
| 0.00001697006 | 0.00003379009 | 0.00316605597  | 0.0000000002360535346 | 0.0000000002786483852 | 0.005013366469 | 0.0000000002794440443 |
| 0.00001698673 | 0.00003380676 | 0.003169166045 | 0.0000000002362854143 | 0.0000000002789221066 | 0.005015839763 | 0.0000000002795819052 |
| 0.0000170034  | 0.0000338401  | 0.003172276119 | 0.000000000236517294  | 0.000000000279195828  | 0.00502078635  | 0.000000000279857627  |
| 0.00001702007 | 0.00003387344 | 0.003175386194 | 0.0000000002367491737 | 0.0000000002794695494 | 0.005025732938 | 0.0000000002801333488 |
| 0.00001703674 | 0.00003389011 | 0.003178496269 | 0.0000000002369810534 | 0.0000000002797432708 | 0.005028206231 | 0.0000000002802712097 |
| 0.00001705341 | 0.00003392345 | 0.003181606343 | 0.0000000002372129331 | 0.0000000002800169922 | 0.005033152819 | 0.0000000002805469315 |
| 0.00001707008 | 0.00003399013 | 0.003184716418 | 0.0000000002374448128 | 0.0000000002802907136 | 0.005043045994 | 0.0000000002810983751 |
| 0.00001708675 | 0.0000340068  | 0.003187826493 | 0.0000000002376766925 | 0.000000000280564435  | 0.005045519288 | 0.000000000281236236  |
| 0.00001710342 | 0.00003404014 | 0.003190936567 | 0.0000000002379085722 | 0.0000000002808381564 | 0.005050465875 | 0.0000000002815119578 |
| 0.00001712009 | 0.00003407348 | 0.003194046642 | 0.0000000002381404519 | 0.0000000002811118778 | 0.005055412463 | 0.0000000002817876796 |
| 0.00001713676 | 0.00003409015 | 0.003197156716 | 0.0000000002383723316 | 0.0000000002813855992 | 0.005057885757 | 0.0000000002819255405 |
| 0.00001715343 | 0.00003412349 | 0.003200266791 | 0.0000000002386042113 | 0.0000000002816593206 | 0.005062832344 | 0.0000000002822012623 |
| 0.0000171701  | 0.00003414016 | 0.003203376866 | 0.000000000238836091  | 0.000000000281933042  | 0.005065305638 | 0.0000000002823391232 |
| 0.00001718677 | 0.00003419017 | 0.00320648694  | 0.0000000002390679707 | 0.0000000002822067634 | 0.005072725519 | 0.0000000002827527059 |
| 0.00001720344 | 0.00003422351 | 0.003209597015 | 0.0000000002392998504 | 0.0000000002824804848 | 0.005077672107 | 0.0000000002830284277 |
| 0.00001722011 | 0.00003424018 | 0.00321270709  | 0.0000000002395317301 | 0.0000000002827542062 | 0.005080145401 | 0.0000000002831662886 |
| 0.00001723678 | 0.00003427352 | 0.003215817164 | 0.0000000002397636098 | 0.0000000002830279276 | 0.005085091988 | 0.0000000002834420104 |
| 0.00001725345 | 0.00003430686 | 0.003218927239 | 0.0000000002399954895 | 0.000000000283301649  | 0.005090038576 | 0.0000000002837177322 |
| 0.00001727012 | 0.00003435687 | 0.003222037313 | 0.0000000002402273692 | 0.0000000002835753704 | 0.005097458457 | 0.0000000002841313149 |
| 0.00001728679 | 0.00003440688 | 0.003225147388 | 0.0000000002404592489 | 0.0000000002838490918 | 0.005104878338 | 0.0000000002845448976 |
| 0.00001730346 | 0.00003442355 | 0.003228257463 | 0.0000000002406911286 | 0.0000000002841228132 | 0.005107351632 | 0.0000000002846827585 |
| 0.00001732013 | 0.00003444022 | 0.003231367537 | 0.0000000002409230083 | 0.0000000002843965346 | 0.005109824926 | 0.0000000002848206194 |
| 0.0000173368  | 0.00003447356 | 0.003234477612 | 0.000000000241154888  | 0.000000000284670256  | 0.005114771513 | 0.0000000002850963412 |

|               |               |                |                       |                       |                |                       |
|---------------|---------------|----------------|-----------------------|-----------------------|----------------|-----------------------|
| 0.00001735347 | 0.0000345069  | 0.003237587687 | 0.0000000002413867677 | 0.0000000002849439774 | 0.005119718101 | 0.000000000285372063  |
| 0.00001737014 | 0.00003452357 | 0.003240697761 | 0.0000000002416186474 | 0.0000000002852176988 | 0.005122191395 | 0.0000000002855099239 |
| 0.00001738681 | 0.00003457358 | 0.003243807836 | 0.0000000002418505271 | 0.0000000002854914202 | 0.005129611276 | 0.0000000002859235066 |
| 0.00001740348 | 0.00003460692 | 0.00324691791  | 0.0000000002420824068 | 0.0000000002857651416 | 0.005134557864 | 0.0000000002861992284 |
| 0.00001742015 | 0.00003462359 | 0.003250027985 | 0.0000000002423142865 | 0.000000000286038863  | 0.005137031157 | 0.0000000002863370893 |
| 0.00001743682 | 0.0000346736  | 0.00325313806  | 0.0000000002425461662 | 0.0000000002863125844 | 0.005144451039 | 0.000000000286750672  |
| 0.00001745349 | 0.00003469027 | 0.003256248134 | 0.0000000002427780459 | 0.0000000002865863058 | 0.005146924332 | 0.0000000002868885329 |
| 0.00001747016 | 0.00003474028 | 0.003259358209 | 0.0000000002430099256 | 0.0000000002868600272 | 0.005154344214 | 0.0000000002873021156 |
| 0.00001748683 | 0.00003477362 | 0.003262468284 | 0.0000000002432418053 | 0.0000000002871337486 | 0.005159290801 | 0.0000000002875778374 |
| 0.0000175035  | 0.00003480696 | 0.003265578358 | 0.000000000243473685  | 0.00000000028740747   | 0.005164237389 | 0.0000000002878535592 |
| 0.00001752017 | 0.0000348403  | 0.003268688433 | 0.0000000002437055647 | 0.0000000002876811914 | 0.005169183976 | 0.000000000288129281  |
| 0.00001753684 | 0.00003489031 | 0.003271798507 | 0.0000000002439374444 | 0.0000000002879549128 | 0.005176603858 | 0.0000000002885428637 |
| 0.00001755351 | 0.00003492365 | 0.003274908582 | 0.0000000002441693241 | 0.0000000002882286342 | 0.005181550445 | 0.0000000002888185855 |
| 0.00001757018 | 0.00003495699 | 0.003278018657 | 0.0000000002444012038 | 0.0000000002885023556 | 0.005186497033 | 0.0000000002890943073 |
| 0.00001758685 | 0.00003499033 | 0.003281128731 | 0.0000000002446330835 | 0.000000000288776077  | 0.00519144362  | 0.0000000002893700291 |
| 0.00001760352 | 0.0000352337  | 0.003284238806 | 0.0000000002448649632 | 0.0000000002890497984 | 0.004973793769 | 0.0000000002772382699 |
| 0.00001762019 | 0.0000355671  | 0.003287348881 | 0.0000000002450968429 | 0.0000000002893235198 | 0.004978740356 | 0.0000000002775139917 |
| 0.00001763686 | 0.0000356072  | 0.003290458955 | 0.0000000002453287226 | 0.0000000002895972412 | 0.004986160237 | 0.0000000002779275744 |
| 0.00001765353 | 0.0000356573  | 0.00329356903  | 0.0000000002455606023 | 0.0000000002898709626 | 0.004993580119 | 0.0000000002783411571 |
| 0.0000176702  | 0.0000356907  | 0.003296679104 | 0.000000000245792482  | 0.000000000290144684  | 0.004998526706 | 0.0000000002786168789 |
| 0.00001768687 | 0.00003575675 | 0.003299789179 | 0.0000000002460243617 | 0.0000000002904184054 | 0.005008419881 | 0.0000000002791683225 |
| 0.00001770354 | 0.00003580676 | 0.003302899254 | 0.0000000002462562414 | 0.0000000002906921268 | 0.005015839763 | 0.0000000002795819052 |
| 0.00001772021 | 0.00003585677 | 0.003306009328 | 0.0000000002464881211 | 0.0000000002909658482 | 0.005023259644 | 0.0000000002799954879 |
| 0.00001773688 | 0.00003594012 | 0.003309119403 | 0.0000000002467200008 | 0.0000000002912395696 | 0.005035626113 | 0.0000000002806847924 |
| 0.00001775355 | 0.00003599011 | 0.003312229478 | 0.0000000002469518805 | 0.000000000291513291  | 0.005028206231 | 0.0000000002802712097 |
| 0.00001777022 | 0.00003595679 | 0.003315339552 | 0.0000000002471837602 | 0.0000000002917870124 | 0.005038099407 | 0.0000000002808226533 |
| 0.00001778689 | 0.00003407348 | 0.003318449627 | 0.0000000002474156399 | 0.0000000002920607338 | 0.005055412463 | 0.0000000002817876796 |
| 0.00001780356 | 0.00003414016 | 0.003321559701 | 0.0000000002476475196 | 0.0000000002923344552 | 0.005065305638 | 0.0000000002823391232 |
| 0.00001782023 | 0.00003422351 | 0.003324669776 | 0.0000000002478793993 | 0.0000000002926081766 | 0.005077672107 | 0.0000000002830284277 |
| 0.0000178369  | 0.00003429019 | 0.003327779851 | 0.000000000248111279  | 0.000000000292881898  | 0.005087565282 | 0.0000000002835798713 |
| 0.00001785357 | 0.00003432353 | 0.003330889925 | 0.0000000002483431587 | 0.0000000002931556194 | 0.005092511869 | 0.0000000002838555931 |
| 0.00001787024 | 0.00003440688 | 0.003334       | 0.0000000002485750384 | 0.0000000002934293408 | 0.005104878338 | 0.0000000002845448976 |
| 0.00001788691 | 0.00003437354 | 0.003337110075 | 0.0000000002488069181 | 0.0000000002937030622 | 0.005099931751 | 0.0000000002842691758 |
| 0.00001790358 | 0.00003439021 | 0.003340220149 | 0.0000000002490387978 | 0.0000000002939767836 | 0.005102405045 | 0.0000000002844070367 |
| 0.00001792025 | 0.00003454024 | 0.003343330224 | 0.0000000002492706775 | 0.000000000294250505  | 0.005124664688 | 0.0000000002856477848 |
| 0.00001793692 | 0.00003449023 | 0.003346440299 | 0.0000000002495025572 | 0.0000000002945242264 | 0.005117244807 | 0.0000000002852342021 |
| 0.00001795359 | 0.00003444022 | 0.003349550373 | 0.0000000002497344369 | 0.0000000002947979478 | 0.005109824926 | 0.0000000002848206194 |
| 0.00001797026 | 0.00003455691 | 0.003352660448 | 0.0000000002499663166 | 0.0000000002950716692 | 0.005127137982 | 0.0000000002857856457 |
| 0.00001798693 | 0.00003459025 | 0.003355770522 | 0.0000000002501981963 | 0.0000000002953453906 | 0.00513208457  | 0.0000000002860613675 |
| 0.0000180036  | 0.00003445689 | 0.003358880597 | 0.000000000250430076  | 0.000000000295619112  | 0.00511229822  | 0.0000000002849584803 |

|               |               |                |                       |                       |                |                       |
|---------------|---------------|----------------|-----------------------|-----------------------|----------------|-----------------------|
| 0.00001802027 | 0.0000345069  | 0.003361990672 | 0.0000000002506619557 | 0.0000000002958928334 | 0.005119718101 | 0.000000000285372063  |
| 0.00001803694 | 0.00003452357 | 0.003365100746 | 0.0000000002508938354 | 0.0000000002961665548 | 0.005122191395 | 0.0000000002855099239 |
| 0.00001805361 | 0.00003447356 | 0.003368210821 | 0.0000000002511257151 | 0.0000000002964402762 | 0.005114771513 | 0.0000000002850963412 |
| 0.00001807028 | 0.00003460692 | 0.003371320896 | 0.0000000002513575948 | 0.0000000002967139976 | 0.005134557864 | 0.0000000002861992284 |
| 0.00001808695 | 0.00003457358 | 0.00337443097  | 0.0000000002515894745 | 0.000000000296987719  | 0.005129611276 | 0.0000000002859235066 |
| 0.00001810362 | 0.00003442355 | 0.003377541045 | 0.0000000002518213542 | 0.0000000002972614404 | 0.005107351632 | 0.0000000002846827585 |
| 0.00001812029 | 0.00003462359 | 0.003380651119 | 0.0000000002520532339 | 0.0000000002975351618 | 0.005137031157 | 0.0000000002863370893 |
| 0.00001813696 | 0.00003449023 | 0.003383761194 | 0.0000000002522851136 | 0.0000000002978088832 | 0.005117244807 | 0.0000000002852342021 |
| 0.00001815363 | 0.00003464026 | 0.003386871269 | 0.0000000002525169933 | 0.0000000002980826046 | 0.005139504451 | 0.0000000002864749502 |
| 0.0000181703  | 0.00003465693 | 0.003389981343 | 0.000000000252748873  | 0.000000000298356326  | 0.005141977745 | 0.0000000002866128111 |
| 0.00001818697 | 0.00003469027 | 0.003393091418 | 0.0000000002529807527 | 0.0000000002986300474 | 0.005146924332 | 0.0000000002868885329 |
| 0.00001820364 | 0.0000346736  | 0.003396201493 | 0.0000000002532126324 | 0.0000000002989037688 | 0.005144451039 | 0.000000000286750672  |
| 0.00001822031 | 0.00003477362 | 0.003399311567 | 0.0000000002534445121 | 0.0000000002991774902 | 0.005159290801 | 0.0000000002875778374 |
| 0.00001823698 | 0.00003472361 | 0.003402421642 | 0.0000000002536763918 | 0.0000000002994512116 | 0.00515187092  | 0.0000000002871642547 |
| 0.00001825365 | 0.00003470694 | 0.003405531716 | 0.0000000002539082715 | 0.000000000299724933  | 0.005149397626 | 0.0000000002870263938 |
| 0.00001827032 | 0.00003479029 | 0.003408641791 | 0.0000000002541401512 | 0.0000000002999986544 | 0.005161764095 | 0.0000000002877156983 |
| 0.00001828699 | 0.00003485697 | 0.003411751866 | 0.0000000002543720309 | 0.0000000003002723758 | 0.00517165727  | 0.0000000002882671419 |
| 0.00001830366 | 0.00003482363 | 0.00341486194  | 0.0000000002546039106 | 0.0000000003005460972 | 0.005166710682 | 0.0000000002879914201 |
| 0.00001832033 | 0.00003474028 | 0.003417972015 | 0.0000000002548357903 | 0.0000000003008198186 | 0.005154344214 | 0.0000000002873021156 |
| 0.000018337   | 0.00003490698 | 0.00342108209  | 0.00000000025506767   | 0.00000000030109354   | 0.005179077151 | 0.0000000002886807246 |
| 0.0000185037  | 0.0000348403  | 0.003452182836 | 0.000000000257386467  | 0.000000000303830754  | 0.005169183976 | 0.000000000288129281  |
| 0.0000186704  | 0.0000351737  | 0.003483283582 | 0.000000000259705264  | 0.000000000306567968  | 0.005218649852 | 0.000000000290886499  |
| 0.0000188371  | 0.0000355071  | 0.003514384328 | 0.000000000262024061  | 0.000000000309305182  | 0.005268115727 | 0.000000000293643717  |
| 0.0000190038  | 0.000035007   | 0.003545485075 | 0.000000000264342858  | 0.000000000312042396  | 0.005193916914 | 0.00000000028950789   |
| 0.0000191705  | 0.0000360072  | 0.003576585821 | 0.000000000266661655  | 0.00000000031477961   | 0.00534231454  | 0.000000000297779544  |
| 0.0000193372  | 0.0000353404  | 0.003607686567 | 0.000000000268980452  | 0.000000000317516824  | 0.005243382789 | 0.000000000292265108  |
| 0.0000195039  | 0.0000363406  | 0.003638787313 | 0.000000000271299249  | 0.000000000320254038  | 0.005391780415 | 0.000000000300536762  |
| 0.0000196706  | 0.0000365073  | 0.00366988806  | 0.000000000273618046  | 0.000000000322991252  | 0.005416513353 | 0.000000000301915371  |
| 0.0000198373  | 0.0000361739  | 0.003700988806 | 0.000000000275936843  | 0.000000000325728466  | 0.005367047478 | 0.000000000299158153  |
| 0.000020004   | 0.000036674   | 0.003732089552 | 0.00000000027825564   | 0.00000000032846568   | 0.005441246291 | 0.00000000030329398   |
| 0.0000201707  | 0.0000368407  | 0.003763190299 | 0.000000000280574437  | 0.000000000331202894  | 0.005465979228 | 0.000000000304672589  |
| 0.0000203374  | 0.0000371741  | 0.003794291045 | 0.000000000282893234  | 0.000000000333940108  | 0.005515445104 | 0.000000000307429807  |
| 0.0000205041  | 0.0000373408  | 0.003825391791 | 0.000000000285212031  | 0.000000000336677322  | 0.005540178042 | 0.000000000308808416  |
| 0.0000206708  | 0.0000375075  | 0.003856492537 | 0.000000000287530828  | 0.000000000339414536  | 0.005564910979 | 0.000000000310187025  |
| 0.0000208375  | 0.0000380076  | 0.003887593284 | 0.000000000289849625  | 0.00000000034215175   | 0.005639109792 | 0.000000000314322852  |
| 0.0000210042  | 0.0000378409  | 0.00391869403  | 0.000000000292168422  | 0.000000000344888964  | 0.005614376855 | 0.000000000312944243  |
| 0.0000211709  | 0.0000385077  | 0.003949794776 | 0.000000000294487219  | 0.000000000347626178  | 0.005713308605 | 0.000000000318458679  |
| 0.0000213376  | 0.0000381743  | 0.003980895522 | 0.000000000296806016  | 0.000000000350363392  | 0.00566384273  | 0.000000000315701461  |
| 0.0000215043  | 0.000038341   | 0.004011996269 | 0.000000000299124813  | 0.000000000353100606  | 0.005688575668 | 0.00000000031708007   |
| 0.000021671   | 0.0000393412  | 0.004043097015 | 0.00000000030144361   | 0.00000000035583782   | 0.005836973294 | 0.000000000325351724  |

|              |              |                |                      |                      |                |                      |
|--------------|--------------|----------------|----------------------|----------------------|----------------|----------------------|
| 0.0000218377 | 0.0000395079 | 0.004074197761 | 0.000000000303762407 | 0.000000000358575034 | 0.005861706231 | 0.000000000326730333 |
| 0.0000220044 | 0.0000396746 | 0.004105298507 | 0.000000000306081204 | 0.000000000361312248 | 0.005886439169 | 0.000000000328108942 |
| 0.0000223378 | 0.0000401747 | 0.0041675      | 0.000000000310718798 | 0.000000000366786676 | 0.005960637982 | 0.000000000332244769 |
| 0.0000225045 | 0.0000406748 | 0.004198600746 | 0.000000000313037595 | 0.00000000036952389  | 0.006034836795 | 0.000000000336380596 |
| 0.0000226712 | 0.000040008  | 0.004229701493 | 0.000000000315356392 | 0.000000000372261104 | 0.005935905045 | 0.00000000033086616  |
| 0.0000228379 | 0.0000398413 | 0.004260802239 | 0.000000000317675189 | 0.000000000374998318 | 0.005911172107 | 0.000000000329487551 |
| 0.0000230046 | 0.0000411749 | 0.004291902985 | 0.000000000319993986 | 0.000000000377735532 | 0.006109035608 | 0.000000000340516423 |
| 0.0000231713 | 0.0000408415 | 0.004323003731 | 0.000000000322312783 | 0.000000000380472746 | 0.006059569733 | 0.000000000337759205 |
| 0.000023338  | 0.0000415083 | 0.004354104478 | 0.00000000032463158  | 0.00000000038320996  | 0.006158501484 | 0.000000000343273641 |
| 0.0000235047 | 0.0000418417 | 0.004385205224 | 0.000000000326950377 | 0.000000000385947174 | 0.006207967359 | 0.000000000346030859 |
| 0.0000236714 | 0.0000421751 | 0.00441630597  | 0.000000000329269174 | 0.000000000388684388 | 0.006257433234 | 0.000000000348788077 |
| 0.0000238381 | 0.0000431753 | 0.004447406716 | 0.000000000331587971 | 0.000000000391421602 | 0.006405830861 | 0.000000000357059731 |
| 0.0000240048 | 0.000041675  | 0.004478507463 | 0.000000000333906768 | 0.000000000394158816 | 0.006183234421 | 0.00000000034465225  |
| 0.0000241715 | 0.0000425085 | 0.004509608209 | 0.000000000336225565 | 0.00000000039689603  | 0.00630689911  | 0.000000000351545295 |
| 0.0000243382 | 0.0000440088 | 0.004540708955 | 0.000000000338544362 | 0.000000000399633244 | 0.006529495549 | 0.000000000363952776 |
| 0.0000245049 | 0.0000446756 | 0.004571809701 | 0.000000000340863159 | 0.000000000402370458 | 0.0066284273   | 0.000000000369467212 |
| 0.0000246716 | 0.0000441755 | 0.004602910448 | 0.000000000343181956 | 0.000000000405107672 | 0.006554228487 | 0.000000000365331385 |
| 0.0000248383 | 0.0000451757 | 0.004634011194 | 0.000000000345500753 | 0.000000000407844886 | 0.006702626113 | 0.000000000373603039 |
| 0.000025005  | 0.0000456758 | 0.00466511194  | 0.00000000034781955  | 0.0000000004105821   | 0.006776824926 | 0.000000000377738866 |
| 0.0000251717 | 0.0000461759 | 0.004696212687 | 0.000000000350138347 | 0.000000000413319314 | 0.006851023739 | 0.000000000381874693 |
| 0.0000253384 | 0.0000465093 | 0.004727313433 | 0.000000000352457144 | 0.000000000416056528 | 0.006900489614 | 0.000000000384631911 |
| 0.0000255051 | 0.0000471761 | 0.004758414179 | 0.000000000354775941 | 0.000000000418793742 | 0.006999421365 | 0.000000000390146347 |
| 0.0000256718 | 0.0000468427 | 0.004789514925 | 0.000000000357094738 | 0.000000000421530956 | 0.00694995549  | 0.000000000387389129 |
| 0.0000258385 | 0.0000476762 | 0.004820615672 | 0.000000000359413535 | 0.00000000042426817  | 0.007073620178 | 0.000000000394282174 |
| 0.0000260052 | 0.0000481763 | 0.004851716418 | 0.000000000361732332 | 0.000000000427005384 | 0.007147818991 | 0.000000000398418001 |
| 0.0000261719 | 0.0000490098 | 0.004882817164 | 0.000000000364051129 | 0.000000000429742598 | 0.00727148368  | 0.000000000405311046 |
| 0.0000263386 | 0.0000485097 | 0.00491391791  | 0.000000000366369926 | 0.000000000432479812 | 0.007197284866 | 0.000000000401175219 |
| 0.0000265053 | 0.0000495099 | 0.004945018657 | 0.000000000368688723 | 0.000000000435217026 | 0.007345682493 | 0.000000000409446873 |
| 0.000026672  | 0.0000498433 | 0.004976119403 | 0.00000000037100752  | 0.00000000043795424  | 0.007395148368 | 0.000000000412204091 |
| 0.0000268387 | 0.0000491765 | 0.005007220149 | 0.000000000373326317 | 0.000000000440691454 | 0.007296216617 | 0.000000000406689655 |
| 0.0000270054 | 0.0000501767 | 0.005038320896 | 0.000000000375645114 | 0.000000000443428668 | 0.007444614243 | 0.000000000414961309 |
| 0.0000271721 | 0.0000508435 | 0.005069421642 | 0.000000000377963911 | 0.000000000446165882 | 0.007543545994 | 0.000000000420475745 |
| 0.0000273388 | 0.0000505101 | 0.005100522388 | 0.000000000380282708 | 0.000000000448903096 | 0.007494080119 | 0.000000000417718527 |
| 0.0000275055 | 0.0000506768 | 0.005131623134 | 0.000000000382601505 | 0.00000000045164031  | 0.007518813056 | 0.000000000419097136 |
| 0.0000276722 | 0.0000515103 | 0.005162723881 | 0.000000000384920302 | 0.000000000454377524 | 0.007642477745 | 0.000000000425990181 |
| 0.0000278389 | 0.0000511769 | 0.005193824627 | 0.000000000387239099 | 0.000000000457114738 | 0.007593011869 | 0.000000000423232963 |
| 0.0000280056 | 0.0000520104 | 0.005224925373 | 0.000000000389557896 | 0.000000000459851952 | 0.007716676558 | 0.000000000430126008 |
| 0.0000281723 | 0.0000518437 | 0.005256026119 | 0.000000000391876693 | 0.000000000462589166 | 0.00769194362  | 0.000000000428747399 |
| 0.000028339  | 0.0000528439 | 0.005287126866 | 0.00000000039419549  | 0.00000000046532638  | 0.007840341246 | 0.000000000437019053 |
| 0.0000285057 | 0.0000525105 | 0.005318227612 | 0.000000000396514287 | 0.000000000468063594 | 0.007790875371 | 0.000000000434261835 |

|              |              |                |                      |                       |                |                      |
|--------------|--------------|----------------|----------------------|-----------------------|----------------|----------------------|
| 0.0000286724 | 0.0000531773 | 0.005349328358 | 0.000000000398833084 | 0.000000000470800808  | 0.007889807122 | 0.000000000439776271 |
| 0.0000288391 | 0.0000526772 | 0.005380429104 | 0.000000000401151881 | 0.000000000473538022  | 0.007815608309 | 0.000000000435640444 |
| 0.0000290058 | 0.0000540108 | 0.005411529851 | 0.000000000403470678 | 0.000000000476275236  | 0.00801347181  | 0.000000000446669316 |
| 0.0000291725 | 0.0000545109 | 0.005442630597 | 0.000000000405789475 | 0.00000000047901245   | 0.008087670623 | 0.000000000450805143 |
| 0.0000293392 | 0.0000535107 | 0.005473731343 | 0.000000000408108272 | 0.000000000481749664  | 0.007939272997 | 0.000000000442533489 |
| 0.0000295059 | 0.0000551777 | 0.00550483209  | 0.000000000410427069 | 0.0000000004844486878 | 0.008186602374 | 0.000000000456319579 |
| 0.0000296726 | 0.0000548443 | 0.005535932836 | 0.000000000412745866 | 0.000000000487224092  | 0.008137136499 | 0.000000000453562361 |
| 0.0000298393 | 0.0000546776 | 0.005567033582 | 0.000000000415064663 | 0.000000000489961306  | 0.008112403561 | 0.000000000452183752 |
| 0.000030006  | 0.0000555111 | 0.005598134328 | 0.00000000041738346  | 0.00000000049269852   | 0.008236068249 | 0.000000000459076797 |
| 0.0000301727 | 0.0000561779 | 0.005629235075 | 0.000000000419702257 | 0.000000000495435734  | 0.008335       | 0.000000000464591233 |
| 0.0000303394 | 0.0000558445 | 0.005660335821 | 0.000000000422021054 | 0.000000000498172948  | 0.008285534125 | 0.000000000461834015 |
| 0.0000305061 | 0.000056678  | 0.005691436567 | 0.000000000424339851 | 0.000000000500910162  | 0.008409198813 | 0.00000000046872706  |
| 0.0000306728 | 0.0000565113 | 0.005722537313 | 0.000000000426658648 | 0.000000000503647376  | 0.008384465875 | 0.000000000467348451 |
| 0.0000308395 | 0.0000575115 | 0.00575363806  | 0.000000000428977445 | 0.00000000050638459   | 0.008532863501 | 0.000000000475620105 |
| 0.0000310062 | 0.0000571781 | 0.005784738806 | 0.000000000431296242 | 0.000000000509121804  | 0.008483397626 | 0.000000000472862887 |
| 0.0000311729 | 0.0000578449 | 0.005815839552 | 0.000000000433615039 | 0.000000000511859018  | 0.008582329377 | 0.000000000478377323 |
| 0.0000313396 | 0.0000585117 | 0.005846940299 | 0.000000000435933836 | 0.000000000514596232  | 0.008681261128 | 0.000000000483891759 |
| 0.0000315063 | 0.0000576782 | 0.005878041045 | 0.000000000438252633 | 0.000000000517333446  | 0.008557596439 | 0.000000000476998714 |
| 0.000031673  | 0.0000580116 | 0.005909141791 | 0.00000000044057143  | 0.00000000052007066   | 0.008607062315 | 0.000000000479755932 |
| 0.0000318397 | 0.0000593452 | 0.005940242537 | 0.000000000442890227 | 0.000000000522807874  | 0.008804925816 | 0.000000000490784804 |
| 0.0000320064 | 0.0000598453 | 0.005971343284 | 0.000000000445209024 | 0.000000000525545088  | 0.008879124629 | 0.000000000494920631 |
| 0.0000321731 | 0.0000608455 | 0.00600244403  | 0.000000000447527821 | 0.000000000528282302  | 0.009027522255 | 0.000000000503192285 |
| 0.0000323398 | 0.0000603454 | 0.006033544776 | 0.000000000449846618 | 0.000000000531019516  | 0.008953323442 | 0.000000000499056458 |
| 0.0000325065 | 0.0000613456 | 0.006064645522 | 0.000000000452165415 | 0.00000000053375673   | 0.009101721068 | 0.000000000507328112 |
| 0.0000326732 | 0.000061679  | 0.006095746269 | 0.000000000454484212 | 0.000000000536493944  | 0.009151186944 | 0.00000000051008533  |
| 0.0000328399 | 0.0000605121 | 0.006126847015 | 0.000000000456803009 | 0.000000000539231158  | 0.00897805638  | 0.000000000500435067 |
| 0.0000330066 | 0.0000621791 | 0.006157947761 | 0.000000000459121806 | 0.000000000541968372  | 0.009225385757 | 0.000000000514221157 |
| 0.0000331733 | 0.0000618457 | 0.006189048507 | 0.000000000461440603 | 0.000000000544705586  | 0.009175919881 | 0.000000000511463939 |
| 0.00003334   | 0.0000623458 | 0.006220149254 | 0.0000000004637594   | 0.0000000005474428    | 0.009250118694 | 0.000000000515599766 |
| 0.0000335067 | 0.0000626792 | 0.00625125     | 0.000000000466078197 | 0.000000000550180014  | 0.00929958457  | 0.000000000518356984 |
| 0.0000336734 | 0.0000625125 | 0.006282350746 | 0.000000000468396994 | 0.000000000552917228  | 0.009274851632 | 0.000000000516978375 |
| 0.0000338401 | 0.0000635127 | 0.006313451493 | 0.000000000470715791 | 0.000000000555654442  | 0.009423249258 | 0.000000000525250029 |
| 0.0000340068 | 0.0000631793 | 0.006344552239 | 0.000000000473034588 | 0.000000000558391656  | 0.009373783383 | 0.000000000522492811 |
| 0.0000341735 | 0.0000638461 | 0.006375652985 | 0.000000000475353385 | 0.00000000056112887   | 0.009472715134 | 0.000000000528007247 |
| 0.0000343402 | 0.0000646796 | 0.006406753731 | 0.000000000477672182 | 0.000000000563866084  | 0.009596379822 | 0.000000000534900292 |
| 0.0000345069 | 0.0000651797 | 0.006437854478 | 0.000000000479990979 | 0.000000000566603298  | 0.009670578635 | 0.000000000539036119 |
| 0.0000346736 | 0.0000643462 | 0.006468955224 | 0.000000000482309776 | 0.000000000569340512  | 0.009546913947 | 0.000000000532143074 |
| 0.0000348403 | 0.0000655131 | 0.00650005597  | 0.000000000484628573 | 0.000000000572077726  | 0.00972004451  | 0.000000000541793337 |
| 0.000035007  | 0.0000661799 | 0.006531156716 | 0.00000000048694737  | 0.00000000057481494   | 0.009818976261 | 0.000000000547307773 |
| 0.0000351737 | 0.0000658465 | 0.006562257463 | 0.000000000489266167 | 0.000000000577552154  | 0.009769510386 | 0.000000000544550555 |

|                 |                  |                    |                      |                      |                    |                      |
|-----------------|------------------|--------------------|----------------------|----------------------|--------------------|----------------------|
| 0.0000353404    | 0.0000663466     | 0.006593358209     | 0.000000000491584964 | 0.000000000580289368 | 0.009843709199     | 0.000000000548686382 |
| 0.0000355071    | 0.0000668467     | 0.006624458955     | 0.000000000493903761 | 0.000000000583026582 | 0.009917908012     | 0.000000000552822209 |
| 0.0000356738    | 0.0000665133     | 0.006655559701     | 0.000000000496222558 | 0.000000000585763796 | 0.009868442136     | 0.000000000550064991 |
| 0.0000358405    | 0.0000673468     | 0.006686660448     | 0.000000000498541355 | 0.00000000058850101  | 0.009992106825     | 0.000000000556958036 |
| 0.0000360072    | 0.0000678469     | 0.006717761194     | 0.000000000500860152 | 0.000000000591238224 | 0.01006630564      | 0.000000000561093863 |
| 0.0000361739    | 0.0000681803     | 0.00674886194      | 0.000000000503178949 | 0.000000000593975438 | 0.01011577151      | 0.000000000563851081 |
| 0.0000363406    | 0.0000676802     | 0.006779962687     | 0.000000000505497746 | 0.000000000596712652 | 0.0100415727       | 0.000000000559715254 |
| 0.0000365073    | 0.0000688471     | 0.006811063433     | 0.000000000507816543 | 0.000000000599449866 | 0.01021470326      | 0.000000000569365517 |
| 0.000036674     | 0.0000695139     | 0.006842164179     | 0.00000000051013534  | 0.00000000060218708  | 0.01031363501      | 0.000000000574879953 |
| 0.000000001667  | 0.0000000030006  | 0.0000003110074627 | 0                    | 0                    | 0.0000004451928783 | 0                    |
| 0.0000000016503 | 0.00000000278389 | 0.0000003078973881 | 0                    | 0                    | 0.0000004130400593 | 0                    |
| 0.0000000016336 | 0.00000000301727 | 0.0000003047873134 | 0                    | 0                    | 0.0000004476661721 | 0                    |
| 0.0000000016169 | 0.00000000315063 | 0.0000003016772388 | 0                    | 0                    | 0.0000004674525223 | 0                    |
| 0.0000000016003 | 0.00000000296726 | 0.0000002985671642 | 0                    | 0                    | 0.0000004402462908 | 0                    |
| 0.0000000015836 | 0.0000000028339  | 0.0000002954570896 | 0                    | 0                    | 0.0000004204599407 | 0                    |
| 0.0000000015669 | 0.00000000293392 | 0.0000002923470149 | 0                    | 0                    | 0.0000004352997033 | 0                    |
| 0.0000000015503 | 0.00000000276722 | 0.0000002892369403 | 0                    | 0                    | 0.0000004105667656 | 0                    |
| 0.0000000015336 | 0.00000000298393 | 0.0000002861268657 | 0                    | 0                    | 0.0000004427195846 | 0                    |
| 0.0000000015169 | 0.00000000270054 | 0.000000283016791  | 0                    | 0                    | 0.0000004006735905 | 0                    |
| 0.0000000015003 | 0.00000000261719 | 0.0000002799067164 | 0                    | 0                    | 0.0000003883071217 | 0                    |
| 0.0000000014836 | 0.00000000255051 | 0.0000002767966418 | 0                    | 0                    | 0.0000003784139466 | 0                    |
| 0.0000000014669 | 0.00000000288391 | 0.0000002736865672 | 0                    | 0                    | 0.000000427879822  | 0                    |
| 0.0000000014502 | 0.00000000241715 | 0.0000002705764925 | 0                    | 0                    | 0.0000003586275964 | 0                    |
| 0.0000000014336 | 0.00000000225045 | 0.0000002674664179 | 0                    | 0                    | 0.0000003338946588 | 0                    |
| 0.0000000014169 | 0.00000000218377 | 0.0000002643563433 | 0                    | 0                    | 0.0000003240014837 | 0                    |
| 0.0000000014002 | 0.00000000255051 | 0.0000002612462687 | 0                    | 0                    | 0.0000003784139466 | 0                    |
| 0.0000000013836 | 0.0000000026672  | 0.000000258136194  | 0                    | 0                    | 0.000000395727003  | 0                    |
| 0.0000000013669 | 0.00000000238381 | 0.0000002550261194 | 0                    | 0                    | 0.0000003536810089 | 0                    |
| 0.0000000013502 | 0.00000000210042 | 0.0000002519160448 | 0                    | 0                    | 0.0000003116350148 | 0                    |
| 0.0000000013336 | 0.00000000226712 | 0.0000002488059701 | 0                    | 0                    | 0.0000003363679525 | 0                    |
| 0.0000000013169 | 0.00000000240048 | 0.0000002456958955 | 0                    | 0                    | 0.0000003561543027 | 0                    |
| 0.0000000013002 | 0.00000000206708 | 0.0000002425858209 | 0                    | 0                    | 0.0000003066884273 | 0                    |
| 0.0000000012835 | 0.00000000301727 | 0.0000002394757463 | 0                    | 0                    | 0.0000004476661721 | 0                    |
| 0.0000000012669 | 0.00000000185037 | 0.0000002363656716 | 0                    | 0                    | 0.0000002745356083 | 0                    |
| 0.0000000012502 | 0.000000001667   | 0.000000233255597  | 0                    | 0                    | 0.0000002473293769 | 0                    |
| 0.0000000012335 | 0.00000000230046 | 0.0000002301455224 | 0                    | 0                    | 0.0000003413145401 | 0                    |
| 0.0000000012169 | 0.00000000168367 | 0.0000002270354478 | 0                    | 0                    | 0.0000002498026706 | 0                    |
| 0.0000000012002 | 0.00000000203374 | 0.0000002239253731 | 0                    | 0                    | 0.0000003017418398 | 0                    |
| 0.0000000011835 | 0.00000000151697 | 0.0000002208152985 | 0                    | 0                    | 0.0000002250697329 | 0                    |
| 0.0000000011669 | 0.00000000135027 | 0.0000002177052239 | 0                    | 0                    | 0.0000002003367953 | 0                    |

|                |                 |                    |   |   |                   |   |
|----------------|-----------------|--------------------|---|---|-------------------|---|
| 0.000000011502 | 0.0000000145029 | 0.000002145951493  | 0 | 0 | 0.000002151765579 | 0 |
| 0.000000011335 | 0.0000000165033 | 0.000002114850746  | 0 | 0 | 0.000002448560831 | 0 |
| 0.000000011168 | 0.0000000128359 | 0.00000208375      | 0 | 0 | 0.000001904436202 | 0 |
| 0.000000011002 | 0.0000000123358 | 0.000002052649254  | 0 | 0 | 0.000001830237389 | 0 |
| 0.000000010835 | 0.0000000158365 | 0.000002021548507  | 0 | 0 | 0.00000234962908  | 0 |
| 0.000000010668 | 0.0000000155031 | 0.000001990447761  | 0 | 0 | 0.000002300163205 | 0 |
| 0.000000010502 | 0.0000000148363 | 0.000001959347015  | 0 | 0 | 0.000002201231454 | 0 |
| 0.000000010335 | 0.000000020004  | 0.000001928246269  | 0 | 0 | 0.000002967952522 | 0 |
| 0.000000010168 | 0.000000026672  | 0.000001897145522  | 0 | 0 | 0.00000395727003  | 0 |
| 0.000000010002 | 0.0000000138361 | 0.000001866044776  | 0 | 0 | 0.000002052833828 | 0 |
| 0.000000009835 | 0.0000000143362 | 0.00000183494403   | 0 | 0 | 0.000002127032641 | 0 |
| 0.000000009668 | 0.000000011669  | 0.000001803843284  | 0 | 0 | 0.000001731305638 | 0 |
| 0.000000009501 | 0.0000000161699 | 0.000001772742537  | 0 | 0 | 0.000002399094955 | 0 |
| 0.000000009335 | 0.000000015003  | 0.000001741641791  | 0 | 0 | 0.000002225964392 | 0 |
| 0.000000009168 | 0.0000000131693 | 0.000001710541045  | 0 | 0 | 0.000001953902077 | 0 |
| 0.000000009001 | 0.0000000125025 | 0.000001679440299  | 0 | 0 | 0.000001854970326 | 0 |
| 0.000000008835 | 0.0000000121691 | 0.000001648339552  | 0 | 0 | 0.000001805504451 | 0 |
| 0.000000008668 | 0.0000000118357 | 0.000001617238806  | 0 | 0 | 0.000001756038576 | 0 |
| 0.000000008501 | 0.0000000111689 | 0.00000158613806   | 0 | 0 | 0.000001657106825 | 0 |
| 0.000000008335 | 0.0000000101687 | 0.000001555037313  | 0 | 0 | 0.000001508709199 | 0 |
| 0.000000008168 | 0.0000000085017 | 0.000001523936567  | 0 | 0 | 0.000001261379822 | 0 |
| 0.000000008001 | 0.0000000098353 | 0.000001492835821  | 0 | 0 | 0.000001459243323 | 0 |
| 0.000000007834 | 0.0000000105021 | 0.000001461735075  | 0 | 0 | 0.000001558175074 | 0 |
| 0.000000007668 | 0.000000008335  | 0.000001430634328  | 0 | 0 | 0.000001236646884 | 0 |
| 0.000000007501 | 0.0000000126692 | 0.000001399533582  | 0 | 0 | 0.000001879703264 | 0 |
| 0.000000007334 | 0.0000000135027 | 0.000001368432836  | 0 | 0 | 0.000002003367953 | 0 |
| 0.000000007168 | 0.0000000103354 | 0.00000133733209   | 0 | 0 | 0.000001533442136 | 0 |
| 0.000000007001 | 0.0000000130026 | 0.000001306231343  | 0 | 0 | 0.000001929169139 | 0 |
| 0.000000006834 | 0.0000000126692 | 0.000001275130597  | 0 | 0 | 0.000001879703264 | 0 |
| 0.000000006668 | 0.0000000130026 | 0.000001244029851  | 0 | 0 | 0.000001929169139 | 0 |
| 0.000000006501 | 0.0000000096686 | 0.000001212929104  | 0 | 0 | 0.000001434510386 | 0 |
| 0.000000006334 | 0.0000000110022 | 0.000001181828358  | 0 | 0 | 0.000001632373887 | 0 |
| 0.000000006167 | 0.0000000106688 | 0.000001150727612  | 0 | 0 | 0.000001582908012 | 0 |
| 0.000000006001 | 0.0000000086684 | 0.000001119626866  | 0 | 0 | 0.00000128611276  | 0 |
| 0.000000005834 | 0.0000000091685 | 0.000001088526119  | 0 | 0 | 0.000001360311573 | 0 |
| 0.000000005667 | 0.0000000080016 | 0.000001057425373  | 0 | 0 | 0.000001187181009 | 0 |
| 0.000000005501 | 0.0000000078349 | 0.000001026324627  | 0 | 0 | 0.000001162448071 | 0 |
| 0.000000005334 | 0.0000000081683 | 0.0000009952238806 | 0 | 0 | 0.000001211913947 | 0 |
| 0.000000005167 | 0.0000000073348 | 0.0000009641231343 | 0 | 0 | 0.000001088249258 | 0 |
| 0.000000005001 | 0.0000000088351 | 0.0000009330223881 | 0 | 0 | 0.000001310845697 | 0 |



|                |                  |                    |   |   |                     |   |
|----------------|------------------|--------------------|---|---|---------------------|---|
| 0.000000004834 | 0.0000000060012  | 0.0000009019216418 | 0 | 0 | 0.0000008903857567  | 0 |
| 0.000000004667 | 0.0000000068347  | 0.0000008708208955 | 0 | 0 | 0.000001014050445   | 0 |
| 0.000000004500 | 0.000000005001   | 0.0000008397201493 | 0 | 0 | 0.0000007419881306  | 0 |
| 0.000000004334 | 0.0000000065013  | 0.000000808619403  | 0 | 0 | 0.0000009645845697  | 0 |
| 0.000000004167 | 0.0000000053344  | 0.0000007775186567 | 0 | 0 | 0.0000007914540059  | 0 |
| 0.000000004000 | 0.0000000043342  | 0.0000007464179104 | 0 | 0 | 0.0000006430563798  | 0 |
| 0.000000003834 | 0.0000000075015  | 0.0000007153171642 | 0 | 0 | 0.000001112982196   | 0 |
| 0.000000003667 | 0.0000000051677  | 0.0000006842164179 | 0 | 0 | 0.0000007667210682  | 0 |
| 0.000000003500 | 0.0000000058345  | 0.0000006531156716 | 0 | 0 | 0.000000865652819   | 0 |
| 0.000000003334 | 0.0000000038341  | 0.0000006220149254 | 0 | 0 | 0.0000005688575668  | 0 |
| 0.000000003167 | 0.0000000055011  | 0.0000005909141791 | 0 | 0 | 0.0000008161869436  | 0 |
| 0.000000003000 | 0.0000000036674  | 0.0000005598134328 | 0 | 0 | 0.0000005441246291  | 0 |
| 0.000000002833 | 0.0000000031673  | 0.0000005287126866 | 0 | 0 | 0.000000469925816   | 0 |
| 0.000000002667 | 0.0000000035007  | 0.0000004976119403 | 0 | 0 | 0.0000005193916914  | 0 |
| 0.000000002500 | 0.0000000028339  | 0.000000466511194  | 0 | 0 | 0.0000004204599407  | 0 |
| 0.000000002333 | 0.0000000045009  | 0.0000004354104478 | 0 | 0 | 0.0000006677893175  | 0 |
| 0.000000002167 | 0.0000000025005  | 0.0000004043097015 | 0 | 0 | 0.0000003709940653  | 0 |
| 0.000000002000 | 0.0000000030006  | 0.0000003732089552 | 0 | 0 | 0.0000004451928783  | 0 |
| 0.000000001833 | 0.000000003334   | 0.000000342108209  | 0 | 0 | 0.0000004946587537  | 0 |
| 0.00000000166  | 0.0000000026672  | 0.0000003110074627 | 0 | 0 | 0.000000395727003   | 0 |
| 0.000000001650 | 0.00000000230046 | 0.0000003078973881 | 0 | 0 | 0.0000003413145401  | 0 |
| 0.000000001633 | 0.00000000291725 | 0.0000003047873134 | 0 | 0 | 0.0000004328264095  | 0 |
| 0.000000001616 | 0.00000000188371 | 0.0000003016772388 | 0 | 0 | 0.0000002794821958  | 0 |
| 0.000000001600 | 0.00000000276722 | 0.0000002985671642 | 0 | 0 | 0.0000004105667656  | 0 |
| 0.000000001583 | 0.00000000303394 | 0.0000002954570896 | 0 | 0 | 0.0000004501394659  | 0 |
| 0.000000001566 | 0.0000000015003  | 0.0000002923470149 | 0 | 0 | 0.0000002225964392  | 0 |
| 0.000000001550 | 0.00000000290058 | 0.0000002892369403 | 0 | 0 | 0.0000004303531157  | 0 |
| 0.000000001533 | 0.00000000123358 | 0.0000002861268657 | 0 | 0 | 0.0000001830237389  | 0 |
| 0.000000001516 | 0.00000000138361 | 0.000000283016791  | 0 | 0 | 0.0000002052833828  | 0 |
| 0.000000001500 | 0.00000000021671 | 0.0000002799067164 | 0 | 0 | 0.00000003215281899 | 0 |
| 0.000000001483 | 0.00000000168367 | 0.0000002767966418 | 0 | 0 | 0.0000002498026706  | 0 |
| 0.000000001466 | 0.00000000096686 | 0.0000002736865672 | 0 | 0 | 0.0000001434510386  | 0 |
| 0.000000001450 | 0.00000000240048 | 0.0000002705764925 | 0 | 0 | 0.0000003561543027  | 0 |
| 0.000000001433 | 0.00000000258385 | 0.0000002674664179 | 0 | 0 | 0.0000003833605341  | 0 |
| 0.000000001416 | 0.00000000196706 | 0.0000002643563433 | 0 | 0 | 0.0000002918486647  | 0 |
| 0.000000001400 | 0.00000000221711 | 0.0000002612462687 | 0 | 0 | 0.0000003289480712  | 0 |
| 0.000000001383 | 0.00000000228379 | 0.000000258136194  | 0 | 0 | 0.0000003388412463  | 0 |
| 0.000000001366 | 0.00000000205041 | 0.0000002550261194 | 0 | 0 | 0.0000003042151335  | 0 |
| 0.000000001350 | 0.00000000251717 | 0.0000002519160448 | 0 | 0 | 0.0000003734673591  | 0 |
| 0.000000001333 | 0.00000000198373 | 0.0000002488059701 | 0 | 0 | 0.0000002943219585  | 0 |

|                |                   |                    |   |   |                     |   |
|----------------|-------------------|--------------------|---|---|---------------------|---|
| 0.000000001316 | 0.00000000238381  | 0.0000002456958955 | 0 | 0 | 0.0000003536810089  | 0 |
| 0.000000001300 | 0.00000000215043  | 0.0000002425858209 | 0 | 0 | 0.0000003190548961  | 0 |
| 0.000000001283 | 0.00000000195039  | 0.0000002394757463 | 0 | 0 | 0.0000002893753709  | 0 |
| 0.000000001266 | 0.00000000248383  | 0.0000002363656716 | 0 | 0 | 0.0000003685207715  | 0 |
| 0.000000001250 | 0.00000000181703  | 0.000000233255597  | 0 | 0 | 0.0000002695890208  | 0 |
| 0.000000001233 | 0.00000000175035  | 0.0000002301455224 | 0 | 0 | 0.0000002596958457  | 0 |
| 0.000000001216 | 0.00000000230046  | 0.0000002270354478 | 0 | 0 | 0.0000003413145401  | 0 |
| 0.000000001200 | 0.00000000173368  | 0.0000002239253731 | 0 | 0 | 0.0000002572225519  | 0 |
| 0.000000001183 | 0.0000000020004   | 0.0000002208152985 | 0 | 0 | 0.0000002967952522  | 0 |
| 0.000000001166 | 0.00000000121691  | 0.0000002177052239 | 0 | 0 | 0.0000001805504451  | 0 |
| 0.000000001150 | 0.00000000156698  | 0.0000002145951493 | 0 | 0 | 0.0000002324896142  | 0 |
| 0.000000001133 | 0.000000001388611 | 0.0000002114850746 | 0 | 0 | 0.0000002060253709  | 0 |
| 0.000000001116 | 0.0000000013336   | 0.000000208375     | 0 | 0 | 0.0000001978635015  | 0 |
| 0.000000001100 | 0.000000001156898 | 0.0000002052649254 | 0 | 0 | 0.0000001716465875  | 0 |
| 0.000000001083 | 0.000000001111889 | 0.0000002021548507 | 0 | 0 | 0.0000001649686944  | 0 |
| 0.000000001066 | 0.000000000926852 | 0.0000001990447761 | 0 | 0 | 0.0000001375151335  | 0 |
| 0.000000001050 | 0.000000000740148 | 0.0000001959347015 | 0 | 0 | 0.0000001098142433  | 0 |
| 0.000000001033 | 0.000000000838501 | 0.0000001928246269 | 0 | 0 | 0.0000001244066766  | 0 |
| 0.000000001016 | 0.000000000670134 | 0.0000001897145522 | 0 | 0 | 0.0000000994264095  | 0 |
| 0.000000001000 | 0.000000000556778 | 0.0000001866044776 | 0 | 0 | 0.00000008260801187 | 0 |
| 0.000000000983 | 0.000000000490098 | 0.000000183494403  | 0 | 0 | 0.0000000727148368  | 0 |
| 0.000000000966 | 0.000000000420084 | 0.0000001803843284 | 0 | 0 | 0.00000006232700297 | 0 |
| 0.000000000950 | 0.000000000636794 | 0.0000001772742537 | 0 | 0 | 0.00000009447982196 | 0 |
| 0.000000000933 | 0.000000000370074 | 0.0000001741641791 | 0 | 0 | 0.00000005490712166 | 0 |
| 0.000000000916 | 0.000000000588451 | 0.0000001710541045 | 0 | 0 | 0.00000008730727003 | 0 |
| 0.000000000900 | 0.000000000323398 | 0.0000001679440299 | 0 | 0 | 0.00000004798189911 | 0 |
| 0.000000000883 | 0.000000000286724 | 0.0000001648339552 | 0 | 0 | 0.00000004254065282 | 0 |
| 0.000000000866 | 0.000000000610122 | 0.0000001617238806 | 0 | 0 | 0.00000009052255193 | 0 |
| 0.000000000850 | 0.000000000703474 | 0.000000158613806  | 0 | 0 | 0.000000104372997   | 0 |
| 0.000000000833 | 0.000000000686804 | 0.0000001555037313 | 0 | 0 | 0.0000001018997033  | 0 |
| 0.000000000816 | 0.00000000030006  | 0.0000001523936567 | 0 | 0 | 0.00000004451928783 | 0 |
| 0.000000000800 | 0.00000000023338  | 0.0000001492835821 | 0 | 0 | 0.00000003462611276 | 0 |
| 0.000000000783 | 0.00000000018337  | 0.0000001461735075 | 0 | 0 | 0.00000002720623145 | 0 |
| 0.000000000766 | 0.000000000273388 | 0.0000001430634328 | 0 | 0 | 0.0000000405620178  | 0 |
| 0.000000000750 | 0.000000000218377 | 0.0000001399533582 | 0 | 0 | 0.00000003240014837 | 0 |
| 0.000000000733 | 0.000000000168367 | 0.0000001368432836 | 0 | 0 | 0.00000002498026706 | 0 |
| 0.000000000716 | 0.000000000203374 | 0.000000133733209  | 0 | 0 | 0.00000003017418398 | 0 |
| 0.000000000700 | 0.000000000206708 | 0.0000001306231343 | 0 | 0 | 0.00000003066884273 | 0 |
| 0.000000000683 | 0.00000000015003  | 0.0000001275130597 | 0 | 0 | 0.00000002225964392 | 0 |
| 0.000000000666 | 0.000000000146696 | 0.0000001244029851 | 0 | 0 | 0.00000002176498516 | 0 |

|                |                   |                      |                      |                      |                       |                      |
|----------------|-------------------|----------------------|----------------------|----------------------|-----------------------|----------------------|
| 0.000000000650 | 0.000000000138361 | 0.0000001212929104   | 0                    | 0                    | 0.00000002052833828   | 0                    |
| 0.000000000633 | 0.000000000123358 | 0.0000001181828358   | 0                    | 0                    | 0.00000001830237389   | 0                    |
| 0.000000000616 | 0                 | 0.0000001150727612   | 0                    | 0                    | 0.00000001261379822   | 0                    |
| 0.000000000600 | 0.000000000106688 | 0.0000001119626866   | 0                    | 0                    | 0.00000001582908012   | 0                    |
| 0.000000000583 | 0                 | 0.0000001088526119   | 0                    | 0                    | 0.000000008161869436  | 0                    |
| 0.000000000566 | 0                 | 0.0000001057425373   | 0                    | 0                    | 0.000000007172551929  | 0                    |
| 0.000000000550 | 0                 | 0.0000001026324627   | 0                    | 0                    | 0.000000003462611276  | 0                    |
| 0.000000000533 | 0                 | 0.00000009952238806  | 0                    | 0                    | 0.000000002225964392  | 0                    |
| 0.000000000516 | 0                 | 0.00000009641231343  | 0                    | 0                    | 0.000000001978635015  | 0                    |
| 0.000000000500 | 0                 | 0.00000009330223881  | 0                    | 0                    | 0.000000001483976261  | 0                    |
| 0.000000000483 | 0                 | 0.00000009019216418  | 0                    | 0                    | 0.000000001731305638  | 0                    |
| 0.000000000466 | 0                 | 0.00000008708208955  | 0                    | 0                    | 0.0000000009893175074 | 0                    |
| 0.000000000450 | 0                 | 0.00000008397201493  | 0                    | 0                    | 0.0000000004946587537 | 0                    |
| 0.000000000433 | 0                 | 0.0000000808619403   | 0                    | 0                    | 0.000000001236646884  | 0                    |
| 0.000000000416 | 0                 | 0.00000007775186567  | 0                    | 0                    | 0.0000000007419881306 | 0                    |
| 0.000000000400 | 0                 | 0.00000007464179104  | 0                    | 0                    | 0.0000000004946587537 | 0                    |
| 0.000000000383 | 0                 | 0.00000007153171642  | 0                    | 0                    | 0.0000000002473293769 | 0                    |
| 0.000000000366 | 0.00000000056678  | 0.00000006842164179  | 0                    | 0                    | 0.00000008409198813   | 0                    |
| 0.000000000350 | 0.00000000061679  | 0.00000006531156716  | 0                    | 0                    | 0.00000009151186944   | 0                    |
| 0.000000000333 | 0.00000000048343  | 0.00000006220149254  | 0                    | 0                    | 0.00000007172551929   | 0                    |
| 0.000000000316 | 0.00000000030006  | 0.00000005909141791  | 0                    | 0                    | 0.00000004451928783   | 0                    |
| 0.000000000300 | 0.00000000053344  | 0.00000005598134328  | 0                    | 0                    | 0.00000007914540059   | 0                    |
| 0.000000000283 | 0.00000000035007  | 0.00000005287126866  | 0                    | 0                    | 0.00000005193916914   | 0                    |
| 0.000000000266 | 0.00000000031673  | 0.00000004976119403  | 0                    | 0                    | 0.0000000469925816    | 0                    |
| 0.000000000250 | 0.00000000020004  | 0.0000000466511194   | 0                    | 0                    | 0.00000002967952522   | 0                    |
| 0.000000000233 | 0.00000000018337  | 0.00000004354104478  | 0                    | 0                    | 0.00000002720623145   | 0                    |
| 0.000000000216 | 0.00000000025005  | 0.00000004043097015  | 0                    | 0                    | 0.00000003709940653   | 0                    |
| 0.000000000200 | 0.00000000013336  | 0.00000003732089552  | 0                    | 0                    | 0.00000001978635015   | 0                    |
| 0.000000000183 | 0.00000000035007  | 0.0000000342108209   | 0                    | 0                    | 0.00000005193916914   | 0                    |
| 0.000000000166 | 0.00000000028339  | 0.00000003110074627  | 0                    | 0                    | 0.00000004204599407   | 0                    |
| 0.000000000150 | 0.00000000026672  | 0.00000002799067164  | 0                    | 0                    | 0.0000000395727003    | 0                    |
| 0.000000000133 | 0.00000000023338  | 0.00000002488059701  | 0                    | 0                    | 0.00000003462611276   | 0                    |
| 0.000000000116 | 0.0000000001667   | 0.00000002177052239  | 0                    | 0                    | 0.00000002473293769   | 0                    |
| 0.000000000100 | 0.00000000011669  | 0.00000001866044776  | 0                    | 0                    | 0.00000001731305638   | 0                    |
| 0              | 0                 | 0.00000001555037313  | 0                    | 0                    | 0.00000001236646884   | 0                    |
| 0              | 0.00000000015003  | 0.00000001244029851  | 0                    | 0                    | 0.00000002225964392   | 0                    |
| 0              | 0                 | 0.000000009330223881 | 0                    | 0                    | 0.000000009893175074  | 0                    |
| 0              | 0                 | 0.000000006220149254 | 0                    | 0                    | 0.000000004946587537  | 0                    |
| 0              | 0                 | 0.000000003110074627 | 0                    | 0                    | 0.000000002473293769  | 0                    |
| 0.0000368407   | 0.0000685137      | 0.006873264925       | 0.000000000512454137 | 0.000000000604924294 | 0.01016523739         | 0.000000000566608299 |

|              |              |                |                      |                      |               |                      |
|--------------|--------------|----------------|----------------------|----------------------|---------------|----------------------|
| 0.0000370074 | 0.0000705141 | 0.006904365672 | 0.000000000514772934 | 0.000000000607661508 | 0.01046203264 | 0.000000000583151607 |
| 0.0000371741 | 0.0000691805 | 0.006935466418 | 0.000000000517091731 | 0.000000000610398722 | 0.01026416914 | 0.000000000572122735 |
| 0.0000373408 | 0.0000708475 | 0.006966567164 | 0.000000000519410528 | 0.000000000613135936 | 0.01051149852 | 0.000000000585908825 |
| 0.0000375075 | 0.0000691805 | 0.00699766791  | 0.000000000521729325 | 0.00000000061587315  | 0.01026416914 | 0.000000000572122735 |
| 0.0000376742 | 0.0000710142 | 0.007028768657 | 0.000000000524048122 | 0.000000000618610364 | 0.01053623145 | 0.000000000587287434 |
| 0.0000378409 | 0.0000715143 | 0.007059869403 | 0.000000000526366919 | 0.000000000621347578 | 0.01061043027 | 0.000000000591423261 |
| 0.0000380076 | 0.0000718477 | 0.007090970149 | 0.000000000528685716 | 0.000000000624084792 | 0.01065989614 | 0.000000000594180479 |
| 0.0000381743 | 0.000070014  | 0.007122070896 | 0.000000000531004513 | 0.000000000626822006 | 0.01038783383 | 0.00000000057901578  |
| 0.000038341  | 0.0000721811 | 0.007153171642 | 0.00000000053332331  | 0.00000000062955922  | 0.01070936202 | 0.000000000596937697 |
| 0.0000385077 | 0.0000703474 | 0.007184272388 | 0.000000000535642107 | 0.000000000632296434 | 0.0104372997  | 0.000000000581772998 |
| 0.0000386744 | 0.0000728479 | 0.007215373134 | 0.000000000537960904 | 0.000000000635033648 | 0.01080829377 | 0.000000000602452133 |
| 0.0000388411 | 0.0000735147 | 0.007246473881 | 0.000000000540279701 | 0.000000000637770862 | 0.01090722552 | 0.000000000607966569 |
| 0.0000390078 | 0.0000741815 | 0.007277574627 | 0.000000000542598498 | 0.000000000640508076 | 0.01100615727 | 0.000000000613481005 |
| 0.0000391745 | 0.0000745149 | 0.007308675373 | 0.000000000544917295 | 0.00000000064324529  | 0.01105562315 | 0.000000000616238223 |
| 0.0000393412 | 0.0000748483 | 0.007339776119 | 0.000000000547236092 | 0.000000000645982504 | 0.01110508902 | 0.000000000618995441 |
| 0.0000395079 | 0.0000731813 | 0.007370876866 | 0.000000000549554889 | 0.000000000648719718 | 0.01085775964 | 0.000000000605209351 |
| 0.0000396746 | 0.0000765153 | 0.007401977612 | 0.000000000551873686 | 0.000000000651456932 | 0.0113524184  | 0.000000000632781531 |
| 0.0000398413 | 0.0000758485 | 0.007433078358 | 0.000000000554192483 | 0.000000000654194146 | 0.01125348665 | 0.000000000627267095 |
| 0.000040008  | 0.000076682  | 0.007464179104 | 0.00000000055651128  | 0.00000000065693136  | 0.01137715134 | 0.00000000063416014  |
| 0.0000401747 | 0.0000776822 | 0.007495279851 | 0.000000000558830077 | 0.000000000659668574 | 0.01152554896 | 0.000000000642431794 |
| 0.0000403414 | 0.0000781823 | 0.007526380597 | 0.000000000561148874 | 0.000000000662405788 | 0.01159974777 | 0.000000000646567621 |
| 0.0000405081 | 0.000078349  | 0.007557481343 | 0.000000000563467671 | 0.000000000665143002 | 0.01162448071 | 0.00000000064794623  |
| 0.0000406748 | 0.0000786824 | 0.00758858209  | 0.000000000565786468 | 0.000000000667880216 | 0.01167394659 | 0.000000000650703448 |
| 0.0000408415 | 0.0000798493 | 0.007619682836 | 0.000000000568105265 | 0.00000000067061743  | 0.01184707715 | 0.000000000660353711 |
| 0.0000410082 | 0.0000790158 | 0.007650783582 | 0.000000000570424062 | 0.000000000673354644 | 0.01172341246 | 0.000000000653460666 |
| 0.0000411749 | 0.0000795159 | 0.007681884328 | 0.000000000572742859 | 0.000000000676091858 | 0.01179761128 | 0.000000000657596493 |
| 0.0000413416 | 0.0000801827 | 0.007712985075 | 0.000000000575061656 | 0.000000000678829072 | 0.01189654303 | 0.000000000663110929 |
| 0.0000415083 | 0.0000815163 | 0.007744085821 | 0.000000000577380453 | 0.000000000681566286 | 0.01209440653 | 0.000000000674139801 |
| 0.000041675  | 0.0000811829 | 0.007775186567 | 0.00000000057969925  | 0.0000000006843035   | 0.01204494065 | 0.000000000671382583 |
| 0.0000418417 | 0.000081683  | 0.007806287313 | 0.000000000582018047 | 0.000000000687040714 | 0.01211913947 | 0.00000000067551841  |
| 0.0000420084 | 0.0000820164 | 0.00783738806  | 0.000000000584336844 | 0.000000000689777928 | 0.01216860534 | 0.000000000678275628 |
| 0.0000421751 | 0.0000821831 | 0.007868488806 | 0.000000000586655641 | 0.000000000692515142 | 0.01219333828 | 0.000000000679654237 |
| 0.0000423418 | 0.0000825165 | 0.007899589552 | 0.000000000588974438 | 0.000000000695252356 | 0.01224280415 | 0.000000000682411455 |
| 0.0000425085 | 0.0000806828 | 0.007930690299 | 0.000000000591293235 | 0.00000000069798957  | 0.01197074184 | 0.000000000667246756 |
| 0.0000426752 | 0.0000826832 | 0.007961791045 | 0.000000000593612032 | 0.000000000700726784 | 0.01226753709 | 0.000000000683790064 |
| 0.0000428419 | 0.0000830166 | 0.007992891791 | 0.000000000595930829 | 0.000000000703463998 | 0.01231700297 | 0.000000000686547282 |
| 0.0000430086 | 0.0000835167 | 0.008023992537 | 0.000000000598249626 | 0.000000000706201212 | 0.01239120178 | 0.000000000690683109 |
| 0.0000431753 | 0.0000841835 | 0.008055093284 | 0.000000000600568423 | 0.000000000708938426 | 0.01249013353 | 0.000000000696197545 |
| 0.000043342  | 0.0000845169 | 0.00808619403  | 0.00000000060288722  | 0.00000000071167564  | 0.01253959941 | 0.000000000698954763 |
| 0.0000435087 | 0.0000838501 | 0.008117294776 | 0.000000000605206017 | 0.000000000714412854 | 0.01244066766 | 0.000000000693440327 |

|              |              |                |                      |                      |               |                      |
|--------------|--------------|----------------|----------------------|----------------------|---------------|----------------------|
| 0.0000436754 | 0.0000846836 | 0.008148395522 | 0.000000000607524814 | 0.000000000717150068 | 0.01256433234 | 0.000000000700333372 |
| 0.0000438421 | 0.0000851837 | 0.008179496269 | 0.000000000609843611 | 0.000000000719887282 | 0.01263853116 | 0.000000000704469199 |
| 0.0000440088 | 0.0000855171 | 0.008210597015 | 0.000000000612162408 | 0.000000000722624496 | 0.01268799703 | 0.000000000707226417 |
| 0.0000441755 | 0.0000858505 | 0.008241697761 | 0.000000000614481205 | 0.00000000072536171  | 0.01273746291 | 0.000000000709983635 |
| 0.0000443422 | 0.0000860172 | 0.008272798507 | 0.000000000616800002 | 0.000000000728098924 | 0.01276219585 | 0.000000000711362244 |
| 0.0000445089 | 0.0000865173 | 0.008303899254 | 0.000000000619118799 | 0.000000000730836138 | 0.01283639466 | 0.000000000715498071 |
| 0.0000446756 | 0.0000868507 | 0.008335       | 0.000000000621437596 | 0.000000000733573352 | 0.01288586053 | 0.000000000718255289 |
| 0.0000448423 | 0.0000873508 | 0.008366100746 | 0.000000000623756393 | 0.000000000736310566 | 0.01296005935 | 0.000000000722391116 |
| 0.000045009  | 0.0000875175 | 0.008397201493 | 0.00000000062607519  | 0.00000000073904778  | 0.01298479228 | 0.000000000723769725 |
| 0.0000451757 | 0.0000878509 | 0.008428302239 | 0.000000000628393987 | 0.000000000741784994 | 0.01303425816 | 0.000000000726526943 |
| 0.0000453424 | 0.0000848503 | 0.008459402985 | 0.000000000630712784 | 0.000000000744522208 | 0.01258906528 | 0.000000000701711981 |
| 0.0000455091 | 0.0000888511 | 0.008490503731 | 0.000000000633031581 | 0.000000000747259422 | 0.01318265579 | 0.000000000734798597 |
| 0.0000456758 | 0.0000895179 | 0.008521604478 | 0.000000000635350378 | 0.000000000749996636 | 0.01328158754 | 0.000000000740313033 |
| 0.0000458425 | 0.000090018  | 0.008552705224 | 0.000000000637669175 | 0.00000000075273385  | 0.01335578635 | 0.00000000074444886  |
| 0.0000460092 | 0.0000903514 | 0.00858380597  | 0.000000000639987972 | 0.000000000755471064 | 0.01340525223 | 0.000000000747206078 |
| 0.0000461759 | 0.0000915183 | 0.008614906716 | 0.000000000642306769 | 0.000000000758208278 | 0.01357838279 | 0.000000000756856341 |
| 0.0000463426 | 0.0000925185 | 0.008646007463 | 0.000000000644625566 | 0.000000000760945492 | 0.01372678042 | 0.000000000765127995 |
| 0.0000465093 | 0.0000910182 | 0.008677108209 | 0.000000000646944363 | 0.000000000763682706 | 0.01350418398 | 0.000000000752720514 |
| 0.000046676  | 0.0000921851 | 0.008708208955 | 0.00000000064926316  | 0.00000000076641992  | 0.01367731454 | 0.000000000762370777 |
| 0.0000468427 | 0.0000891845 | 0.008739309701 | 0.000000000651581957 | 0.000000000769157134 | 0.01323212166 | 0.000000000737555815 |
| 0.0000470094 | 0.0000881843 | 0.008770410448 | 0.000000000653900754 | 0.000000000771894348 | 0.01308372404 | 0.000000000729284161 |
| 0.0000471761 | 0.0000906848 | 0.008801511194 | 0.000000000656219551 | 0.000000000774631562 | 0.0134547181  | 0.000000000749963296 |
| 0.0000473428 | 0.0000885177 | 0.00883261194  | 0.000000000658538348 | 0.000000000777368776 | 0.01313318991 | 0.000000000732041379 |
| 0.0000475095 | 0.0000935187 | 0.008863712687 | 0.000000000660857145 | 0.00000000078010599  | 0.01387517804 | 0.000000000773399649 |
| 0.0000476762 | 0.0000941855 | 0.008894813433 | 0.000000000663175942 | 0.000000000782843204 | 0.01397410979 | 0.000000000778914085 |
| 0.0000478429 | 0.0000945189 | 0.008925914179 | 0.000000000665494739 | 0.000000000785580418 | 0.01402357567 | 0.000000000781671303 |
| 0.0000480096 | 0.0000946856 | 0.008957014925 | 0.000000000667813536 | 0.000000000788317632 | 0.01404830861 | 0.000000000783049912 |
| 0.0000481763 | 0.0000948523 | 0.008988115672 | 0.000000000670132333 | 0.000000000791054846 | 0.01407304154 | 0.000000000784428521 |
| 0.000048343  | 0.0000955191 | 0.009019216418 | 0.00000000067245113  | 0.00000000079379206  | 0.01417197329 | 0.000000000789942957 |
| 0.0000485097 | 0.0000936854 | 0.009050317164 | 0.000000000674769927 | 0.000000000796529274 | 0.01389991098 | 0.000000000774778258 |
| 0.0000486764 | 0.0000956858 | 0.00908141791  | 0.000000000677088724 | 0.000000000799266488 | 0.01419670623 | 0.000000000791321566 |
| 0.0000488431 | 0.0000960192 | 0.009112518657 | 0.000000000679407521 | 0.000000000802003702 | 0.01424617211 | 0.000000000794078784 |
| 0.0000490098 | 0.0000961859 | 0.009143619403 | 0.000000000681726318 | 0.000000000804740916 | 0.01427090504 | 0.000000000795457393 |
| 0.0000491765 | 0.0000963526 | 0.009174720149 | 0.000000000684045115 | 0.00000000080747813  | 0.01429563798 | 0.000000000796836002 |
| 0.0000493432 | 0.0000973528 | 0.009205820896 | 0.000000000686363912 | 0.000000000810215344 | 0.01444403561 | 0.000000000805107656 |
| 0.0000495099 | 0.0000968527 | 0.009236921642 | 0.000000000688682709 | 0.000000000812952558 | 0.0143698368  | 0.000000000800971829 |
| 0.0000496766 | 0.0000951857 | 0.009268022388 | 0.000000000691001506 | 0.000000000815689772 | 0.01412250742 | 0.000000000787185739 |
| 0.0000498433 | 0.0000981863 | 0.009299123134 | 0.000000000693320303 | 0.000000000818426986 | 0.0145677003  | 0.000000000812000701 |
| 0.00005001   | 0.0000978529 | 0.009330223881 | 0.0000000006956391   | 0.0000000008211642   | 0.01451823442 | 0.000000000809243483 |
| 0.0000501767 | 0.0000993532 | 0.009361324627 | 0.000000000697957897 | 0.000000000823901414 | 0.01474083086 | 0.000000000821650964 |

|              |              |                |                      |                      |               |                      |
|--------------|--------------|----------------|----------------------|----------------------|---------------|----------------------|
| 0.0000503434 | 0.0000931853 | 0.009392425373 | 0.000000000700276694 | 0.000000000826638628 | 0.01382571217 | 0.000000000770642431 |
| 0.0000505101 | 0.0000995199 | 0.009423526119 | 0.000000000702595491 | 0.000000000829375842 | 0.0147655638  | 0.000000000823029573 |
| 0.0000506768 | 0.0000988531 | 0.009454626866 | 0.000000000704914288 | 0.000000000832113056 | 0.01466663205 | 0.000000000817515137 |
| 0.0000508435 | 0.0000985197 | 0.009485727612 | 0.000000000707233085 | 0.00000000083485027  | 0.01461716617 | 0.000000000814757919 |
| 0.0000510102 | 0.0000998533 | 0.009516828358 | 0.000000000709551882 | 0.000000000837587484 | 0.01481502967 | 0.000000000825786791 |
| 0.0000511769 | 0.0000991865 | 0.009547929104 | 0.000000000711870679 | 0.000000000840324698 | 0.01471609792 | 0.000000000820272355 |
| 0.0000513436 | 0.0001005201 | 0.009579029851 | 0.000000000714189476 | 0.000000000843061912 | 0.01491396142 | 0.000000000831301227 |
| 0.0000515103 | 0.0001008535 | 0.009610130597 | 0.000000000716508273 | 0.000000000845799126 | 0.0149634273  | 0.000000000834058445 |
| 0.000051677  | 0.0001013536 | 0.009641231343 | 0.00000000071882707  | 0.00000000084853634  | 0.01503762611 | 0.000000000838194272 |
| 0.0000518437 | 0.000101687  | 0.00967233209  | 0.000000000721145867 | 0.000000000851273554 | 0.01508709199 | 0.00000000084095149  |
| 0.0000520104 | 0.0001001867 | 0.009703432836 | 0.000000000723464664 | 0.000000000854010768 | 0.01486449555 | 0.000000000828544009 |
| 0.0000521771 | 0.0001018537 | 0.009734533582 | 0.000000000725783461 | 0.000000000856747982 | 0.01511182493 | 0.000000000842330099 |
| 0.0000523438 | 0.0001021871 | 0.009765634328 | 0.000000000728102258 | 0.000000000859485196 | 0.0151612908  | 0.000000000845087317 |
| 0.0000525105 | 0.0001023538 | 0.009796735075 | 0.000000000730421055 | 0.00000000086222241  | 0.01518602374 | 0.000000000846465926 |
| 0.0000526772 | 0.0001011869 | 0.009827835821 | 0.000000000732739852 | 0.000000000864959624 | 0.01501289318 | 0.000000000836815663 |
| 0.0000528439 | 0.0001030206 | 0.009858936567 | 0.000000000735058649 | 0.000000000867696838 | 0.01528495549 | 0.000000000851980362 |
| 0.0000530106 | 0.0001035207 | 0.009890037313 | 0.000000000737377446 | 0.000000000870434052 | 0.0153591543  | 0.000000000856116189 |
| 0.0000531773 | 0.0001038541 | 0.00992113806  | 0.000000000739696243 | 0.000000000873171266 | 0.01540862018 | 0.000000000858873407 |
| 0.000053344  | 0.0001046876 | 0.009952238806 | 0.00000000074201504  | 0.00000000087590848  | 0.01553228487 | 0.000000000865766452 |
| 0.0000535107 | 0.0001026872 | 0.009983339552 | 0.000000000744333837 | 0.000000000878645694 | 0.01523548961 | 0.000000000849223144 |
| 0.0000536774 | 0.0001041875 | 0.0100144403   | 0.000000000746652634 | 0.000000000881382908 | 0.01545808605 | 0.000000000861630625 |
| 0.0000538441 | 0.000105021  | 0.01004554104  | 0.000000000748971431 | 0.000000000884120122 | 0.01558175074 | 0.00000000086852367  |
| 0.0000540108 | 0.0001053544 | 0.01007664179  | 0.000000000751290228 | 0.000000000886857336 | 0.01563121662 | 0.000000000871280888 |
| 0.0000541775 | 0.0001055211 | 0.01010774254  | 0.000000000753609025 | 0.00000000088959455  | 0.01565594955 | 0.000000000872659497 |
| 0.0000543442 | 0.0001065213 | 0.01013884328  | 0.000000000755927822 | 0.000000000892331764 | 0.01580434718 | 0.000000000880931151 |
| 0.0000545109 | 0.0001061879 | 0.01016994403  | 0.000000000758246619 | 0.000000000895068978 | 0.01575488131 | 0.000000000878173933 |
| 0.0000546776 | 0.0001070214 | 0.01020104478  | 0.000000000760565416 | 0.000000000897806192 | 0.01587854599 | 0.000000000885066978 |
| 0.0000548443 | 0.0001073548 | 0.01023214552  | 0.000000000762884213 | 0.000000000900543406 | 0.01592801187 | 0.000000000887824196 |
| 0.000055011  | 0.0001068547 | 0.01026324627  | 0.00000000076520301  | 0.00000000090328062  | 0.01585381306 | 0.000000000883688369 |
| 0.0000551777 | 0.0001058545 | 0.01029434701  | 0.000000000767521807 | 0.000000000906017834 | 0.01570541543 | 0.000000000875416715 |
| 0.0000553444 | 0.0001085217 | 0.01032544776  | 0.000000000769840604 | 0.000000000908755048 | 0.01610114243 | 0.000000000897474459 |
| 0.0000555111 | 0.0001076882 | 0.01035654851  | 0.000000000772159401 | 0.000000000911492262 | 0.01597747774 | 0.000000000890581414 |
| 0.0000556778 | 0.0001081883 | 0.01038764925  | 0.000000000774478198 | 0.000000000914229476 | 0.01605167656 | 0.000000000894717241 |
| 0.0000558445 | 0.0001090218 | 0.01041875     | 0.000000000776796995 | 0.00000000091696669  | 0.01617534125 | 0.000000000901610286 |
| 0.0000560112 | 0.0001093552 | 0.01044985075  | 0.000000000779115792 | 0.000000000919703904 | 0.01622480712 | 0.000000000904367504 |
| 0.0000561779 | 0.0001101887 | 0.01048095149  | 0.000000000781434589 | 0.000000000922441118 | 0.01634847181 | 0.000000000911260549 |
| 0.0000563446 | 0.0001106888 | 0.01051205224  | 0.000000000783753386 | 0.000000000925178332 | 0.01642267062 | 0.000000000915396376 |
| 0.0000565113 | 0.0001108555 | 0.01054315299  | 0.000000000786072183 | 0.000000000927915546 | 0.01644740356 | 0.000000000916774985 |
| 0.000056678  | 0.0001096886 | 0.01057425373  | 0.00000000078839098  | 0.00000000093065276  | 0.016274273   | 0.000000000907124722 |
| 0.0000568447 | 0.000111689  | 0.01060535448  | 0.000000000790709777 | 0.000000000933389974 | 0.01657106825 | 0.00000000092366803  |

|              |              |               |                      |                      |               |                      |
|--------------|--------------|---------------|----------------------|----------------------|---------------|----------------------|
| 0.0000570114 | 0.0001113556 | 0.01063645522 | 0.000000000793028574 | 0.000000000936127188 | 0.01652160237 | 0.000000000920910812 |
| 0.0000571781 | 0.0001125225 | 0.01066755597 | 0.000000000795347371 | 0.000000000938864402 | 0.01669473294 | 0.000000000930561075 |
| 0.0000573448 | 0.0001121891 | 0.01069865672 | 0.000000000797666168 | 0.000000000941601616 | 0.01664526706 | 0.000000000927803857 |
| 0.0000575115 | 0.0001128559 | 0.01072975746 | 0.000000000799984965 | 0.00000000094433883  | 0.01674419881 | 0.000000000933318293 |
| 0.0000576782 | 0.0001135227 | 0.01076085821 | 0.000000000802303762 | 0.000000000947076044 | 0.01684313056 | 0.000000000938832729 |
| 0.0000578449 | 0.0001143562 | 0.01079195896 | 0.000000000804622559 | 0.000000000949813258 | 0.01696679525 | 0.000000000945725774 |
| 0.0000580116 | 0.0001138561 | 0.0108230597  | 0.000000000806941356 | 0.000000000952550472 | 0.01689259644 | 0.000000000941589947 |
| 0.0000581783 | 0.0001140228 | 0.01085416045 | 0.000000000809260153 | 0.000000000955287686 | 0.01691732938 | 0.000000000942968556 |
| 0.000058345  | 0.0001098553 | 0.01088526119 | 0.00000000081157895  | 0.0000000009580249   | 0.01629900593 | 0.000000000908503331 |
| 0.0000585117 | 0.0001151897 | 0.01091636194 | 0.000000000813897747 | 0.000000000960762114 | 0.01709045994 | 0.000000000952618819 |
| 0.0000586784 | 0.0001161899 | 0.01094746269 | 0.000000000816216544 | 0.000000000963499328 | 0.01723885757 | 0.000000000960890473 |
| 0.0000588451 | 0.0001156898 | 0.01097856343 | 0.000000000818535341 | 0.000000000966236542 | 0.01716465875 | 0.000000000956754646 |
| 0.0000590118 | 0.0001148563 | 0.01100966418 | 0.000000000820854138 | 0.000000000968973756 | 0.01704099407 | 0.000000000949861601 |
| 0.0000591785 | 0.0001165233 | 0.01104076493 | 0.000000000823172935 | 0.00000000097171097  | 0.01728832344 | 0.000000000963647691 |
| 0.0000593452 | 0.0001155231 | 0.01107186567 | 0.000000000825491732 | 0.000000000974448184 | 0.01713992582 | 0.000000000955376037 |
| 0.0000595119 | 0.0001136894 | 0.01110296642 | 0.000000000827810529 | 0.000000000977185398 | 0.0168678635  | 0.000000000940211338 |
| 0.0000596786 | 0.0001118557 | 0.01113406716 | 0.000000000830129326 | 0.000000000979922612 | 0.01659580119 | 0.000000000925046639 |
| 0.0000598453 | 0.0001143562 | 0.01116516791 | 0.000000000832448123 | 0.000000000982659826 | 0.01696679525 | 0.000000000945725774 |
| 0.000060012  | 0.0001163566 | 0.01119626866 | 0.00000000083476692  | 0.00000000098539704  | 0.0172635905  | 0.000000000962269082 |
| 0.0000601787 | 0.0001168567 | 0.0112273694  | 0.000000000837085717 | 0.000000000988134254 | 0.01733778932 | 0.000000000966404909 |
| 0.0000603454 | 0.0001180236 | 0.01125847015 | 0.000000000839404514 | 0.000000000990871468 | 0.01751091988 | 0.000000000976055172 |
| 0.0000605121 | 0.0001171901 | 0.0112895709  | 0.000000000841723311 | 0.000000000993608682 | 0.01738725519 | 0.000000000969162127 |
| 0.0000606788 | 0.0001185237 | 0.01132067164 | 0.000000000844042108 | 0.000000000996345896 | 0.01758511869 | 0.000000000980190999 |
| 0.0000608455 | 0.0001193572 | 0.01135177239 | 0.000000000846360905 | 0.00000000099908311  | 0.01770878338 | 0.000000000987084044 |
| 0.0000610122 | 0.0001188571 | 0.01138287313 | 0.000000000848679702 | 0.000000001001820324 | 0.01763458457 | 0.000000000982948217 |
| 0.0000611789 | 0.0001191905 | 0.01141397388 | 0.000000000850998499 | 0.000000001004557538 | 0.01768405045 | 0.000000000985705435 |
| 0.0000613456 | 0.0001198573 | 0.01144507463 | 0.000000000853317296 | 0.000000001007294752 | 0.0177829822  | 0.000000000991219871 |
| 0.0000615123 | 0.0001203574 | 0.01147617537 | 0.000000000855636093 | 0.000000001010031966 | 0.01785718101 | 0.000000000995355698 |
| 0.000061679  | 0.0001210242 | 0.01150727612 | 0.00000000085795489  | 0.00000000101276918  | 0.01795611276 | 0.000000001000870134 |
| 0.0000618457 | 0.0001213576 | 0.01153837687 | 0.000000000860273687 | 0.000000001015506394 | 0.01800557864 | 0.000000001003627352 |
| 0.0000620124 | 0.0001218577 | 0.01156947761 | 0.000000000862592484 | 0.000000001018243608 | 0.01807977745 | 0.000000001007763179 |
| 0.0000621791 | 0.0001220244 | 0.01160057836 | 0.000000000864911281 | 0.000000001020980822 | 0.01810451039 | 0.000000001009141788 |
| 0.0000623458 | 0.0001206908 | 0.0116316791  | 0.000000000867230078 | 0.000000001023718036 | 0.01790664688 | 0.000000000998112916 |
| 0.0000625125 | 0.0001226912 | 0.01166277985 | 0.000000000869548875 | 0.00000000102645525  | 0.01820344214 | 0.000000001014656224 |
| 0.0000626792 | 0.0001231913 | 0.0116938806  | 0.000000000871867672 | 0.000000001029192464 | 0.01827764095 | 0.000000001018792051 |
| 0.0000628459 | 0.0001235247 | 0.01172498134 | 0.000000000874186469 | 0.000000001031929678 | 0.01832710682 | 0.000000001021549269 |
| 0.0000630126 | 0.0001240248 | 0.01175608209 | 0.000000000876505266 | 0.000000001034666892 | 0.01840130564 | 0.000000001025685096 |
| 0.0000631793 | 0.0001245249 | 0.01178718284 | 0.000000000878824063 | 0.000000001037404106 | 0.01847550445 | 0.000000001029820923 |
| 0.000063346  | 0.000125025  | 0.01181828358 | 0.00000000088114286  | 0.00000000104014132  | 0.01854970326 | 0.00000000103395675  |
| 0.0000635127 | 0.0001248583 | 0.01184938433 | 0.000000000883461657 | 0.000000001042878534 | 0.01852497033 | 0.000000001032578141 |

|              |              |               |                      |                      |               |                      |
|--------------|--------------|---------------|----------------------|----------------------|---------------|----------------------|
| 0.0000636794 | 0.0001255251 | 0.01188048507 | 0.000000000885780454 | 0.000000001045615748 | 0.01862390208 | 0.000000001038092577 |
| 0.0000638461 | 0.0001256918 | 0.01191158582 | 0.000000000888099251 | 0.000000001048352962 | 0.01864863501 | 0.000000001039471186 |
| 0.0000640128 | 0.0001236914 | 0.01194268657 | 0.000000000890418048 | 0.000000001051090176 | 0.01835183976 | 0.000000001022927878 |
| 0.0000641795 | 0.0001263586 | 0.01197378731 | 0.000000000892736845 | 0.00000000105382739  | 0.01874756677 | 0.000000001044985622 |
| 0.0000643462 | 0.0001268587 | 0.01200488806 | 0.000000000895055642 | 0.000000001056564604 | 0.01882176558 | 0.000000001049121449 |
| 0.0000645129 | 0.0001238581 | 0.01203598881 | 0.000000000897374439 | 0.000000001059301818 | 0.0183765727  | 0.000000001024306487 |
| 0.0000646796 | 0.0001265253 | 0.01206708955 | 0.000000000899693236 | 0.000000001062039032 | 0.0187722997  | 0.000000001046364231 |
| 0.0000648463 | 0.0001230246 | 0.0120981903  | 0.000000000902012033 | 0.000000001064776246 | 0.01825290801 | 0.000000001017413442 |
| 0.000065013  | 0.0001275255 | 0.01212929104 | 0.00000000090433083  | 0.00000000106751346  | 0.01892069733 | 0.000000001054635885 |
| 0.0000651797 | 0.0001278589 | 0.01216039179 | 0.000000000906649627 | 0.000000001070250674 | 0.0189701632  | 0.000000001057393103 |
| 0.0000653464 | 0.0001293592 | 0.01219149254 | 0.000000000908968424 | 0.000000001072987888 | 0.01919275964 | 0.000000001069800584 |
| 0.0000655131 | 0.0001285257 | 0.01222259328 | 0.000000000911287221 | 0.000000001075725102 | 0.01906909496 | 0.000000001062907539 |
| 0.0000656798 | 0.0001298593 | 0.01225369403 | 0.000000000913606018 | 0.000000001078462316 | 0.01926695846 | 0.000000001073936411 |
| 0.0000658465 | 0.0001258585 | 0.01228479478 | 0.000000000915924815 | 0.00000000108119953  | 0.01867336795 | 0.000000001040849795 |
| 0.0000660132 | 0.0001303594 | 0.01231589552 | 0.000000000918243612 | 0.000000001083936744 | 0.01934115727 | 0.000000001078072238 |
| 0.0000661799 | 0.0001313596 | 0.01234699627 | 0.000000000920562409 | 0.000000001086673958 | 0.0194895549  | 0.000000001086343892 |
| 0.0000663466 | 0.0001308595 | 0.01237809701 | 0.000000000922881206 | 0.000000001089411172 | 0.01941535608 | 0.000000001082208065 |
| 0.0000665133 | 0.0001315263 | 0.01240919776 | 0.000000000925200003 | 0.000000001092148386 | 0.01951428783 | 0.000000001087722501 |
| 0.00006668   | 0.000131693  | 0.01244029851 | 0.0000000009275188   | 0.0000000010948856   | 0.01953902077 | 0.00000000108910111  |
| 0.0000668467 | 0.0001320264 | 0.01247139925 | 0.000000000929837597 | 0.000000001097622814 | 0.01958848665 | 0.000000001091858328 |
| 0.0000670134 | 0.0001326932 | 0.0125025     | 0.000000000932156394 | 0.000000001100360028 | 0.0196874184  | 0.000000001097372764 |
| 0.0000671801 | 0.0001281923 | 0.01253360075 | 0.000000000934475191 | 0.000000001103097242 | 0.01901962908 | 0.000000001060150321 |
| 0.0000673468 | 0.0001306928 | 0.01256470149 | 0.000000000936793988 | 0.000000001105834456 | 0.01939062315 | 0.000000001080829456 |
| 0.0000675135 | 0.0001331933 | 0.01259580224 | 0.000000000939112785 | 0.00000000110857167  | 0.01976161721 | 0.000000001101508591 |
| 0.0000676802 | 0.0001323598 | 0.01262690299 | 0.000000000941431582 | 0.000000001111308884 | 0.01963795252 | 0.000000001094615546 |
| 0.0000678469 | 0.00013336   | 0.01265800373 | 0.000000000943750379 | 0.000000001114046098 | 0.01978635015 | 0.0000000011028872   |
| 0.0000680136 | 0.0001338601 | 0.01268910448 | 0.000000000946069176 | 0.000000001116783312 | 0.01986054896 | 0.000000001107023027 |
| 0.0000681803 | 0.0001341935 | 0.01272020522 | 0.000000000948387973 | 0.000000001119520526 | 0.01991001484 | 0.000000001109780245 |
| 0.000068347  | 0.0001343602 | 0.01275130597 | 0.00000000095070677  | 0.00000000112225774  | 0.01993474777 | 0.000000001111158854 |
| 0.0000685137 | 0.0001348603 | 0.01278240672 | 0.000000000953025567 | 0.000000001124994954 | 0.02000894659 | 0.000000001115294681 |
| 0.0000686804 | 0.0001351937 | 0.01281350746 | 0.000000000955344364 | 0.000000001127732168 | 0.02005841246 | 0.000000001118051899 |
| 0.0000688471 | 0.0001358605 | 0.01284460821 | 0.000000000957663161 | 0.000000001130469382 | 0.02015734421 | 0.000000001123566335 |
| 0.0000690138 | 0.0001355271 | 0.01287570896 | 0.000000000959981958 | 0.000000001133206596 | 0.02010787834 | 0.000000001120809117 |
| 0.0000691805 | 0.0001365273 | 0.0129068097  | 0.000000000962300755 | 0.00000000113594381  | 0.02025627596 | 0.000000001129080771 |
| 0.0000693472 | 0.0001356938 | 0.01293791045 | 0.000000000964619552 | 0.000000001138681024 | 0.02013261128 | 0.000000001122187726 |
| 0.0000695139 | 0.0001371941 | 0.01296901119 | 0.000000000966938349 | 0.000000001141418238 | 0.02035520772 | 0.000000001134595207 |
| 0.0000696806 | 0.0001380276 | 0.01300011194 | 0.000000000969257146 | 0.000000001144155452 | 0.0204788724  | 0.000000001141488252 |
| 0.0000698473 | 0.000138361  | 0.01303121269 | 0.000000000971575943 | 0.000000001146892666 | 0.02052833828 | 0.00000000114424547  |
| 0.000070014  | 0.0001376942 | 0.01306231343 | 0.00000000097389474  | 0.00000000114962988  | 0.02042940653 | 0.000000001138731034 |
