# Supplementary material for: Optimization of Microchannels and Application of Basic Activation Functions of Deep Neural Network for Accuracy Analysis of Microfluidic Parameter Data
Source: MDPI journal article supplement (doi:10.3390/mi13081352), 2022-08-20
Supplement: s1 [file s1]

Activation functions: LeakyReLU

Optimizer: adam

Epochs = 20, Batch size = 50

Threshold value = 5e-05

Number of folds = 5

Accuracy of each fold : [93.125, 94.6875, 95.625, 92.1875, 97.17868338557993]

Avg accuracy : 94.56 %

Epoch loss :

[[4.66227812e-06 7.30785814e-08 6.65705624e-09 1.09688381e-09  
6.08723016e-10 5.80673398e-10 6.21950658e-10 5.77132009e-10  
5.63059654e-10 5.78495807e-10 6.13040119e-10 5.88513627e-10  
5.56172830e-10 5.42055345e-10 5.67753344e-10 5.48141421e-10  
5.22969168e-10 5.19597976e-10 5.19048748e-10 5.05231523e-10]  
[5.11282239e-10 5.18123322e-10 5.26317323e-10 5.03901698e-10  
5.12399845e-10 4.97132169e-10 5.07051956e-10 5.13876219e-10  
5.13600662e-10 4.90393448e-10 5.13178833e-10 4.97599961e-10  
4.77102302e-10 5.85257454e-10 4.83251050e-10 4.96789720e-10  
5.23013521e-10 4.63033861e-10 4.55722848e-10 4.54879440e-10]  
[4.52544197e-10 4.71233996e-10 5.24294164e-10 4.86378882e-10  
4.40337516e-10 4.36703312e-10 4.42706399e-10 5.79556625e-10  
4.54621923e-10 4.20258051e-10 4.25502938e-10 4.25192631e-10  
4.25334185e-10 4.01947947e-10 5.15118892e-10 4.83410811e-10  
3.95767252e-10 3.77716913e-10 3.76618986e-10 3.97976596e-10]  
[3.79875381e-10 3.49593687e-10 3.56187330e-10 3.74430487e-10  
4.26647856e-10 4.08911238e-10 3.47507717e-10 4.62212185e-10  
3.95508154e-10 3.66423697e-10 4.09857814e-10 3.25575317e-10  
3.20053539e-10 3.40191958e-10 3.07921827e-10 3.52647134e-10  
3.66163877e-10 6.23939123e-10 4.05092820e-10 3.36305039e-10]  
[3.33443995e-10 3.16270149e-10 3.32277428e-10 4.01970901e-10  
3.56291968e-10 4.38678788e-10 4.11057494e-10 3.65442537e-10  
3.33432643e-10 3.75154879e-10 2.69446687e-10 3.23334803e-10  
3.37245204e-10 3.01536740e-10 3.59539010e-10 2.89574503e-10  
3.77198661e-10 3.16455362e-10 2.93678776e-10 3.92304633e-10]]
