# Supplementary material for: Optimization of Microchannels and Application of Basic Activation Functions of Deep Neural Network for Accuracy Analysis of Microfluidic Parameter Data
Source: MDPI journal article supplement (doi:10.3390/mi13081352), 2022-08-20
Supplement: s1 [file s1]

Activation functions: swish

Optimizer: adam

Epochs = 20, Batch size = 50

Threshold value = 6.000000000000001e-05

Number of folds = 5

Accuracy of each fold : [91.875, 65.0, 4.0625, 0.0, 95.29780564263322]

Avg accuracy : 51.25 %

Epoch loss :

[[1.43878606e-06 8.20776620e-08 7.78705633e-09 9.23744914e-10  
6.35314579e-10 6.06919737e-10 6.27242480e-10 6.07619455e-10  
8.08579648e-10 7.26372129e-10 7.84146470e-10 8.30112867e-10  
1.00317143e-09 9.51867918e-10 7.04410252e-10 6.71603162e-10  
1.80210813e-09 1.78731732e-08 3.03372438e-09 1.04328102e-09]  
[2.63682800e-08 4.22838564e-09 1.09319109e-09 4.60720839e-09  
5.61170266e-09 1.57055258e-08 5.65867397e-09 9.21676602e-09  
1.20454917e-08 1.37406619e-08 2.68343769e-09 5.07549691e-09  
1.03126121e-08 1.16012506e-08 5.35949463e-09 1.44528505e-08  
1.32715683e-09 3.23365406e-08 1.17481926e-08 2.97970426e-09]  
[2.18443197e-09 2.40971998e-09 1.45661572e-08 8.34788860e-09  
1.22683010e-08 1.88119254e-09 1.78243518e-08 1.30404771e-08  
6.78222944e-09 5.27613464e-09 2.66454014e-09 4.56522429e-08  
1.32000508e-08 3.46867135e-09 1.06926479e-09 4.34941194e-09  
1.76758874e-08 3.12729820e-09 2.93912628e-08 7.30659888e-09]  
[1.94206091e-08 1.55784630e-08 1.10613261e-08 3.82966991e-09  
5.03393416e-08 2.82992829e-08 4.57844429e-09 4.47462156e-09  
1.55366919e-08 2.57872035e-09 7.15599802e-09 1.34675062e-08  
2.71023701e-08 1.62758145e-08 1.17587415e-08 1.09268745e-08  
3.35502359e-09 3.34574501e-08 1.41335947e-08 8.44941805e-09]  
[5.92188298e-09 2.54038675e-08 1.15597789e-08 5.02641573e-09  
1.15465220e-08 4.92092544e-09 1.52577115e-08 3.67030388e-08  
8.40225667e-09 2.73523248e-08 1.06278470e-08 8.71607586e-09  
1.85189575e-09 3.57539909e-09 1.75874226e-09 4.25893916e-08  
1.03105284e-08 1.49752584e-08 9.68315028e-09 7.21569560e-09]]
