# Supplementary material for: Optimization of Microchannels and Application of Basic Activation Functions of Deep Neural Network for Accuracy Analysis of Microfluidic Parameter Data
Source: MDPI journal article supplement (doi:10.3390/mi13081352), 2022-08-20
Supplement: s1 [file s1]

Activation functions: LeakyReLU

Optimizer: adam

Epochs = 20, Batch size = 50

Threshold value = 6.000000000000001e-05

Number of folds = 5

Accuracy of each fold : [97.1875, 100.0, 100.0, 100.0, 100.0]

Avg accuracy : 99.44 %

Epoch loss :

[[2.09846485e-06 5.46298864e-08 5.27129806e-09 1.40650624e-09  
9.38074507e-10 7.40518591e-10 6.11458606e-10 5.27373256e-10  
4.98341868e-10 4.33248798e-10 4.60301158e-10 3.82671367e-10  
3.41886935e-10 3.10995868e-10 2.98574387e-10 2.71462769e-10  
2.40231696e-10 2.27829713e-10 2.37672770e-10 2.02082684e-10]  
[1.87991164e-10 1.62504510e-10 1.44311008e-10 1.34997805e-10  
1.24038002e-10 1.46883200e-10 1.37843334e-10 1.03320359e-10  
9.44508846e-11 9.20776164e-11 9.84781770e-11 8.43122377e-11  
6.97836650e-11 7.46765358e-11 6.71865411e-11 7.13883536e-11  
5.67014942e-11 6.00941033e-11 5.37779855e-11 5.49194822e-11]  
[5.13886433e-11 4.54023590e-11 4.43406353e-11 4.29045098e-11  
3.85974690e-11 4.45658649e-11 3.66850821e-11 3.91320240e-11  
3.39113147e-11 3.63653344e-11 3.62440078e-11 2.90825194e-11  
3.33062987e-11 2.55102918e-11 2.20971106e-11 2.28434407e-11  
2.03287786e-11 2.05787210e-11 1.67919446e-11 1.61974722e-11]  
[1.54291319e-11 1.22793381e-11 1.20901717e-11 1.22746483e-11  
1.27270200e-11 1.64973972e-11 1.06695833e-11 1.10341380e-11  
1.62917891e-11 9.96122369e-12 1.08182525e-11 1.04707831e-11  
8.26819082e-12 7.68472092e-12 7.12959553e-12 1.29121653e-11  
8.53801231e-12 1.13565190e-11 9.16899109e-12 6.22415791e-12]  
[1.08354358e-11 9.19755071e-12 1.17280118e-11 1.65852106e-11  
8.75476497e-11 5.22069610e-11 2.08130446e-09 2.16234586e-09  
3.17143201e-10 6.26422358e-10 1.81220494e-09 3.89428445e-09  
1.56716098e-10 1.73736650e-10 6.70213973e-09 6.70541234e-10  
2.84806206e-10 1.90574709e-10 9.11140141e-09 2.32632869e-09]]
